# Supplementary material for: A systematic review of trial registry entries for randomized clinical trials investigating COVID-19 medical prevention and treatment
Source: PLoS One. 2020 Aug 20;15(8):e0237903. doi: 10.1371/journal.pone.0237903 (PMC7444584; doi:10.1371/journal.pone.0237903)
Supplement: S4 Appendix — (CSV) [file pone.0237903.s004.csv]

COVID19-927-trials
TrialID	ID all	ID included	web address	Screening	Count	Reason for exclusion	Table 4	Table 1-3	Continent	Countries	Target size	Adults/children/both (><18y)	Gender	Phase	Masking	Mortality as primary outcome	Mortality as secondary	Any mortality outcome	Multicenter	Disease table	Recruitment Status 13/6	Date registration	Source Register	Public title		Disease severity	Intervention	Contact Firstname	Category (if included)	Intervention short	Primary outcome	Contact Email	Contact Tel	Contact Affiliation	Study design	Condition	Study type	Last Refreshed on	Screening Jens	Category (if included)	Intervention short	Intervention subclass	Comment on exclusion	Primary sponsor	Date registration3	Export date	other records	Inclusion agemin	Inclusion agemax
NCT04246242	1	1	https://clinicaltrials.gov/show/NCT04246242	Inclusion	1		Umifenovir	Antiviral	Asia	China	500	N/A	All	4	Single blind	1	0	1	1	Diagnosed/suspected COVID	Not recruiting	27/01/2020	ClinicalTrials.gov	A Randomized Multicenter Controlled Clinical Trial of Arbidol in Patients With 2019 Novel Coronavirus (2019-nCoV)	A Randomized Multicenter Controlled Clin	N/A	Drug: Conventional treatment group;Drug: arbidol,200mg,tid;Drug: arbidol,400mg,tid		AV	Arbidol	Mortality	pinhuapan668@126.com	+86 13574810968		Allocation: Randomized. Intervention model: Parallel Assignment. Primary purpose: Treatment. Masking: Single (Participant).	2019 Novel Coronavirus	Interventional	3 February 2020	Inclusion	AV	Arbidol			Xiangya Hospital of Central South University	20200127	4/7/2020 10:40:56 AM	No	N/A	N/A
NCT04252885	2	2	https://clinicaltrials.gov/show/NCT04252885	Inclusion	1		Ritonavir/Lopinavir/Umifenovir	Antiviral	Asia	China	125	Adults	All	4	Open label		0		0	Diagnosed/suspected COVID	Recruiting	30/01/2020	ClinicalTrials.gov	The Efficacy of Lopinavir Plus Ritonavir and Arbidol Against Novel Coronavirus Infection	The Efficacy of Lopinavir Plus Ritonavir	Confirmed	Drug: Lopinavir and Ritonavir Tablets;Drug: Arbidol	;	AV	Ritonavir/Lopinavir/Arbidol	rate of virus inhibition	lipipi007@163.com;	020- 36052117;		Allocation: Randomized. Intervention model: Parallel Assignment. Primary purpose: Treatment. Masking: None (Open Label).	Coronavirus Infections	Interventional	17 February 2020	Inclusion	AV	Lopinavis+Ritonavir/Arbidol			Guangzhou 8th People's Hospital	20200130	4/7/2020 10:40:56 AM	No	18 Years	80 Years
NCT04251871	3	3	https://clinicaltrials.gov/show/NCT04251871	Inclusion	1		TCM	UCM	Asia	China	150	Both	All	N/A	Open label		1	1	0	Prevention	Recruiting	28/01/2020	ClinicalTrials.gov	Treatment and Prevention of Traditional Chinese Medicines (TCMs) on 2019-nCoV Infection	Treatment and Prevention of Traditional	Prevention	Drug: Conventional medicines (Oxygen therapy, alfa interferon via aerosol inhalation, and lopinavir/ritonavir) and Traditional Chinese Medicines (TCMs) granules;Drug: Conventional medicines (Oxygen therapy, alfa interferon via aerosol inhalation, and lopinavir/ritonavir)	; ;	TCM	TCM	Time to complete remission of 2019-nCoV infection-associated symptoms	;wrl7905@163.com;wrl7905@163.com	;+86 10 66933436;+86 66933323	302 Military Hospital;	Allocation: Randomized. Intervention model: Parallel Assignment. Primary purpose: Treatment. Masking: None (Open Label).	Pneumonia Caused by Human Coronavirus (Disorder)	Interventional	17 February 2020	Inclusion	Unconventional medicine	TCM (NS)	TCM (Traditional Chinese Medicine)		Beijing 302 Hospital	20200128	4/7/2020 10:40:56 AM	No	14 Years	80 Years
NCT04260594	4	4	https://clinicaltrials.gov/show/NCT04260594	Inclusion	1		Umifenovir	Antiviral	Asia	China	380	Adults	All	4	Open label		1	1	1	Mild/moderate	Not recruiting	06/02/2020	ClinicalTrials.gov	Clinical Study of Arbidol Hydrochloride Tablets in the Treatment of Pneumonia Caused by Novel Coronavirus	Clinical Study of Arbidol Hydrochloride	Mild	Drug: Arbidol;Other: basic treatment		AV	Arbidol	Virus negative conversion rate in the first week				Allocation: Randomized. Intervention model: Parallel Assignment. Primary purpose: Treatment. Masking: None (Open Label).	2019-nCoV	Interventional	17 February 2020	Inclusion	AV	Arbidol			Jieming QU	20200206	4/7/2020 10:40:56 AM	No	18 Years	75 Years
NCT04261426	5	5	https://clinicaltrials.gov/show/NCT04261426	Inclusion	1		Immunoglobulin	Antibodies	Asia	China	80	Adults	All	3	Open label		1	1	0	Hospitalised/Severe/ICU	Not recruiting	06/02/2020	ClinicalTrials.gov	The Efficacy of Intravenous Immunoglobulin Therapy for Severe 2019-nCoV Infected Pneumonia	The Efficacy of Intravenous Immunoglobul	Severe	Drug: Intravenous Immunoglobulin;Other: Standard care		IT	Immunoglobulin	Clinical improvement based on the 7-point scale	litsh@263.net	010-69155086		Allocation: Randomized. Intervention model: Parallel Assignment. Primary purpose: Treatment. Masking: None (Open Label).	2019-nCoV	Interventional	17 February 2020	Inclusion	Immunotherapy	Immunoglobulin			Peking Union Medical College Hospital	20200206	4/7/2020 10:40:56 AM	No	18 Years	N/A
NCT04261907	6	6	https://clinicaltrials.gov/show/NCT04261907	Inclusion	1		Ritonavir/Lopinavir/ASC09	Antiviral	Asia	China	160	Adults	All	N/A	Open label		0		1	Hospitalised/Severe/ICU	Not recruiting	06/02/2020	ClinicalTrials.gov	Evaluating and Comparing the Safety and Efficiency of ASC09/Ritonavir and Lopinavir/Ritonavir for Novel Coronavirus Infection	Evaluating and Comparing the Safety and	Hospitalised	Drug: ASC09/ritonavir group;Drug: lopinavir/ritonavir group	;	AV	Ritonavir/Lopinavir/ASC09	The incidence of composite adverse outcome	;xxw69@126.com	;+86 13605708066	First Affiliated Hospital of Zhejiang University;	Allocation: Randomized. Intervention model: Parallel Assignment. Primary purpose: Treatment. Masking: None (Open Label).	2019-nCoV	Interventional	17 February 2020	Inclusion	AV	ASC09/Lopinavir			First Affiliated Hospital of Zhejiang University	20200206	4/7/2020 10:40:56 AM	No	18 Years	75 Years
NCT04244591	8	7	https://clinicaltrials.gov/show/NCT04244591	Inclusion	1		Glucocorticoid	Glucocorticoid	Asia	China	80	Adults	All	3	Open label		1	1	1	Hospitalised/Severe/ICU	Completed	23/01/2020	ClinicalTrials.gov	Glucocorticoid Therapy for Novel CoronavirusCritically Ill Patients With Severe Acute Respiratory Failure	Glucocorticoid Therapy for Novel Coronav	Severe	Drug: methylprednisolone therapy;Other: Standard care		AI	Methylprednisolone	Lower Murray lung injury score	dubin98@gmail.com	8610-6915-5036		Allocation: Randomized. Intervention model: Parallel Assignment. Primary purpose: Treatment. Masking: None (Open Label).	Coronavirus Infections;Respiratory Infection Virus	Interventional	24 February 2020	Inclusion	Antiinflammatory	Methylprednisolone			Peking Union Medical College Hospital	20200123	4/7/2020 10:40:56 AM	No	18 Years	N/A
NCT04268537	9	8	https://clinicaltrials.gov/show/NCT04268537	Inclusion	1		PD-1 blocking antibody/Thymosin	Other immunotherapeutics	Asia	China	120	Adults	All	2	Single blind		1	1	0	Hospitalised/Severe/ICU	Not recruiting	08/02/2020	ClinicalTrials.gov	Immunoregulatory Therapy for 2019-nCoV	Immunoregulatory Therapy for 2019-nCoV	ICU	Drug: PD-1 blocking antibody+standard treatment;Drug: Thymosin+standard treatment;Other: standard treatment		IT	PD-1 blocking antibody/Thymosin	lung injury score				Allocation: Randomized. Intervention model: Parallel Assignment. Primary purpose: Treatment. Masking: Single (Participant).	2019 nCoV, PD-1	Interventional	24 February 2020	Inclusion	Immunotherapy/Adjunct therapy	PD-1 antagonist/Thymosin			Southeast University, China	20200208	4/7/2020 10:40:56 AM	No	18 Years	N/A
NCT04273529	12	9	https://clinicaltrials.gov/show/NCT04273529	Inclusion	1		Thalidomide	Other immunotherapeutics	Asia	China	100	Adults	All	2	Quadruple blind		1	1	1	Diagnosed/suspected COVID	Not recruiting	14/02/2020	ClinicalTrials.gov	The Efficacy and Safety of Thalidomide in the Adjuvant Treatment of Moderate New Coronavirus (COVID-19) Pneumonia	The Efficacy and Safety of Thalidomide i	Confirmed	Drug: thalidomide;Drug: placebo	;	IT	Thalidomide	Time to Clinical recoveryTime to Clinical Recovery	;xiajinglin@fudan.edu.cn	;0577-55578166	First Affiliated Hospital of Wenzhou Medical University;	Allocation: Randomized. Intervention model: Parallel Assignment. Primary purpose: Treatment. Masking: Quadruple (Participant, Care Provider, Investigator, Outcomes Assessor).	COVID-19 Thalidomide	Interventional	2 March 2020	Inclusion	Immunotherapy	Thalidomide			First Affiliated Hospital of Wenzhou Medical University	20200214	4/7/2020 10:40:56 AM	No	18 Years	N/A
NCT04273581	13	10	https://clinicaltrials.gov/show/NCT04273581	Inclusion	1		Thalidomide	Other immunotherapeutics	Asia	China	40	Adults	All	2	Quadruple blind		1	1	1	Hospitalised/Severe/ICU	Not recruiting	14/02/2020	ClinicalTrials.gov	The Efficacy and Safety of Thalidomide Combined With Low-dose Hormones in the Treatment of Severe COVID-19	The Efficacy and Safety of Thalidomide C	Severe	Drug: placebo;Drug: Thalidomide	;	IT	Thalidomide	Time to Clinical Improvement	;xiajinglin@fudan.edu.cn	;0577-55578166	First Affiliated Hospital of Wenzhou Medical University;	Allocation: Randomized. Intervention model: Parallel Assignment. Primary purpose: Treatment. Masking: Quadruple (Participant, Care Provider, Investigator, Outcomes Assessor).	COVID-19 Thalidomide	Interventional	2 March 2020	Inclusion	Immunotherapy	Thalidomide			First Affiliated Hospital of Wenzhou Medical University	20200214	4/7/2020 10:40:56 AM	No	18 Years	N/A
NCT04273646	14	11	https://clinicaltrials.gov/show/NCT04273646	Inclusion	1		Stem cells	Stem cells	Asia	China	48	Adults	All	N/A	Open label		1	1	0	Hospitalised/Severe/ICU	Not recruiting	14/02/2020	ClinicalTrials.gov	Study of Human Umbilical Cord Mesenchymal Stem Cells in the Treatment of Novel Coronavirus Severe Pneumonia	Study of Human Umbilical Cord Mesenchyma	Severe	Biological: UC-MSCs;Drug: Placebo		SC	UC-MSC (Umbilical Cord(UC)-Derived Mesenchymal Stem Cells(MSCs))	Pneumonia severity index	whuhjy@sina.com	8613554361146		Allocation: Randomized. Intervention model: Parallel Assignment. Primary purpose: Treatment. Masking: None (Open Label).	2019 Novel Coronavirus Pneumonia;COVID-19	Interventional	2 March 2020	Inclusion	Stem Cells	UC-MSC			Wuhan Union Hospital, China	20200214	4/7/2020 10:40:56 AM	No	18 Years	65 Years
NCT04275388	16	12	https://clinicaltrials.gov/show/NCT04275388	Inclusion	1		TCM	UCM	Asia	China	348	Adults	All	N/A	Open label		0		1	Diagnosed/suspected COVID	Not recruiting	17/02/2020	ClinicalTrials.gov	Xiyanping Injection for the Treatment of New Coronavirus Infected Pneumonia	Xiyanping Injection for the Treatment of	Confirmed	Drug: Xiyanping injection;Drug: Lopinavir / ritonavir, alpha-interferon nebulization		TCM	TCM	Clinical recovery time	lunliweiyuanhui2009@126.com	021-37990333		Allocation: Randomized. Intervention model: Parallel Assignment. Primary purpose: Treatment. Masking: None (Open Label).	2019 Novel Coronavirus Pneumonia	Interventional	2 March 2020	Inclusion	AV/Immunotherapy	Xiyanping/Lopinavir+ritonavir/alpha-interferon nebulization	Xiyanping injection		Jiangxi Qingfeng Pharmaceutical Co. Ltd.	20200217	4/7/2020 10:40:56 AM	No	18 Years	70 Years
NCT04279197	17	13	https://clinicaltrials.gov/show/NCT04279197	Inclusion	1		TCM	UCM	Asia	China	136	Adults	All	2	Double blind		0		1	Diagnosed/suspected COVID	Recruiting	15/02/2020	ClinicalTrials.gov	Treatment of Pulmonary Fibrosis Due to 2019-nCoV Pneumonia With Fuzheng Huayu	Treatment of Pulmonary Fibrosis Due to 2	Rehabilitation	Drug: N-acetylcysteine+ Fuzheng Huayu Tablet;Drug: N-acetylcysteine+Placebo	;	TCM	TCM	Lung function including FVC, FVC as a percentage of projected value and DLco	chenghailiu@hotmail.com;	8621-20256521;		Allocation: Randomized. Intervention model: Parallel Assignment. Primary purpose: Treatment. Masking: Double (Participant, Investigator).	Pulmonary Fibrosis Due to 2019-nCoV	Interventional	2 March 2020	Inclusion	Unconventional medicine	TCM (fuzheng huayu tablet)	Fuzheng Huayu Tablet		ShuGuang Hospital	20200215	4/7/2020 10:40:56 AM	No	18 Years	65 Years
NCT04280224	19	14	https://clinicaltrials.gov/show/NCT04280224	Inclusion	1		NK cells	Other immunotherapeutics	Asia	China	30	Adults	All	1	Open label		1	1	0	Diagnosed/suspected COVID	Recruiting	13/02/2020	ClinicalTrials.gov	NK Cells Treatment for Novel Coronavirus Pneumonia	NK Cells Treatment for Novel Coronavirus	Pneumonia	Biological: NK Cells	;	IT	NK Cells	Improvement of clinical symptoms including duration of fever	wulingzhu@xxmu.edu.cn;guomh@163.com	00863733029089;00863734402517		Allocation: Randomized. Intervention model: Parallel Assignment. Primary purpose: Treatment. Masking: None (Open Label).	Novel Coronavirus Pneumonia	Interventional	2 March 2020	Inclusion	Immunotherapy	NK cells			Xinxiang medical university	20200213	4/7/2020 10:40:56 AM	No	18 Years	65 Years
NCT04276688	20	15	https://clinicaltrials.gov/show/NCT04276688	Inclusion	1		Ritonavir/Lopinavir/Interferon Beta-1B/Umifenovir	Antiviral	Asia	Hong Kong	70	Adults	All	2	Open label		1	1	0	Hospitalised/Severe/ICU	Completed	11/02/2020	ClinicalTrials.gov	Lopinavir/ Ritonavir, Ribavirin and IFN-beta Combination for nCoV Treatment	Lopinavir/ Ritonavir, Ribavirin and IFN-	Hospitalised	Drug: Lopinavir/ritonavir;Drug: Ribavirin;Drug: Interferon Beta-1B	; ;	AV	Ritonavir/Lopinavir/Interferon Beta-1B/Arbidol	Time to negative nasopharyngeal swab	;ivanfn@gmail.com;ivanfn@gmail.com	;+862 22554049;852 22554049	The University of Hong Kong;	Allocation: Randomized. Intervention model: Parallel Assignment. Primary purpose: Treatment. Masking: None (Open Label).	Novel Coronavirus Infection	Interventional	9 March 2020	Inclusion	AV/Immunotherapy	Lopinavir+ritonavir/Ribavirin/Interferon Beta-1B			The University of Hong Kong	20200211	4/7/2020 10:40:56 AM	No	18 Years	N/A
NCT04282902	22	16	https://clinicaltrials.gov/show/NCT04282902	Inclusion	1		Pirfenidone	Antiinflammatory	Asia	China	294	Adults	All	3	Open label		0		0	Diagnosed/suspected COVID	Recruiting	10/02/2020	ClinicalTrials.gov	A Study to Evaluate the Efficacy and Safety of Pirfenidone With Novel Coronavirus Infection	A Study to Evaluate the Efficacy and Saf	Pneumonia	Drug: pirfenidone	;	AI	Pirfenidone	Chest CT	huilanz_76@163.com;	15391532171;		Allocation: Randomized. Intervention model: Parallel Assignment. Primary purpose: Treatment. Masking: None (Open Label).	Novel Coronavirus Pneumonia;Pneumonia;Pirfenidone	Interventional	9 March 2020	Inclusion	Antiinflammatory	Pirfenidone			Huilan Zhang	20200210	4/7/2020 10:40:56 AM	No	18 Years	N/A
NCT04286503	25	17	https://clinicaltrials.gov/show/NCT04286503	Inclusion	1		Claritromycin/lopinavir/Umifenovir	Other drug combinations	Asia	China	520	Adults	All	4	Open label		0		1	Diagnosed/suspected COVID	Not recruiting	25/02/2020	ClinicalTrials.gov	The Clinical Study of Carrimycin on Treatment Patients With COVID-19	The Clinical Study of Carrimycin on Trea	Pneumonia	Drug: Carrimycin;Drug: lopinavir/ritonavir tablets or Arbidol or chloroquine phosphate;Drug: basic treatment	;	AV/AM/AB	Clarimycin/lopinavir/arbidol	Fever to normal time	;dinghuiguo@medmail.com.cn	;+86-13911683832	Beijing YouAn Hospital;	Allocation: Randomized. Intervention model: Parallel Assignment. Primary purpose: Treatment. Masking: None (Open Label).	Novel Coronavirus Infectious Disease (COVID-19)	Interventional	9 March 2020	Inclusion	Antibiotic	Carrimycin			Beijing YouAn Hospital	20200225	4/7/2020 10:40:56 AM	No	18 Years	75 Years
NCT04295551	27	18	https://clinicaltrials.gov/show/NCT04295551	Inclusion	1		TCM	UCM	N/A	N/A	80	Adults	All	N/A	Open label		0		1	Diagnosed/suspected COVID	Not recruiting	03/03/2020	ClinicalTrials.gov	Multicenter Clinical Study on the Efficacy and Safety of Xiyanping Injection in the Treatment of New Coronavirus Infection Pneumonia (General and Severe)	Multicenter Clinical Study on the Effica	Confirmed	Drug: Lopinavir / ritonavir tablets combined with Xiyanping injection;Drug: Lopinavir/ritonavir treatment		TCM	TCM	Clinical recovery time				Allocation: Randomized. Intervention model: Parallel Assignment. Primary purpose: Treatment. Masking: None (Open Label).	COVID-19	Interventional	16 March 2020	Inclusion	AV	Xiyanping	Xiyangping		Jiangxi Qingfeng Pharmaceutical Co. Ltd.	20200303	4/7/2020 10:40:56 AM	No	18 Years	100 Years
NCT04293887	29	19	https://clinicaltrials.gov/show/NCT04293887	Inclusion	1		INF-Beta	Other immunotherapeutics	Asia	China	328	Adults	All	1	Open label		0		1	Diagnosed/suspected COVID	Not recruiting	15/02/2020	ClinicalTrials.gov	Efficacy and Safety of IFN-a2ß in the Treatment of Novel Coronavirus Patients	Efficacy and Safety of IFN-a2ß in the Tr	Pneumonia	Drug: Recombinant human interferon a1ß		IT	Interferon a1ß	The incidence of side effects	Zhaojp88@126.com	13507138234		Allocation: Randomized. Intervention model: Parallel Assignment. Primary purpose: Treatment. Masking: None (Open Label).	COVID-19;Recombinant Human Interferon a1ß	Interventional	16 March 2020	Inclusion	Immunotherapy	Recombinant human interferon a1ß			Tongji Hospital	20200215	4/7/2020 10:40:56 AM	No	18 Years	N/A
NCT04252274	30	20	https://clinicaltrials.gov/show/NCT04252274	Inclusion	1		Darunavir/Cobicistat	Antiviral	Asia	China	30	N/A	All	3	Open label		1	1	0	Diagnosed/suspected COVID	Recruiting	29/01/2020	ClinicalTrials.gov	Efficacy and Safety of Darunavir and Cobicistat for Treatment of Pneumonia Caused by 2019-nCoV	Efficacy and Safety of Darunavir and Cob	Pneumonia	Drug: Darunavir and Cobicistat		AV	Darunavir/Cobicistat	The virological clearance rate of throat swabs	luhongzhou@fudan.edu.cn	+86-021-37990333		Allocation: Randomized. Intervention model: Parallel Assignment. Primary purpose: Treatment. Masking: None (Open Label).	Pneumonia, Pneumocystis;Coronavirus	Interventional	16 March 2020	Inclusion	AV	Darunavir+Cobicistat			Shanghai Public Health Clinical Center	20200129	4/7/2020 10:40:56 AM	No	N/A	N/A
NCT04264533	32	21	https://clinicaltrials.gov/show/NCT04264533	Inclusion	1		Vitamin C	Dietary supplements	Asia	China	140	Adults	All	2	Triple blind		1	1	0	Diagnosed/suspected COVID	Recruiting	04/02/2020	ClinicalTrials.gov	Vitamin C Infusion for the Treatment of Severe 2019-nCoV Infected Pneumonia	Vitamin C Infusion for the Treatment of	Confirmed	Drug: VC;Drug: Sterile Water for Injection	; ;	Dietary supplements	Vitamin C	Ventilation-free days	;pengzy5@hotmail.com;	;+8618672396028;	Wuhan University;	Allocation: Randomized. Intervention model: Parallel Assignment. Primary purpose: Treatment. Masking: Triple (Participant, Care Provider, Outcomes Assessor).	Vitamin C;Pneumonia, Viral;Pneumonia, Ventilator-Associated	Interventional	23 March 2020	Inclusion	Unconventional medicine	Vitamin C			ZhiYong Peng	20200204	4/7/2020 10:40:56 AM	No	18 Years	N/A
IRCT20100228003449N28	36	22	http://en.irct.ir/trial/46538	Inclusion	1		INF-Beta	Other immunotherapeutics	Asia	Iran	30	Adults	All	3	Open label		1	1	0	Diagnosed/suspected COVID	Completed	2020-03-19	IRCT	Interferon in treatment of COVID-19	Interferon in treatment of COVID-19	Confirmed/suspected	Intervention 1: Intervention group: Concomitant with the national corona treatment recommendation (hydroxychloroquine + Oseltamivir +Lopinavir/ritonavir), patients will receive interferon B, sub type 1a (CinnaGen Company) with dose of 44 mcg subcutaneously every other day for 14 days. Intervention 2: Control group: Patients will receive the national corona treatment recommendation (hydroxychloroq…	Hossein Khalili	IT	interferon B, sub type 1a	Response to the treatment	khalilih@tums.ac.ir	98216654715	Tehran University of Medical Sciences	Randomization: Randomized, Blinding: Not blinded, Placebo: Not used, Assignment: Parallel, Purpose: Treatment, Randomization description: Randomization will be done according to the blocks randomization method. Regarding to the sample size, 3 patients will be include in each block. Random sequences will be created by SAS software. This is a non-blinded randomized clinical trial.	COVID-19 pneumonia.	Interventional	24 March 2020	Inclusion	Immunotherapy	interferon B 1a			Tehran University of Medical Sciences	20200319	4/7/2020 10:40:56 AM	No	18 years	75 years
IRCT20200316046792N1	39	23	http://en.irct.ir/trial/46554	Inclusion	1		TCM	UCM	Asia	Iran	150	Adults	All	3	Double blind		1	1	1	Diagnosed/suspected COVID	Completed	2020-03-17	IRCT	Effect of herbal syrup and solution in treatment of COVID-19	Effect of herbal syrup and solution in t	Confirmed/suspected	Intervention 1: Intervention group: Hospitalized patients will receive 10 cc Corostop solution and 30 cc Coroguard syrup three times daily for 10 days in addition to receiving standard treatments recommended by the corona county committee. Intervention 2: Control group: Hospitalized patients will receive standard treatment according to the national guidelines for the treatment of COVID-19. Interv…	Amir Hossein Jamshidi	TCM	TCM	Response to the treatment	jamshidi.ah@iums.ac.ir	+98 21 5563 9666	Iran University of Medical Sciences	Randomization: Randomized, Blinding: Double blinded, Placebo: Not used, Assignment: Parallel, Purpose: Treatment, Randomization description: Patients will be randomized in a 1:1 ratio into one of the treatment groups and standard of care group using computer generated randomization plan. The date and time of randomization will be recorded. Allocation concealment will be done with the sealed envel…	COVID-19. <br>COVID-19;U07.1	Interventional	24 March 2020	Inclusion	Unconventional medicine	Corostop solution+Coroguard syrup	Corostop solution/Coroguard syrup		Iran University of Medical Sciences	20200317	4/7/2020 10:40:56 AM	No	18 years	65 years
JPRN-jRCTs041190120	43	24	https://jrct.niph.go.jp/latest-detail/jRCTs041190120	Inclusion	1		Favipiravir	Antiviral	Asia	Japan	86	Both	All	2	Open label		0		1	Mild/moderate	Not recruiting	02/03/2020	JPRN	Favipiravir for SARS-CoV-infected patients	Favipiravir for SARS-CoV-infected patien	Mild	Immediate favipiravir arm: Favipiravir administered orally between Day 1 and Day 10, 1800 mg twice a day on Day 1 followed by 800 mg twice a day from Day 2<br>Delayed favipiravir arm: Favipiravir administered orally between Day 6 and Day 15, 1800 mg twice a day on Day 6 followed by 800 mg twice a day from Day 7	Masashi	AV	Favipiravir	Proportion of subjects with clearance of SARS-CoV2	mkond@fujita-hu.ac.jp	+81-562-93-9407	Fujita Health University Hospital	randomized controlled trial, open(masking not used), no treatment control, parallel assignment, treatment purpose	COVID-19 infection <br>COVID-19 infection	Interventional	23 March 2020	Inclusion	AV	Favipiravir			Doi Yohei	20200302	4/7/2020 10:40:56 AM	No	>= 16age old	Not applicable
IRCT20100228003449N29	44	25	http://en.irct.ir/trial/46567	Inclusion	1		Sofosbuvir/ledipasvir	Antiviral	Asia	Iran	50	Adults	All	3	Open label		0		0	Hospitalised/Severe/ICU	Completed	2020-03-19	IRCT	Effect of sofosbuvir/ ledipasvir on COVID-19	Effect of sofosbuvir/ ledipasvir on COVI	Hospitalised	Intervention 1: Intervention group: Concomitant with the national corona treatment recommendation (Tab hydroxychloroquine 400 mg single dose + Cap oseltamivir 75 mg twice daily + Tab lopinavir/ritonavir 200/50 mg two tablets twice daily for at least 5 days), patients will receive one tablet of Sofosbuvir/ledipasvir 400/100 mg (Danesh Pharmaceutical Development Company) daily for 10 days. Interven…	Hossein Khalili	AV	Sofosbuvir/ledipasvir	rates of treatment response and adverse drug reactions	khalilih@tums.ac.ir	+98 21 6695 4715	Tehran University of Medical Sciences	Randomization: Randomized, Blinding: Not blinded, Placebo: Not used, Assignment: Parallel, Purpose: Treatment, Randomization description: Randomization will be done according to the blocks randomization method. Regarding to the sample size, 5 patients will be include in each block. SAS procedure PROC PLAN will be applied to generate the randomization schedule. This is a non-blinded randomized cli…	COVID-19 pneumonia.	Interventional	24 March 2020	Inclusion	AV	Sofosbuvir+ledipasvir			Tehran University of Medical Sciences	20200319	4/7/2020 10:40:56 AM	No	18 years	75 years
IRCT20200128046294N2	45	26	http://en.irct.ir/trial/46463	Inclusion	1		Sofosbuvir/Daclatasvir	Antiviral	Asia	Iran	70	Adults	All	1	Single blind		0		1	Hospitalised/Severe/ICU	Completed	2020-03-14	IRCT	Study to Evaluate the Safety and Efficacy of Sofosbuvir/Daclatasvir in Participants with Moderate to Severe Coronavirus Disease (COVID-19)	Study to Evaluate the Safety and Efficac	Severe	Intervention 1: Control group: Standard of care treatment according to the national guidelines for the treatment of COVID-19. Intervention 2: Intervention group: Sovodak, Company: Rojan, Daily single oral tablet containing 400mg of Sofosbovir and 60mg of Daclatasvir + Standard of care treatment.	Dr Hossein Poustchi	AV	Sofosbuvir/Daclatasvir	Clinical recovery (composite) within 14 days	h.poustchi@gmail.com	+98 21 8241 5000	Tehran University of Medical Sciences	Randomization: Randomized, Blinding: Single blinded, Placebo: Not used, Assignment: Parallel, Purpose: Treatment, Randomization description: Patients will be randomized in a 1:1 ratio into one of the treatment groups and standard of care group using computer generated randomization plan. The date and time of randomization will be recorded. Allocation concealment will be done with the sealed envel…	COVID-19. <br>COVID-19;U07.1	Interventional	24 March 2020	Inclusion	AV	Sofosbovir+Daclatasvir			Digestive Disease Research Institute	20200314	4/7/2020 10:40:56 AM	No	18 years	no limit
JPRN-jRCTs031190227	47	27	https://jrct.niph.go.jp/latest-detail/jRCTs031190227	Inclusion	1		Oseltamivir	Antiviral	Asia	Japan	50	Adults	All	1	Open label		0		1	Diagnosed/suspected COVID	Not recruiting	27/02/2020	JPRN	Triple combination therapy in patients infected with COVID-19	Triple combination therapy in patients i	N/A	oral administration of lopinavir, ritonavir and hydroxychloroquine with or without oseltamivir	Tetsuya	AV	oseltamivir	C-reactive protein	nakamurt@gunma-u.ac.jp	+81-27-220-8740	Gunma University Hospital	single arm study, open(masking not used), uncontrolled control, single assignment, treatment purpose	patients infected with COVID-19 <br>Coronavirus	Interventional	23 March 2020	UNCLEAR (with or without)	AV	oseltamivir			Tokue Yutaka	20200227	4/7/2020 10:40:56 AM	No	>= 20age old	Not applicable
NCT04254874	49	28	https://clinicaltrials.gov/show/NCT04254874	Inclusion	1		INF atomization	Other immunotherapeutics	Asia	China	100	Adults	All	4	Single blind		0		0	Diagnosed/suspected COVID	Recruiting	02/02/2020	ClinicalTrials.gov	A Prospective/Retrospective,Randomized Controlled Clinical Study of Interferon Atomization in the 2019-nCoV Pneumonia	A Prospective/Retrospective,Randomized C	Pneumonia	Drug: Abidol hydrochloride;Drug: Abidol Hydrochloride combined with Interferon atomization	;	IT	Interferon atomization	Rate of disease remission	qning@vip.sina.com;qning@vip.sina.com	+8613971521450;		Allocation: Randomized. Intervention model: Parallel Assignment. Primary purpose: Treatment. Masking: Single (Participant).	2019-nCoV	Interventional	30 March 2020	Inclusion	Immunotherapy	Interferon atomization			Tongji Hospital	20200202	4/7/2020 10:40:56 AM	No	18 Years	N/A
NCT04255017	50	29	https://clinicaltrials.gov/show/NCT04255017	Inclusion	1		Ritonavir/Lopinavir/Umifenovir/Oseltamivir	Antiviral	Asia	China	400	Adults	All	4	Single blind		0		0	Diagnosed/suspected COVID	Recruiting	02/02/2020	ClinicalTrials.gov	A Prospective/Retrospective,Randomized Controlled Clinical Study of Antiviral Therapy in the 2019-nCoV Pneumonia	A Prospective/Retrospective,Randomized C	Pneumonia	Drug: Abidol hydrochloride;Drug: Oseltamivir;Drug: Lopinavir/ritonavir	;	AV	Ritonavir/Lopinavir/Arbidol/Oseltamivir	Rate of disease remission	qning@vip.sina.com;qning@vip.sina.com	+8613971521450;		Allocation: Randomized. Intervention model: Parallel Assignment. Primary purpose: Treatment. Masking: Single (Participant).	2019-nCoV	Interventional	30 March 2020	Inclusion	AV	Abidol/Oseltamivir/Lopinavir+ritonavir			Tongji Hospital	20200202	4/7/2020 10:40:56 AM	No	18 Years	N/A
NCT04263402	51	30	https://clinicaltrials.gov/show/NCT04263402	Inclusion	1		Glucocorticoid	Glucocorticoid	Asia	China	100	Adults	All	4	Single blind		0		0	Hospitalised/Severe/ICU	Recruiting	02/02/2020	ClinicalTrials.gov	The Efficacy of Different Hormone Doses in 2019-nCoV Severe Pneumonia	The Efficacy of Different Hormone Doses	Severe	Drug: Methylprednisolone;Drug: Methylprednisolone	;	AI	Methylprednisolone	Rate of disease remission	qning@vip.sina.com;qning@vip.sina.com	+8613971521450;		Allocation: Randomized. Intervention model: Parallel Assignment. Primary purpose: Treatment. Masking: Single (Participant).	2019-nCoV Severe Pneumonia	Interventional	30 March 2020	Inclusion	Antiinflammatory	Methylprednisolone			Tongji Hospital	20200202	4/7/2020 10:40:56 AM	No	18 Years	N/A
NCT04273763	52	31	https://clinicaltrials.gov/show/NCT04273763	Inclusion	1		Bromhexine	Other	Asia	China	60	Adults	All	N/A	Open label		0		0	Diagnosed/suspected COVID	Not recruiting	14/02/2020	ClinicalTrials.gov	Evaluating the Efficacy and Safety of Bromhexine Hydrochloride Tablets Combined With Standard Treatment/ Standard Treatment in Patients With Suspected and Mild Novel Coronavirus Pneumonia (COVID-19)	Evaluating the Efficacy and Safety of Br	Confirmed/suspected	Drug: Recombinant Human Interferon a2b Spray;Drug: Arbidol Hydrochloride Granules;Drug: Bromhexine Hydrochloride Tablets		AT	Bromhexine Hydrochloride	Time to clinical recovery after treatment			The 2nd Affiliated Hospital of Wenzhou Medical University	Allocation: Randomized. Intervention model: Sequential Assignment. Primary purpose: Treatment. Masking: None (Open Label).	Novel Coronavirus Pneumonia;2019-nCoV	Interventional	30 March 2020	Inclusion	Immunotherapy/AV/Mucolytic	Recombinant Human Interferon a2b Spray/Arbidol/Bromhexine			Second Affiliated Hospital of Wenzhou Medical University	20200214	4/7/2020 10:40:56 AM	No	18 Years	80 Years
NCT04288102	55	32	https://clinicaltrials.gov/show/NCT04288102	Inclusion	1		Stem cells	Stem cells	Asia	China	90	Adults	All	2	Quadruple blind		0		0	Hospitalised/Severe/ICU	Not recruiting	24/02/2020	ClinicalTrials.gov	Treatment With Mesenchymal Stem Cells for Severe Corona Virus Disease 2019(COVID-19)	Treatment With Mesenchymal Stem Cells fo	Severe	Biological: MSCs;Biological: Saline containing 1% Human serum albumin(solution of MSC)	;	SC	Mesenchymal Stem Cells	Size of lesion area and severity of pulmonary fibrosis by chest CT	;shilei302@126.com	;86-10-66933333	The fifth medical center of PLA general hospital;	Allocation: Randomized. Intervention model: Parallel Assignment. Primary purpose: Treatment. Masking: Quadruple (Participant, Care Provider, Investigator, Outcomes Assessor).	Corona Virus Disease 2019(COVID-19)	Interventional	30 March 2020	Inclusion	Stem Cells	MSC			Beijing 302 Hospital	20200224	4/7/2020 10:40:56 AM	No	18 Years	75 Years
NCT04291053	56	33	https://clinicaltrials.gov/show/NCT04291053	Inclusion	1		TCM	UCM	Asia	China	550	Adults	All	3	Open label		0		1	Mild/moderate	Not recruiting	27/02/2020	ClinicalTrials.gov	The Efficacy and Safety of Huai er in the Adjuvant Treatment of COVID-19	The Efficacy and Safety of Huai er in th	Mild	Drug: Huaier Granule		TCM	TCM	Clinical status assessed according to the official guideline	chenlin_tj@126.com	8613517260864		Allocation: Randomized. Intervention model: Parallel Assignment. Primary purpose: Treatment. Masking: None (Open Label).	COVID-19	Interventional	30 March 2020	Inclusion	Unconventional medicine	TCM (Huaier Granule)			Tongji Hospital	20200227	4/7/2020 10:40:56 AM	No	18 Years	75 Years
NCT04261270	58	34	https://clinicaltrials.gov/show/NCT04261270	Inclusion	1		Ritonavir/ASC09F	Antiviral	Asia	China	60	Adults	All	3	Single blind		0		0	Hospitalised/Severe/ICU	Recruiting	04/02/2020	ClinicalTrials.gov	A Randomized,Open,Controlled Clinical Study to Evaluate the Efficacy of ASC09F and Ritonavir for 2019-nCoV Pneumonia	A Randomized,Open,Controlled Clinical St	Hospitalised	Drug: ASC09F+Oseltamivir;Drug: Ritonavir+Oseltamivir;Drug: Oseltamivir	;	AV	Ritonavir/ASC09F	Rate of comprehensive adverse outcome	qning@vip.sina.com;qning@vip.sina.com	+8613971521450;		Allocation: Randomized. Intervention model: Parallel Assignment. Primary purpose: Treatment. Masking: Single (Participant).	2019-nCoV Pneumonia	Interventional	30 March 2020	Inclusion	AV	ASC09/Ritonavir			Tongji Hospital	20200204	4/7/2020 10:40:56 AM	No	18 Years	55 Years
NCT04308317	62	35	https://clinicaltrials.gov/show/NCT04308317	Inclusion	1		Tetrandrine	Antiinflammatory	Asia	China	60	Adults	All	4	Open label		0		0	Diagnosed/suspected COVID	Recruiting	04/03/2020	ClinicalTrials.gov	Tetrandrine Tablets Used in the Treatment of COVID-19	Tetrandrine Tablets Used in the Treatmen	Pneumonia	Drug: Tetrandrine		AI	Tetrandrine (calcium channel blocker)	Survival rate				Allocation: Randomized. Intervention model: Parallel Assignment. Primary purpose: Treatment. Masking: None (Open Label).	Corona Virus Disease 2019,COVID-19	Interventional	30 March 2020	Inclusion	Adjunct therapy	Tetrandrine			Henan Provincial People's Hospital	20200304	4/7/2020 10:40:56 AM	No	18 Years	75 Years
NCT04310228	65	36	https://clinicaltrials.gov/show/NCT04310228	Inclusion	1		Favipiravir/Tocilizumab	Antiviral	Asia	China	150	Adults	All	N/A	Open label		1	1	1	Diagnosed/suspected COVID	Recruiting	09/03/2020	ClinicalTrials.gov	Favipiravir Combined With Tocilizumab in the Treatment of Corona Virus Disease 2019	Favipiravir Combined With Tocilizumab in	Confirmed	Drug: Favipiravir Combined With Tocilizumab;Drug: Favipiravir;Drug: Tocilizumab	;	AV	Favipiravir/Tocilizumab	Clinical cure rate	;john131212@sina.com	;13911405123	Peking University First Hospital;	Allocation: Randomized. Intervention model: Parallel Assignment. Primary purpose: Treatment. Masking: None (Open Label).	COVID-19	Interventional	30 March 2020	Inclusion	Immunotherapy/AV	Favipiravir+Tocilizumab/Favipiravir/ Tocilizumab			Peking University First Hospital	20200309	4/7/2020 10:40:56 AM	No	18 Years	65 Years
NCT04318015	66	37	https://clinicaltrials.gov/show/NCT04318015	Inclusion	1		Chloroquine	Antimalaria	North America	Mexico	400	Adults	All	3	Quadruple blind		0		0	Prevention	Recruiting	19/03/2020	ClinicalTrials.gov	Hydroxychloroquine Chemoprophylaxis in Healthcare Personnel in Contact With COVID-19 Patients (PHYDRA Trial)	Hydroxychloroquine Chemoprophylaxis in H	Prevention	Drug: Hydroxychloroquine;Drug: Placebo oral tablet	; ; ; ; ; ; ; ;	AM	Chloroquine	Symptomatic COVID-19 infection rate	;;;;;;;;lfjcamacho@comunidad.unam.mx	;;;;;;;;+52 55871700	National Institute of Respiratory Diseases - México;National Institute of Respiratory Diseases - México;National Institute of Respiratory Diseases - México;National Institute of Respiratory Diseases - México;National Institute of Respiratory Diseases - México;National Institute of Respiratory Diseases - México;National Institute of Respiratory Diseases - México;National Institute of Respiratory D…	Allocation: Randomized. Intervention model: Parallel Assignment. Primary purpose: Prevention. Masking: Quadruple (Participant, Care Provider, Investigator, Outcomes Assessor).	COVID-19;Severe Acute Respiratory Syndrome	Interventional	30 March 2020	Exclusion	Prevention				National Institute of Respiratory Diseases, Mexico	20200319	4/7/2020 10:40:56 AM	No	18 Years	N/A
NCT04315896	67	38	https://clinicaltrials.gov/show/NCT04315896	Inclusion	1		Chloroquine	Antimalaria	North America	Mexico	500	Adults	All	3	Quadruple blind	1	0	1	0	Hospitalised/Severe/ICU	Recruiting	18/03/2020	ClinicalTrials.gov	Hydroxychloroquine Treatment for Severe COVID-19 Pulmonary Infection (HYDRA Trial)	Hydroxychloroquine Treatment for Severe	Severe	Drug: Hydroxychloroquine;Drug: Placebo oral tablet	; ; ; ; ; ; ;	AM	Chloroquine	All-cause hospital mortality	;;;;;;;cmhcar@hotmail.com	;;;;;;;54871700	National Institute of Respiratory Diseases - México;National Institute of Respiratory Diseases - México;National Institute of Respiratory Diseases - México;National Institute of Respiratory Diseases - México;National Institute of Respiratory Diseases - México;National Institute of Respiratory Diseases - México;National Institute of Respiratory Diseases - México;	Allocation: Randomized. Intervention model: Parallel Assignment. Primary purpose: Treatment. Masking: Quadruple (Participant, Care Provider, Investigator, Outcomes Assessor).	COVID-19;Severe Acute Respiratory Syndrome	Interventional	30 March 2020	Inclusion	Antimalaria	Hydroxychloroquine			National Institute of Respiratory Diseases, Mexico	20200318	4/7/2020 10:40:56 AM	No	18 Years	80 Years
NCT04317040	69	39	https://clinicaltrials.gov/show/NCT04317040	Inclusion	1		CD24Fc	Other immunotherapeutics	North America	United States	230	Adults	All	3	Quadruple blind		1	1	1	Hospitalised/Severe/ICU	Recruiting	19/03/2020	ClinicalTrials.gov	CD24Fc as a Non-antiviral Immunomodulator in COVID-19 Treatment	CD24Fc as a Non-antiviral Immunomodulato	Severe	Drug: Placebo;Drug: CD24Fc	;	IT	CD24Fc	Improvement of COVID-19 disease status	;pzheng@oncoimmune.com	;(202) 7516823	Institute of Human Virology, University of Maryland Baltimore;	Allocation: Randomized. Intervention model: Parallel Assignment. Primary purpose: Treatment. Masking: Quadruple (Participant, Care Provider, Investigator, Outcomes Assessor).	Severe Coronavirus Disease (COVID-19)	Interventional	30 March 2020	Inclusion	Immunotherapy	CD24Fc			OncoImmune, Inc.	20200319	4/7/2020 10:40:56 AM	No	18 Years	N/A
NCT04292899	74	40	https://clinicaltrials.gov/show/NCT04292899	Inclusion	1		Remdesivir	Antiviral	Intercontinental	International	2400	Adults	All	3	Open label		0		1	Hospitalised/Severe/ICU	Not Recruiting	28/02/2020	ClinicalTrials.gov	Study to Evaluate the Safety and Antiviral Activity of Remdesivir (GS-5734™) in Participants With Severe Coronavirus Disease (COVID-19)	Study to Evaluate the Safety and Antivir	Severe	Drug: Remdesivir;Drug: Standard of Care	;	AV	Remdesivir	The Odds of Ratio for Improvement on a 7-point Ordinal Scale	;GileadClinicalTrials@gilead.com	;1-833-445-3230 (GILEAD-0)	Gilead Sciences;	Allocation: Randomized. Intervention model: Parallel Assignment. Primary purpose: Treatment. Masking: None (Open Label).	COVID-19	Interventional	6 April 2020	Inclusion	AV	Remdesivir			Gilead Sciences	20200228	4/7/2020 10:40:56 AM	Yes	18 Years	N/A
NCT04303507	75	41	https://clinicaltrials.gov/show/NCT04303507	Inclusion	1		Chloroquine	Antimalaria	Europe	United Kingdom	40000	Both	All	N/A	Double blind		0		0	Prevention	Not recruiting	06/03/2020	ClinicalTrials.gov	Chloroquine/ Hydroxychloroquine Prevention of Coronavirus Disease (COVID-19) in the Healthcare Setting	Chloroquine/ Hydroxychloroquine Preventi	Prevention	Drug: Chloroquine or Hydroxychloroquine;Drug: Placebo		AM	Chloroquine	Number of symptomatic COVID-19 infections	William@tropmedres.ac	+66 2 203-6333		Allocation: Randomized. Intervention model: Parallel Assignment. Primary purpose: Prevention. Masking: Double (Participant, Investigator).	COVID19;Coronavirus;Acute Respiratory Illnesses	Interventional	6 April 2020	Exclusion	Anti Malaria	Chloroquine or Hydroxychloroquine			University of Oxford	20200306	4/7/2020 10:40:56 AM	No	16 Years	N/A
NCT04306393	76	42	https://clinicaltrials.gov/show/NCT04306393	Inclusion	1		Nitric Oxide	Respiratory adjuncts (ventilator / gas)	North America	United States	200	Adults	All	2	Single blind		1	1	1	Hospitalised/Severe/ICU	Recruiting	10/03/2020	ClinicalTrials.gov	Nitric Oxide Gas Inhalation in Severe Acute Respiratory Syndrome in COVID-19	Nitric Oxide Gas Inhalation in Severe Ac	Severe	Drug: Nitric Oxide Gas	; ;	AT	Nitric Oxide Gas	Change of arterial oxygenation at 48 hours from enrollment	;lberra@mgh.harvard.edu;	;+16176437733;	Massachusetts General Hospital;	Allocation: Randomized. Intervention model: Parallel Assignment. Primary purpose: Treatment. Masking: Single (Participant).	SARS (Severe Acute Respiratory Syndrome);Coronavirus	Interventional	6 April 2020	Inclusion	Adjunct therapy	NO			Massachusetts General Hospital	20200310	4/7/2020 10:40:56 AM	No	18 Years	99 Years
NCT04298060	78	43	https://clinicaltrials.gov/show/NCT04298060	Inclusion	1		DAS181	Antiviral	Asia	China	280	Adults	All	2	Triple blind		0		1	Hospitalised/Severe/ICU	Not recruiting	28/02/2020	ClinicalTrials.gov	DAS181 for Patients With Severe Hospitalized Flu and SAD-RVs (COVID-19)	DAS181 for Patients With Severe Hospital	Severe	Drug: DAS181;Drug: Placebo	;	AV	DAS181	Percent of subjects who have returned to room air	;ifan@ansunbiopharma.com	;+86 186 2190 9313	Ansun Biopharma, Inc.;	Allocation: Randomized. Intervention model: Parallel Assignment. Primary purpose: Treatment. Masking: Triple (Participant, Care Provider, Investigator).	Influenza Infection;SAD-RV Infection and COVID-19	Interventional	6 April 2020	Inclusion	AV	DAS181			Ansun Biopharma, Inc.	20200228	4/7/2020 10:40:56 AM	No	18 Years	N/A
NCT04304053	79	44	https://clinicaltrials.gov/show/NCT04304053	Inclusion	1		Chloroquine + other	Antimalaria_antiviral/antibiotic	Europe	Spain	3040	Adults	All	3	Open label		1	1	0	Prevention	Not Recruiting	05/03/2020	ClinicalTrials.gov	Treatment of COVID-19 Cases and Chemoprophylaxis of Contacts as Prevention	Treatment of COVID-19 Cases and Chemopro	Prevention	Drug: Antiviral treatment and prophylaxis;Other: Standard Public Health measures		AM/AV	Chloroquine/darunavir/cobicistat	Incidence of secondary cases among contacts of a case and contacts of contacts	oriolmitja@hotmail.com	0034 934651072		Allocation: Randomized. Intervention model: Parallel Assignment. Primary purpose: Prevention. Masking: None (Open Label).	COVID-19	Interventional	6 April 2020	Exclusion	Prevention				Fundacio Lluita Contra la SIDA	20200305	4/7/2020 10:40:56 AM	No	18 Years	N/A
NCT04308668	80	45	https://clinicaltrials.gov/show/NCT04308668	Inclusion	1		Chloroquine	Antimalaria	North America	International	3000	Adults	All	3	Quadruple blind		1	1	0	Prevention	Completed	11/03/2020	ClinicalTrials.gov	Post-exposure Prophylaxis / Preemptive Therapy for SARS-Coronavirus-2	Post-exposure Prophylaxis / Preemptive T	Prevention	Drug: Hydroxychloroquine;Other: Placebo	;	AM	Chloroquine	Incidence of COVID19 Disease among those who are asymptomatic at trial entry	;covid19@umn.edu	;6126249996	University of Minnesota;	Allocation: Randomized. Intervention model: Parallel Assignment. Primary purpose: Treatment. Masking: Quadruple (Participant, Care Provider, Investigator, Outcomes Assessor).	Corona Virus Infection;Acute Respiratory Distress Syndrome;SARS-CoV Infection;Coronavirus;Coronavirus Infections	Interventional	6 April 2020	UNCLEAR (Prevention?)	Anti Malaria	Hydroxychloroquine			University of Minnesota	20200311	4/7/2020 10:40:56 AM	No	18 Years	N/A
NCT04280705	82	46	https://clinicaltrials.gov/show/NCT04280705	Inclusion	1		Remdesivir	Antiviral	Intercontinental	International	440	Adults	All	3	Double blind		1	1	1	Hospitalised/Severe/ICU	Recruiting	20/02/2020	ClinicalTrials.gov	Adaptive COVID-19 Treatment Trial (ACTT)	Adaptive COVID-19 Treatment Trial (ACTT)	Hospitalised	Other: Placebo;Drug: Remdesivir		AV	Remdesivir	Percentage of subjects reporting each severity rating on an 8-point ordinal scale [ Time Frame: Day 15 ]	DMIDClinicalTrials@niaid.nih.gov	13017617948		Allocation: Randomized. Intervention model: Parallel Assignment. Primary purpose: Treatment. Masking: Double (Participant, Investigator).	Corona Virus Infection	Interventional	6 April 2020	Inclusion	AV	Remdesivir			National Institute of Allergy and Infectious Diseases (NIAID)	20200220	4/7/2020 10:40:56 AM	Yes	18 Years	99 Years
NCT04305457	84	47	https://clinicaltrials.gov/show/NCT04305457	Inclusion	1		Nitric Oxide	Respiratory adjuncts (ventilator / gas)	North America	United States	240	Adults	All	2	Open label		1	1	0	Hospitalised/Severe/ICU	Recruiting	09/03/2020	ClinicalTrials.gov	Nitric Oxide Gas Inhalation Therapy for Mild/Moderate COVID-19	Nitric Oxide Gas Inhalation Therapy for	Hospitalised	Drug: Nitric Oxide	;	AT	Nitric Oxide Gas	Reduction in the incidence of patients with mild/moderate COVID-19	lberra@mgh.harvard.edu;lberra@mgh.harvard.edu	+16176437733;		Allocation: Randomized. Intervention model: Parallel Assignment. Primary purpose: Treatment. Masking: None (Open Label).	Coronavirus Infections;Pneumonia, Viral;Acute Respiratory Distress Syndrome	Interventional	6 April 2020	Inclusion	Adjunct therapy	NO			Massachusetts General Hospital	20200309	4/7/2020 10:40:56 AM	No	18 Years	N/A
NCT04312243	85	48	https://clinicaltrials.gov/show/NCT04312243	Inclusion	1		Nitric Oxide	Respiratory adjuncts (ventilator / gas)	North America	United States	470	Adults	All	2	Open label		0		0	Prevention	Recruiting	15/03/2020	ClinicalTrials.gov	NO Prevention of COVID-19 for Healthcare Providers	NO Prevention of COVID-19 for Healthcare	Prevention	Drug: Inhaled nitric oxide gas		AT	NO	COVID-19 diagnosis	lberra@mgh.harvard.edu	16176437733		Allocation: Randomized. Intervention model: Parallel Assignment. Primary purpose: Prevention. Masking: None (Open Label).	Coronavirus Infections;Healthcare Associated Infection	Interventional	6 April 2020	Exclusion	Prevention				Massachusetts General Hospital	20200315	4/7/2020 10:40:56 AM	No	18 Years	99 Years
NCT04313023	86	49	https://clinicaltrials.gov/show/NCT04313023	Inclusion	1		PUL-042	Other immunotherapeutics	N/A	N/A	200	Adults	All	2	Quadruple blind		0		0	Prevention	Recruiting	16/03/2020	ClinicalTrials.gov	The Use PUL-042 Inhalation Solution to Prevent COVID-19 in Adults Exposed to SARS-CoV-2	The Use PUL-042 Inhalation Solution to P	Prevention	Drug: PUL-042 Inhalation Solution;Drug: Placebo	;	IT	PUL-042	Difference in the incidence of infection with SARS-CoV-2	;clinicaltrials@pulmotect.com	;713-579-9226	Pulmotect, Inc.;	Allocation: Randomized. Intervention model: Parallel Assignment. Primary purpose: Prevention. Masking: Quadruple (Participant, Care Provider, Investigator, Outcomes Assessor).	COVID-19	Interventional	6 April 2020	Exclusion	Prevention				Pulmotect, Inc.	20200316	4/7/2020 10:40:56 AM	No	18 Years	N/A
NCT04315298	87	50	https://clinicaltrials.gov/show/NCT04315298	Inclusion	1		Sarilumab	Anti-IL-6	North America	United States	400	Adults	All	3	Quadruple blind		1	1	1	Hospitalised/Severe/ICU	Recruiting	15/03/2020	ClinicalTrials.gov	Evaluation of the Efficacy and Safety of Sarilumab in Hospitalized Patients With COVID-19	Evaluation of the Efficacy and Safety of	Hospitalised	Drug: Sarilumab;Drug: Placebo	;	IT	Sarilumab	Percent change in C-reactive protein (CRP) levels	;clinicaltrials@regeneron.com	;844-734-6643	Regeneron Pharmaceuticals;	Allocation: Randomized. Intervention model: Parallel Assignment. Primary purpose: Treatment. Masking: Quadruple (Participant, Care Provider, Investigator, Outcomes Assessor).	COVID-19	Interventional	6 April 2020	Inclusion	Immunotherapy	Sarilumab			Regeneron Pharmaceuticals	20200315	4/7/2020 10:40:56 AM	No	18 Years	N/A
NCT04311697	89	51	https://clinicaltrials.gov/show/NCT04311697	Inclusion	1		Aviptadil	Other immunotherapeutics	Intercontinental	International	120	Adults	All	2	Quadruple blind	1	0	1	1	Hospitalised/Severe/ICU	Recruiting	14/03/2020	ClinicalTrials.gov	Intravenous Aviptadil for COVID-19 Associated Acute Respiratory Distress	Intravenous Aviptadil for COVID-19 Assoc	ICU	Drug: Aviptadil by intravenous infusion + maximal intensive care;Drug: Normal Saline Infusion + Maximal intensive care	; ;	IT	Aviptadil	Mortality	;rbesthof@neurorxpharma.com;y_barlavie@rambam.health.gov.il	;+14842546134;04-777-2601	Relief Therapeutics;	Allocation: Randomized. Intervention model: Parallel Assignment. Primary purpose: Treatment. Masking: Quadruple (Participant, Care Provider, Investigator, Outcomes Assessor).	Acute Respiratory Distress Syndrome;Acute Lung Injury/Acute Respiratory Distress Syndrome (ARDS);Corona Virus Infection	Interventional	6 April 2020	Inclusion	Adjunct therapy	Aviptadil			NeuroRx, Inc.	20200314	4/7/2020 10:40:56 AM	No	18 Years	100 Years
NCT04312009	90	52	https://clinicaltrials.gov/show/NCT04312009	Inclusion	1		Losartan	Antihypertensiva	North America	United States	200	Adults	All	2	Quadruple blind		1	1	1	Hospitalised/Severe/ICU	Recruiting	13/03/2020	ClinicalTrials.gov	Losartan for Patients With COVID-19 Requiring Hospitalization	Losartan for Patients With COVID-19 Requ	Hospitalised	Drug: Losartan;Other: Placebo	; ;	Other	losartan	Sequential Organ Failure Assessment (SOFA) Respiratory Score	;;Covid19trial@umn.edu	;;612-624-4373	University of Minnesota;University of Minnesota;	Allocation: Randomized. Intervention model: Parallel Assignment. Primary purpose: Treatment. Masking: Quadruple (Participant, Care Provider, Investigator, Outcomes Assessor).	Corona Virus Infection;Acute Respiratory Distress Syndrome;SARS-CoV Infection	Interventional	6 April 2020	Inclusion	Adjunct therapy	Lorsartan			University of Minnesota	20200313	4/7/2020 10:40:56 AM	No	18 Years	N/A
NCT04316377	91	53	https://clinicaltrials.gov/show/NCT04316377	Inclusion	1		Chloroquine	Antimalaria	Europe	Norway	202	Adults	All	4	Open label		1	1	0	Hospitalised/Severe/ICU	Not recruiting	13/03/2020	ClinicalTrials.gov	Norwegian Coronavirus Disease 2019 Study	Norwegian Coronavirus Disease 2019 Study	Hospitalised	Drug: Hydroxychloroquine Sulfate	; ;	AM	Chloroquine	Rate of decline in SARS-CoV-2 viral load	;odalgard@uio.no;odalgard@uio.no	;+47 92616800;+47 92 61 68 00	Akerhus University Hospital;	Allocation: Randomized. Intervention model: Parallel Assignment. Primary purpose: Treatment. Masking: None (Open Label).	Corona Virus Infection	Interventional	6 April 2020	Inclusion	Anti Malaria	Hydroxychloroquine			University Hospital, Akershus	20200313	4/7/2020 10:40:56 AM	No	18 Years	N/A
NCT04318444	92	54	https://clinicaltrials.gov/show/NCT04318444	Inclusion	1		Chloroquine	Antimalaria	North America	United States	1600	Adults	All	3	Quadruple blind		0		0	Prevention	Recruiting	20/03/2020	ClinicalTrials.gov	Hydroxychloroquine Post Exposure Prophylaxis for Coronavirus Disease (COVID-19)	Hydroxychloroquine Post Exposure Prophyl	Prevention	Drug: Hydroxychloroquine;Drug: Placebo oral tablet	;	AM	Chloroquine	Number of participants with symptomatic, lab-confirmed COVID-19	;eco7@cumc.columbia.edu	;212-305-9056	Columbia University Irving Medical Center;	Allocation: Randomized. Intervention model: Parallel Assignment. Primary purpose: Prevention. Masking: Quadruple (Participant, Care Provider, Investigator, Outcomes Assessor).	COVID-19;Corona Virus Infection	Interventional	6 April 2020	UNCLEAR (Prevention?)	Anti Malaria	Hydroxychloroquine			Columbia University	20200320	4/7/2020 10:40:56 AM	No	18 Years	N/A
NCT04311177	93	55	https://clinicaltrials.gov/show/NCT04311177	Inclusion	1		Losartan	Antihypertensiva	North America	United States	516	Adults	All	2	Quadruple blind		0		1	Mild/moderate	Recruiting	13/03/2020	ClinicalTrials.gov	Losartan for Patients With COVID-19 Not Requiring Hospitalization	Losartan for Patients With COVID-19 Not	Mild	Drug: Losartan;Other: Placebo	; ;	Other	losartan	Hospital Admission	;;Covid19trial@umn.edu	;;612-624-4373	University of Minnesota;University of Minnesota;	Allocation: Randomized. Intervention model: Parallel Assignment. Primary purpose: Treatment. Masking: Quadruple (Participant, Care Provider, Investigator, Outcomes Assessor).	Corona Virus Infection;Acute Respiratory Distress Syndrome;SARS-CoV Infection	Interventional	6 April 2020	Inclusion	Adjunct therapy	Lorsartan			University of Minnesota	20200313	4/7/2020 10:40:56 AM	No	18 Years	N/A
NCT04312997	94	56	https://clinicaltrials.gov/show/NCT04312997	Inclusion	1		PUL-042	Other immunotherapeutics	North America	United States	100	Adults	All	2	Quadruple blind		1	1	0	Hospitalised/Severe/ICU	Recruiting	16/03/2020	ClinicalTrials.gov	The Use of PUL-042 Inhalation Solution to Reduce the Severity of COVID-19 in Adults Positive for SARS-CoV-2 Infection	The Use of PUL-042 Inhalation Solution t	Hospitalised	Drug: PUL-042 Inhalation Solution;Drug: Placebo	;	IT	PUL-042	Severity of COVID-19	;clinicaltrials@pulmotect.com	;713-579-9226	Pulmotect, Inc.;	Allocation: Randomized. Intervention model: Parallel Assignment. Primary purpose: Treatment. Masking: Quadruple (Participant, Care Provider, Investigator, Outcomes Assessor).	COVID-19	Interventional	6 April 2020	Inclusion	Immunotherapy	PUL-042 Inhalation			Pulmotect, Inc.	20200316	4/7/2020 10:40:56 AM	No	18 Years	N/A
NCT04315948	96	57	https://clinicaltrials.gov/show/NCT04315948	Inclusion	1		Chloroquine + other	Other drug combinations	Europe	France	3100	Adults	All	3	Open label		1	1	1	Hospitalised/Severe/ICU	Recruiting	13/03/2020	ClinicalTrials.gov	Trial of Treatments for COVID-19 in Hospitalized Adults	Trial of Treatments for COVID-19 in Hosp	Hospitalised	Drug: Remdesivir;Drug: Lopinavir/ritonavir;Drug: Interferon Beta-1A;Drug: Hydroxychloroquine;Other: Standard of care	;	AV/IT/AM	Remdesivir/Lopinavir/ritonavir/ Interferon Beta-1A/Hydroxychloroquine	Severity rate	;florence.ader@chu-lyon.fr	;+33 (0)4 72 07 15 60	Hospices Civils de Lyon;	Allocation: Randomized. Intervention model: Parallel Assignment. Primary purpose: Treatment. Masking: None (Open Label).	Corona Virus Infection	Interventional	6 April 2020	Inclusion	AV/Anti malaria	Remdesivir/Lopinavir+ritonavir/Interferon Beta-1A/Hydroxychloroquine			Institut National de la Santé Et de la Recherche Médicale, France	20200313	4/7/2020 10:40:56 AM	No	18 Years	N/A
NCT04320056	98	58	https://clinicaltrials.gov/show/NCT04320056	Inclusion	1		Automated oxygen administration	Respiratory adjuncts (ventilator / gas)	North America	Canada	216	Adults	All	N/A	Open label		0		0	Hospitalised/Severe/ICU	Recruiting	19/03/2020	ClinicalTrials.gov	Closed-Loop Oxygen to Verify That Healthcare Workers Interventions Decrease During Pneumonia	Closed-Loop Oxygen to Verify That Health	Severe	Other: Standard administration of oxygen flow;Device: Automated oxygen administration - FreeO2		AT	Automated oxygen administration	The number of interventions	francois.lellouche@criucpq.ulaval.ca	418-656-8711		Allocation: Randomized. Intervention model: Parallel Assignment. Primary purpose: Other. Masking: None (Open Label).	Coronavirus;Pneumonia;Oxygen Toxicity	Interventional	6 April 2020	Inclusion	Adjunct therapy	Closed-loop oxygen			Laval University	20200319	4/7/2020 10:40:56 AM	No	18 Years	N/A
NCT04319900	103	59	https://clinicaltrials.gov/show/NCT04319900	Inclusion	1		Chloroquine	Antimalaria	Asia	China	150	Adults	All	3	Double blind		0		1	Diagnosed/suspected COVID	Recruiting	20/03/2020	ClinicalTrials.gov	Clinical Trial of Favipiravir Tablets Combine With Chloroquine Phosphate in the Treatment of Novel Coronavirus Pneumonia	Clinical Trial of Favipiravir Tablets Co	Confirmed	Drug: favipiravir tablets+chloroquine phosphatetablets tablets;Drug: Favipiravir tablets;Drug: Placebo	;	AM	Chloroquine	Time of Improvement or recovery of respiratory symptoms	shuminwang7000@163.com;shuminwang7000@163.com	+86 13488760399;+86 13488760399		Allocation: Randomized. Intervention model: Parallel Assignment. Primary purpose: Treatment. Masking: Double (Participant, Care Provider).	Novel Coronavirus Pnuemonia	Interventional	6 April 2020	Inclusion	AV/Anti malaria	favipiravir+chloroquine/Favipiravir/Placebo			Beijing Chao Yang Hospital	20200320	4/7/2020 10:40:56 AM	No	18 Years	75 Years
NCT04322123	104	60	https://clinicaltrials.gov/show/NCT04322123	Inclusion	1		Chloroquine / Azithromycin	Antimalaria_antiviral/antibiotic	South America	Brazil	630	Adults	All	3	Open label		1	1	0	Hospitalised/Severe/ICU	Not recruiting	24/03/2020	ClinicalTrials.gov	Safety and Efficacy of Hydroxychloroquine Associated With Azythromycin in SARS-Cov-2 Virus	Safety and Efficacy of Hydroxychloroquin	Hospitalised	Drug: Hydroxychloroquine Oral Product;Drug: Hydroxychloroquine + azithromycin	;	AB	azithromycin	Evaluation of the clinical status	;fzampieri@hcor.com.br	;+55 11 97093-1539	Hospital do Coração;	Allocation: Randomized. Intervention model: Parallel Assignment. Primary purpose: Treatment. Masking: None (Open Label).	Coronavirus Infections	Interventional	6 April 2020	Inclusion	Antibiotic	azithromycin			Hospital do Coracao	20200324	4/7/2020 10:40:56 AM	No	18 Years	N/A
NCT04324073	105	61	https://clinicaltrials.gov/show/NCT04324073	Inclusion	1		Sarilumab	Anti-IL-6	Europe	France	240	Adults	All	3	Open label		0		0	Mild/moderate	Not recruiting	25/03/2020	ClinicalTrials.gov	Cohort Multiple Randomized Controlled Trials Open-label of Immune Modulatory Drugs and Other Treatments in COVID-19 Patients - Sarilumab Trial - CORIMUNO-19 - SARI	Cohort Multiple Randomized Controlled Tr	Moderate	Drug: Sarilumab		IT	Sarilumab	Survival without needs of ventilator utilization at day 14	ohermine@gmail.com	603707920		Allocation: Randomized. Intervention model: Parallel Assignment. Primary purpose: Treatment. Masking: None (Open Label).	Corona Virus Infection	Interventional	6 April 2020	Inclusion	Immunotherapy	Sarilumab			Assistance Publique - Hôpitaux de Paris	20200325	4/7/2020 10:40:56 AM	No	18 Years	N/A
NCT04321174	108	62	https://clinicaltrials.gov/show/NCT04321174	Inclusion	1		Ritonavir/Lopinavir	Antiviral	North America	Canada	1220	Both	All	3	Single blind		1	1	0	Prevention	Recruiting	18/03/2020	ClinicalTrials.gov	COVID-19 Ring-based Prevention Trial With Lopinavir/Ritonavir	COVID-19 Ring-based Prevention Trial Wit	Prevention	Drug: Lopinavir/ritonavir	; ;	AV	Ritonavir/Lopinavir	Microbiologic evidence of infection	;Attia.Qamar@unityhealth.to;adrienne.chan@sunnybrook.ca	;416-864-6060;	St. Michael's Hospital, Toronto;	Allocation: Randomized. Intervention model: Parallel Assignment. Primary purpose: Prevention. Masking: Single (Outcomes Assessor).	Coronavirus Infections;Post-exposure Prophylaxis	Interventional	6 April 2020	Exclusion	Prevention				Darrell Tan	20200318	4/7/2020 10:40:56 AM	No	18 Months	N/A
NCT04322565	109	63	https://clinicaltrials.gov/show/NCT04322565	Inclusion	1		Colchicine	Antiinflammatory	Europe	Italy	100	Adults	All	2	Open label		1	1	0	Mild/moderate	Recruiting	24/03/2020	ClinicalTrials.gov	Colchicine Efficacy in COVID-19 Pneumonia	Colchicine Efficacy in COVID-19 Pneumoni	Moderate	Drug: Colchicine		AI	Colchicine	Clinical improvement	lmanenti@ao.pr.it	393400732913		Allocation: Randomized. Intervention model: Parallel Assignment. Primary purpose: Treatment. Masking: None (Open Label).	Coronavirus Infections;Pneumonia, Viral	Interventional	6 April 2020	Inclusion	Antiinflammatory	Colchicine			Lucio Manenti	20200324	4/7/2020 10:40:56 AM	No	18 Years	85 Years
NCT04322773	110	64	https://clinicaltrials.gov/show/NCT04322773	Inclusion	1		Tocilizumab/Sarilumab	Anti-IL-6	Europe	Denmark	200	Adults	All	2	Open label		1	1	1	Hospitalised/Severe/ICU	Recruiting	24/03/2020	ClinicalTrials.gov	Anti-il6 Treatment of Serious COVID-19 Disease With Threatening Respiratory Failure	Anti-il6 Treatment of Serious COVID-19 D	Moderate	Drug: RoActemra iv;Drug: RoActemra sc;Drug: Kevzara sc;Other: Standard medical care	; ;	IT	Tocilizumab/Sarilumab	Time to independence from supplementary oxygen therapy	;lars.erik.kristensen@regionh.dk;lars.erik.kristensen@regionh.dk	;0045 38164157;0045 38164157	The Parker Institute;	Allocation: Randomized. Intervention model: Sequential Assignment. Primary purpose: Treatment. Masking: None (Open Label).	Corona Virus Disease	Interventional	6 April 2020	UNCLEAR (sequential assignment) : AK: cluster randomization	Immunotherapy	RoActemra/Kevzara			Marius Henriksen	20200324	4/7/2020 10:40:56 AM	No	18 Years	N/A
NCT04261517	112	65	https://clinicaltrials.gov/show/NCT04261517	Inclusion	1		Chloroquine	Antimalaria	Asia	China	30	Adults	All	3	Open label	1	0	1	0	Diagnosed/suspected COVID	Completed	06/02/2020	ClinicalTrials.gov	Efficacy and Safety of Hydroxychloroquine for Treatment of Pneumonia Caused by 2019-nCoV ( HC-nCoV )	Efficacy and Safety of Hydroxychloroquin	Pneumonia	Drug: Hydroxychloroquine		AM	Chloroquine	Mortality				Allocation: Randomized. Intervention model: Parallel Assignment. Primary purpose: Treatment. Masking: None (Open Label).	Pneumonia, Pneumocystis;Coronavirus	Interventional	6 April 2020	Inclusion	Anti Malaria	Hydroxychloroquine			Shanghai Public Health Clinical Center	20200206	4/7/2020 10:40:56 AM	No	18 Years	N/A
NCT04292730	114	66	https://clinicaltrials.gov/show/NCT04292730	Inclusion	1		Remdesivir	Antiviral	Intercontinental	International	600	Adults	All	3	Open label		0		1	Hospitalised/Severe/ICU	Not recruiting	28/02/2020	ClinicalTrials.gov	Study to Evaluate the Safety and Antiviral Activity of Remdesivir (GS-5734™) in Participants With Moderate Coronavirus Disease (COVID-19) Compared to Standard of Care Treatment	Study to Evaluate the Safety and Antivir	Severe	Drug: Remdesivir;Drug: Standard of Care	;	AV	Remdesivir	The Odds of Ratio for Improvement on a 7-point Ordinal Scale on Day 11	;GileadClinicalTrials@gilead.com	;1-833-445-3230 (GILEAD-0)	Gilead Sciences;	Allocation: Randomized. Intervention model: Parallel Assignment. Primary purpose: Treatment. Masking: None (Open Label).	COVID-19	Interventional	6 April 2020	Inclusion	AV	Remdesivir			Gilead Sciences	20200228	4/7/2020 10:40:56 AM	Yes	18 Years	N/A
NCT04324606	116	67	https://clinicaltrials.gov/show/NCT04324606	Inclusion	1		Vaccine COV001	Vaccine	Europe	United Kingdom	1112	Adults	All	2	Single blind		0		1	Prevention	Not recruiting	20/03/2020	ClinicalTrials.gov	A Study of a Candidate COVID-19 Vaccine (COV001)	A Study of a Candidate COVID-19 Vaccine	Prevention	Biological: ChAdOx1 nCoV-19;Other: Saline Placebo	;	Vaccine	COV001 (candidate vaccine)	Assess efficacy of the candidate ChAdOx1	;vaccinetrials@ndm.ox.ac.uk	;01865 611424	University of Oxford;	Allocation: Randomized. Intervention model: Sequential Assignment. Primary purpose: Treatment. Masking: Single (Participant).	Coronavirus	Interventional	6 April 2020	Exclusion	Vaccination				University of Oxford	20200320	4/7/2020 10:40:56 AM	No	18 Years	55 Years
NCT04325906	117	68	https://clinicaltrials.gov/show/NCT04325906	Inclusion	1		Prone position	Respiratory adjuncts (ventilator / gas)	North America	United States	346	Adults	All	N/A	Open label		0		0	Hospitalised/Severe/ICU	Recruiting	26/03/2020	ClinicalTrials.gov	Early PP With HFNC Versus HFNC in COVID-19 Induced Moderate to Severe ARDS	Early PP With HFNC Versus HFNC in COVID-	Severe	Device: high flow nasal cannula (HFNC);Procedure: Prone positioning (PP)	;	AT	Prone positioning (PP)	Treatment failure	;Jie_Li@rush.edu	;312-947-0065	Rush University Medical Center;	Allocation: Randomized. Intervention model: Parallel Assignment. Primary purpose: Treatment. Masking: None (Open Label).	Prone Positioning;High Flow Nasal Cannula;Acute Respiratory Distress Syndrome;Corona Virus Infection	Interventional	6 April 2020	Inclusion	Adjunct therapy	Prone positioning			Rush University Medical Center	20200326	4/7/2020 10:40:56 AM	No	18 Years	N/A
NCT04321616	120	69	https://clinicaltrials.gov/show/NCT04321616	Inclusion	1		Chloroquine + other	Antimalaria_antiviral/antibiotic	Europe	Norway	700	Adults	All	3	Open label	1	0	1	1	Hospitalised/Severe/ICU	Recruiting	23/03/2020	ClinicalTrials.gov	The Efficacy of Different Anti-viral Drugs in (Severe Acute Respiratory Syndrome-Corona Virus-2) SARS-CoV-2	The Efficacy of Different Anti-viral Dru	Hospitalised	Drug: Hydroxychloroquine;Drug: Remdesivir;Other: (Standard of Care) SoC	; ; ; ; ; ; ;	AM/AV	Chloroquine/Remdesivir	Mortality	;;;;;;;paukrust@ous-hf.no	;;;;;;;0047 46778374	Oslo University Hospital;Oslo University Hospital;Oslo University Hospital;Oslo Hospital Pharmacies;Oslo University Hospital;Oslo University Hospital;NorCRIN;	Allocation: Randomized. Intervention model: Parallel Assignment. Primary purpose: Treatment. Masking: None (Open Label).	SARS-CoV Infection;COVID 19;Acute Respiratory Distress Syndrome ARDS	Interventional	6 April 2020	Inclusion	AV/Anti malaria	Hydroxychloroquine/Remdesivir			Oslo University Hospital	20200323	4/7/2020 10:40:56 AM	No	18 Years	N/A
NCT04323631	122	70	https://clinicaltrials.gov/show/NCT04323631	Inclusion	1		Chloroquine	Antimalaria	Asia	Israel	1116	Adults	All	1	Open label	1	0	1	1	Mild/moderate	Not recruiting	25/03/2020	ClinicalTrials.gov	Hydroxychloroquine for the Treatment of Patients With Mild to Moderate COVID-19 to Prevent Progression to Severe Infection or Death	Hydroxychloroquine for the Treatment of	Moderate	Drug: Hydroxychloroquine;Other: The control group will not receive hydroxychloroquine	;	AM	Chloroquine	Mortality	;M_paul@rambam.health.gov.il	;+972-50-2062140	Rambam MC;	Allocation: Randomized. Intervention model: Sequential Assignment. Primary purpose: Treatment. Masking: None (Open Label).	COVID-19	Interventional	6 April 2020	Inclusion	Anti Malaria	Hydroxychloroquine			Rambam Health Care Campus	20200325	4/7/2020 10:40:56 AM	No	18 Years	N/A
NCT04324528	123	71	https://clinicaltrials.gov/show/NCT04324528	Inclusion	1		Cytokine adsorption	Other	Europe	Germany	30	Adults	All	N/A	Open label		1	1	0	Hospitalised/Severe/ICU	Recruiting	25/03/2020	ClinicalTrials.gov	Cytokine Adsorption in Severe COVID-19 Pneumonia Requiring Extracorporeal Membrane Oxygenation	Cytokine Adsorption in Severe COVID-19 P	Severe	Device: vv-ECMO + cytokine adsorption (Cytosorb adsorber);Device: vv-ECMO only (no cytokine adsorption)	; ;	AT	cytokine adsorption	interleukin-6 (IL-6) level after 72 hours	;alexander.supady@universitaets-herzzentrum.de;	;+49761270;	University Clinic Freiburg;	Allocation: Randomized. Intervention model: Single Group Assignment. Primary purpose: Treatment. Masking: None (Open Label).	Coronavirus;COVID-19;SARS-CoV Infection;Respiratory Failure;Cytokine Storm	Interventional	6 April 2020	Inclusion	Immunotherapy	cytokine adsorption (Cytosorb adsorber)			Dr. Alexander Supady	20200325	4/7/2020 10:40:56 AM	No	18 Years	100 Years
NCT04305106	124	72	https://clinicaltrials.gov/show/NCT04305106	Inclusion	1		Bevacizumab	Other immunotherapeutics	Asia	China	140	Adults	All	N/A	Triple blind		0		1	Hospitalised/Severe/ICU	Recruiting	09/03/2020	ClinicalTrials.gov	Bevacizumab in Severe or Critically Severe Patients With COVID-19 Pneumonia-RCT	Bevacizumab in Severe or Critically Seve	Severe	Drug: Bevacizumab	; ; ;	IT	Bevacizumab	Time to Clinical Improvement	;;jiaojiaopang@126.com;jiaojiaopang@126.com	;;18560089129;+86 18560089129	Qilu Hospital of Shandong University, Karolinska Institutet;Qilu Hospital of Shandong University;	Allocation: Randomized. Intervention model: Parallel Assignment. Primary purpose: Treatment. Masking: Triple (Participant, Care Provider, Outcomes Assessor).	COVID-19 Pneumonia	Interventional	6 April 2020	Inclusion	Immunotherapy	Bevacizumab			Qilu Hospital of Shandong University	20200309	4/7/2020 10:40:56 AM	No	18 Years	80 Years
NCT04320615	125	73	https://clinicaltrials.gov/show/NCT04320615	Inclusion	1		Tocilizumab	Anti-IL-6	N/A	N/A	330	Adults	All	3	Double blind		1	1	1	Hospitalised/Severe/ICU	Not recruiting	23/03/2020	ClinicalTrials.gov	A Study to Evaluate the Safety and Efficacy of Tocilizumab in Patients With Severe COVID-19 Pneumonia	A Study to Evaluate the Safety and Effic	Severe	Drug: Tocilizumab (TCZ);Drug: Placebo	;	IT	Tocilizumab	Clinical status	;global-roche-genentech-trials@gene.com	;888-662-6728	Hoffmann-La Roche;	Allocation: Randomized. Intervention model: Parallel Assignment. Primary purpose: Treatment. Masking: Double (Participant, Investigator).	COVID-19 Pneumonia	Interventional	6 April 2020	Inclusion	Immunotherapy	Tocilizumab			Hoffmann-La Roche	20200323	4/7/2020 10:40:56 AM	Yes	18 Years	N/A
NCT04326790	126	74	https://clinicaltrials.gov/show/NCT04326790	Inclusion	1		Colchicine	Antiinflammatory	Europe	Greece	180	Adults	All	2	Open label		0		0	Diagnosed/suspected COVID	Recruiting	26/03/2020	ClinicalTrials.gov	The GReek Study in the Effects of Colchicine in Covid-19 cOmplications Prevention	The GReek Study in the Effects of Colchi	Confirmed	Drug: Colchicine;Drug: Standard treatment		AI	Colchicine	CRP increase to 3 x upper limit of normal AND Clinical deterioration in the semiquantitative ordinal scale AND Maximal concentration of cardiac troponin	spdeftereos@gmail.com	306944699901		Allocation: Randomized. Intervention model: Parallel Assignment. Primary purpose: Treatment. Masking: None (Open Label).	Corona Virus Disease 19 (Covid 19)	Interventional	6 April 2020	Inclusion	Antiinflammatory	Colchicine			National and Kapodistrian University of Athens	20200326	4/7/2020 10:40:56 AM	Yes	18 Years	N/A
NCT04327206	127	75	https://clinicaltrials.gov/show/NCT04327206	Inclusion	1		BCG vaccine	Vaccine	Australasia	Australia	4170	Adults	All	3	Open label		1	1	1	Prevention	Recruiting	25/03/2020	ClinicalTrials.gov	BCG Vaccination to Protect Healthcare Workers Against COVID-19	BCG Vaccination to Protect Healthcare Wo	Prevention	Drug: BCG Vaccine	; ;	Vaccine	Preventive BCG (Tuberculosis) vaccination study	Incidence of participants with symptomatic, lab-confirmed COVID-19 AND incidence of severe COVID-19	;nigel.curtis@rch.org.au;nigel.curtis@mcri.edu.au	;93456366;9345 6366	Murdoch Children's Research Institute;	Allocation: Randomized. Intervention model: Parallel Assignment. Primary purpose: Prevention. Masking: None (Open Label).	Coronavirus Disease 2019 (COVID-19);Febrile Respiratory Illness;Corona Virus Infection;COVID-19	Interventional	6 April 2020	Exclusion	Vaccination				Murdoch Childrens Research Institute	20200325	4/7/2020 10:40:56 AM	No	18 Years	N/A
NCT04322682	129	76	https://clinicaltrials.gov/show/NCT04322682	Inclusion	1		Colchicine	Antiinflammatory	North America	Canada	6000	Adults	All	3	Single blind	1	0	1	1	Diagnosed/suspected COVID	Recruiting	23/03/2020	ClinicalTrials.gov	Colchicine Coronavirus SARS-CoV2 Trial (COLCORONA)	Colchicine Coronavirus SARS-CoV2 Trial (	Confirmed	Drug: Colchicine;Drug: Placebo oral tablet	; ; ;	AI	Colchicine	Mortality or hospitalization (30 days)	;;jean-claude.tardif@icm-mhi.org;chantal.lacoste@icm-mhi.org	;;514-376-3330;514 376-3330	Montreal Heart Institute;Montreal Health Innovations Coordinating Center;	Allocation: Randomized. Intervention model: Parallel Assignment. Primary purpose: Treatment. Masking: Single (Participant).	Corona Virus Infection	Interventional	6 April 2020	Inclusion	Antiinflammatory	Colchicine			Montreal Heart Institute	20200323	4/7/2020 10:40:56 AM	No	40 Years	N/A
NCT04323345	131	77	https://clinicaltrials.gov/show/NCT04323345	Inclusion	1		TCM	UCM	Asia	Egypt	1000	Both	All	3	Single blind		1	1	1	Diagnosed/suspected COVID	Recruiting	23/03/2020	ClinicalTrials.gov	Efficacy of Natural Honey Treatment in Patients With Novel Coronavirus	Efficacy of Natural Honey Treatment in P	Confirmed	Dietary Supplement: Natural Honey;Other: Standard Care	;	TCM	TCM	Rate of recovery from positive to negative swaps AND normalization of fever AND Resolution of lung inflammation in CT or X ray	;drmtantaway@yahoo.com	;+201221865587	Misr University for Science and Technology	Allocation: Randomized. Intervention model: Parallel Assignment. Primary purpose: Treatment. Masking: Single (Investigator).	COVID-19	Interventional	6 April 2020	Inclusion	Unconventional medicine	Natural honey			Misr University for Science and Technology	20200323	4/7/2020 10:40:56 AM	No	5 Years	75 Years
NCT04321096	133	78	https://clinicaltrials.gov/show/NCT04321096	Inclusion	1		Camostat Mesilate	Antiinflammatory	Europe	Denmark	180	Adults	All	2	Quadruple blind		1	1	0	Hospitalised/Severe/ICU	Recruiting	23/03/2020	ClinicalTrials.gov	The Impact of Camostat Mesilate on COVID-19 Infection	The Impact of Camostat Mesilate on COVID	Hospitalised	Drug: Camostat Mesilate;Drug: Placebo oral tablet	;	AI	Camostat Mesilate	Time to Clinical Improvement	;olesoega@rm.dk	;+45 78452842	Head of Department;	Allocation: Randomized. Intervention model: Parallel Assignment. Primary purpose: Treatment. Masking: Quadruple (Participant, Care Provider, Investigator, Outcomes Assessor).	Corona Virus Infection	Interventional	6 April 2020	Inclusion	Antiinflammatory	Camostat Mesilate			University of Aarhus	20200323	4/7/2020 10:40:56 AM	Yes	18 Years	110 Years
NCT04321278	134	79	https://clinicaltrials.gov/show/NCT04321278	Inclusion	1		Chloroquine / Azithromycin	Antimalaria_antiviral/antibiotic	South America	Brazil	440	Adults	All	3	Open label		1	1	0	Hospitalised/Severe/ICU	Recruiting	23/03/2020	ClinicalTrials.gov	Safety and Efficacy of Hydroxychloroquine Associated With Azithromycin in SARS-CoV2 Virus (Coalition Covid-19 Brasil II)	Safety and Efficacy of Hydroxychloroquin	Severe	Drug: Hydroxychloroquine + azithromycin;Drug: Hydroxychloroquine	;	AM/AB	Chloroquine/azithromycin	Evaluation of the clinical status	;aro.clinicaltrials@einstein.br	;+55 (11) 2151-1233	Hospital Israelita Albert Einstein;	Allocation: Randomized. Intervention model: Parallel Assignment. Primary purpose: Treatment. Masking: None (Open Label).	Coronavirus Infections;Pneumonia, Viral	Interventional	6 April 2020	Inclusion	Antibiotic	Azithromycin			Hospital Israelita Albert Einstein	20200323	4/7/2020 10:40:56 AM	No	18 Years	N/A
NCT04328441	135	80	https://clinicaltrials.gov/show/NCT04328441	Inclusion	1		BCG Vaccine	Vaccine	Europe	Netherlands	1500	Adults	All	3	Quadruple blind		1	1	0	Prevention	Recruiting	27/03/2020	ClinicalTrials.gov	Reducing Health Care Workers Absenteeism in Covid-19 Pandemic Through BCG Vaccine	Reducing Health Care Workers Absenteeism	Prevention	Drug: BCG Vaccine;Drug: Placebo		Vaccine	BCG vaccine	Health Care Workers absenteeism	t.tendoesschate@umcutrecht.nl	31621197660		Allocation: Randomized. Intervention model: Parallel Assignment. Primary purpose: Prevention. Masking: Quadruple (Participant, Care Provider, Investigator, Outcomes Assessor).	COVID-19	Interventional	6 April 2020	Exclusion	Vaccination				UMC Utrecht	20200327	4/7/2020 10:40:56 AM	No	18 Years	N/A
NCT04325061	137	81	https://clinicaltrials.gov/show/NCT04325061	Inclusion	1		Glucocorticoid	Glucocorticoid	Europe	Spain	200	Adults	All	4	Open label	1	0	1	1	Hospitalised/Severe/ICU	Recruiting	25/03/2020	ClinicalTrials.gov	Efficacy of Glucocorticoide Treatment for Patients With ARDS Caused by COVID-19	Efficacy of Glucocorticoide Treatment fo	Severe	Drug: Glucocorticoide	;	AI	Glucocorticoide	60 day mortality	;jesus.villar54@gmail.com	;+34606860027	Hospital Universitario Dr. Negrin;	Allocation: Randomized. Intervention model: Parallel Assignment. Primary purpose: Treatment. Masking: None (Open Label).	Acute Respiratory Distress Syndrome Caused by COVID-19	Interventional	6 April 2020	Inclusion	Antiinflammatory	Glucocorticoide			Dr. Negrin University Hospital	20200325	4/7/2020 10:40:56 AM	No	18 Years	N/A
NCT04325893	138	82	https://clinicaltrials.gov/show/NCT04325893	Inclusion	1		Chloroquine	Antimalaria	Europe	France	1300	Adults	All	3	Double blind	1	0	1	1	Mild/moderate	Recruiting	25/03/2020	ClinicalTrials.gov	Hydroxychloroquine Versus Placebo in Patients Presenting COVID-19 Infection and at Risk of Secondary Complication: a Prospective, Multicentre, Randomised, Double-blind Study	Hydroxychloroquine Versus Placebo in Pat	Moderate	Drug: Hydroxychloroquine;Drug: Placebo		AM	Chloroquine	14 day mortality or 14 day intubation	vincent.dubee@chu-angers.fr	241353872		Allocation: Randomized. Intervention model: Parallel Assignment. Primary purpose: Treatment. Masking: Double (Participant, Investigator).	Coronavirus	Interventional	6 April 2020	Inclusion	Anti Malaria	Hydroxychloroquine			University Hospital, Angers	20200325	4/7/2020 10:40:56 AM	No	18 Years	N/A
NCT04323800	140	83	https://clinicaltrials.gov/show/NCT04323800	Inclusion	1		Convalescent Plasma	Antibodies	North America	United States	150	Adults	All	2	Triple blind	1	0	1	0	Prevention	Recruiting	24/03/2020	ClinicalTrials.gov	Efficacy and Safety Human Coronavirus Immune Plasma (HCIP) vs. Control (SARS-CoV-2 Non-immune Plasma) Among Adults Exposed to COVID-19	Efficacy and Safety Human Coronavirus Im	Prevention	Biological: Anti- SARS-CoV-2 Plasma;Biological: SARS-CoV-2 non-immune Plasma	;	IT	Anti- SARS-CoV-2 Plasma	Cumulative incidence of composite outcome of disease severity (6 factors including mortality)	;TOID_CRC@jhmi.edu	;410-614-6702	Johns Hopkins University;	Allocation: Randomized. Intervention model: Parallel Assignment. Primary purpose: Treatment. Masking: Triple (Participant, Care Provider, Investigator).	Coronavirus;Convalescence	Interventional	6 April 2020	Inclusion	Immunotherapy	Anti- SARS-CoV-2 Plasma/SARS-CoV-2 non-immune Plasma			Sidney Kimmel Comprehensive Cancer Center at Johns Hopkins	20200324	4/7/2020 10:40:56 AM	No	18 Years	N/A
NCT04324021	141	84	https://clinicaltrials.gov/show/NCT04324021	Inclusion	1		Emapalumab/Anakinra	Other immunotherapeutics	Europe	Italy	54	Adults	All	3	Open label		1	1	1	Mild/moderate	Recruiting	25/03/2020	ClinicalTrials.gov	Efficacy and Safety of Emapalumab and Anakinra in Reducing Hyperinflammation and Respiratory Distress in Patients With COVID-19 Infection.	Efficacy and Safety of Emapalumab and An	Moderate	Biological: Emapalumab;Biological: Anakinra	;	IT	Emapalumab/Anakinra	Treatment success (not requiring invasive mechanical ventlilation or ECMO	;sobi.immuno@sobi.com	;+46 8 697 20 00	Direttore Dipartimento di Malattie Infettive;	Allocation: Randomized. Intervention model: Parallel Assignment. Primary purpose: Treatment. Masking: None (Open Label).	SARS-CoV-2	Interventional	6 April 2020	Inclusion	Immunotherapy	Emapalumab/Anakinra			Swedish Orphan Biovitrum	20200325	4/7/2020 10:40:56 AM	No	30 Years	79 Years
NCT04322396	143	85	https://clinicaltrials.gov/show/NCT04322396	Inclusion	1		Chloroquine / Azithromycin	Antimalaria_antiviral/antibiotic	Europe	Denmark	226	N/A	All	4	Quadruple blind	1	0	1	1	Hospitalised/Severe/ICU	Recruiting	23/03/2020	ClinicalTrials.gov	Proactive Prophylaxis With Azithromycin and Chloroquine in Hospitalized Patients With COVID-19	Proactive Prophylaxis With Azithromycin	Hospitalised	Drug: Azithromycin;Drug: Hydroxychloroquine;Drug: Placebo oral tablet;Drug: Placebo oral tablet		AM/AB	Chloroquine/Azithromycin	Number of days alive and discharged from hospital within 14 days	jens.ulrik.jensen@regionh.dk	4528938168		Allocation: Randomized. Intervention model: Parallel Assignment. Primary purpose: Treatment. Masking: Quadruple (Participant, Care Provider, Investigator, Outcomes Assessor).	Virus Diseases;Infection Viral	Interventional	6 April 2020	Inclusion	Anti Malaria/Antibiotic	Azithromycin/Hydroxychloroquine			Chronic Obstructive Pulmonary Disease Trial Network, Denmark	20200323	4/7/2020 10:40:56 AM	No	N/A	N/A
NCT04323228	144	86	https://clinicaltrials.gov/show/NCT04323228	Inclusion	1		oral nutrition supplement (ONS) enriched in eicosapentaenoic acid, gamma-linolenic acid and antioxidants	Dietary supplements	Asia	Saudi Arabia	30	Adults	All	4	Double blind		0		0	Diagnosed/suspected COVID	Not recruiting	23/03/2020	ClinicalTrials.gov	Anti-inflammatory/Antioxidant Oral Nutrition Supplementation in COVID-19	Anti-inflammatory/Antioxidant Oral Nutri	Confirmed	Dietary Supplement: oral nutrition supplement (ONS) enriched in eicosapentaenoic acid, gamma-linolenic acid and antioxidants;Dietary Supplement: isocaloric/isonutrigenous ONS		Dietary supplements	oral nutrition supplement (ONS) enriched in eicosapentaenoic acid, gamma-linolenic acid and antioxidants	Change from baseline serum (ferritin, IL-6, CRP, TNF-alpha, MCP-1) AND changes from baseline score of Nutrition risk screening-2002	mabulmeaty@ksu.edu.sa	966548155983		Allocation: Randomized. Intervention model: Parallel Assignment. Primary purpose: Supportive Care. Masking: Double (Participant, Care Provider).	COVID-19	Interventional	6 April 2020	Inclusion	Unconventional medicine	eicosapentaenoic acid+gamma-linolenic acid+antioxidants oral supplement			King Saud University	20200323	4/7/2020 10:40:56 AM	No	18 Years	65 Years
NCT04330144	145	87	https://clinicaltrials.gov/show/NCT04330144	Inclusion	1		Chloroquine	Antimalaria	Asia	South Korea	2486	Adults	All	3	Single blind		0		0	Prevention	Not recruiting	30/03/2020	ClinicalTrials.gov	Hydroxychloroquine as Post Exposure Prophylaxis for SARS-CoV-2(HOPE Trial)	Hydroxychloroquine as Post Exposure Prop	Prevention	Drug: Hydroxychloroquine as post exposure prophylaxis;Other: Others(No intervention)	;	AM	Chloroquine	Incidence rate of COVID-19, PCR-test	;imfell@yuhs.ac	;82-2-2019-3310	Gangnam Severance Hospital;	Allocation: Randomized. Intervention model: Parallel Assignment. Primary purpose: Prevention. Masking: Single (Outcomes Assessor).	Contact Person From COVID-19 Confirmed Patient	Interventional	6 April 2020	Exclusion	Prevention				Gangnam Severance Hospital	20200330	4/7/2020 10:40:56 AM	No	18 Years	99 Years
NCT04330495	146	88	https://clinicaltrials.gov/show/NCT04330495	Inclusion	1		Chloroquine	Antimalaria	Europe	Spain	800	Adults	All	4	Double blind	1	0	1	0	Prevention	Not recruiting	31/03/2020	ClinicalTrials.gov	Randomized, Controlled, Double-blind Clinical Trial Comparing the Efficacy and Safety of Chemoprophylaxis With Hydroxychloroquine in Patients Under Biological Treatment and / or JAK Inhibitors in the Prevention of SARS-CoV-2 Infection	Randomized, Controlled, Double-blind Cli	Prevention	Drug: Experimental group;Drug: Control group		AM	Chloroquine	Incidence rate of COVID-19 AND prevalence of COVID-19 AND mortality rate secondary to COVID-19 AND admission rate to ICU secondary to COVID-19	javiercrespo1991@gmail.com	942202520		Allocation: Randomized. Intervention model: Parallel Assignment. Primary purpose: Prevention. Masking: Double (Participant, Investigator).	COVID 19;Immunomediated Inflammatory Disease in Treatment With Biological Agents and / or Jak Inhibitors	Interventional	6 April 2020	Exclusion	Prevention				Instituto de Investigación Marqués de Valdecilla	20200331	4/7/2020 10:40:56 AM	No	18 Years	75 Years
NCT04326920	148	89	https://clinicaltrials.gov/show/NCT04326920	Inclusion	1		Sargramostim	Other immunotherapeutics	Europe	International	80	Adults	All	4	Open label		1	1	0	Mild/moderate	Recruiting	24/03/2020	ClinicalTrials.gov	Sargramostim in Patients With Acute Hypoxic Respiratory Failure Due to COVID-19 (SARPAC)	Sargramostim in Patients With Acute Hypo	Moderate	Drug: Sargramostim;Other: Control	;	IT	Sargramostim	Improvement in oxygenation	;anja.delporte@uzgent.be	;+32-9-3320228	University Hospital, Ghent;	Allocation: Randomized. Intervention model: Parallel Assignment. Primary purpose: Treatment. Masking: None (Open Label).	COVID-19	Interventional	6 April 2020	Inclusion	Immunotherapy	Sargramostim			University Hospital, Ghent	20200324	4/7/2020 10:40:56 AM	No	18 Years	80 Years
NCT04328285	149	90	https://clinicaltrials.gov/show/NCT04328285	Inclusion	1		Chloroquine + other	Antimalaria_antiviral/antibiotic	Europe	France	1200	Adults	All	3	Triple blind		0		0	Prevention	Not Recruiting	25/03/2020	ClinicalTrials.gov	Chemoprophylaxis of SARS-CoV-2 Infection (COVID-19) in Exposed Healthcare Workers	Chemoprophylaxis of SARS-CoV-2 Infection	Prevention	Drug: Hydroxychloroquine;Drug: Placebo of Hydroxychloroquine;Drug: Lopinavir and ritonavir;Drug: Placebo of LPV/r Tablets	; ;	AM/AV	Chloroquine/Lopinavir	Occurrence of an symptomatic or asymptomatic SARS-CoV-2 infection	;;Arnauld.Garcin@chu-st-etienne.fr	;;33 4 77 12 02 85	CHU de Saint-Etienne;Institut Pasteur;	Allocation: Randomized. Intervention model: Parallel Assignment. Primary purpose: Prevention. Masking: Triple (Participant, Investigator, Outcomes Assessor).	COVID-19	Interventional	6 April 2020	Exclusion	Prevention				Centre Hospitalier Universitaire de Saint Etienne	20200325	4/7/2020 10:40:56 AM	No	18 Years	N/A
NCT04324463	150	91	https://clinicaltrials.gov/show/NCT04324463	Inclusion	1		Chloroquine / Azithromycin	Antimalaria_antiviral/antibiotic	North America	Canada	1500	Adults	All	3	Open label	1	0	1	0	Prevention	Recruiting	25/03/2020	ClinicalTrials.gov	Anti-Coronavirus Therapies to Prevent Progression of Coronavirus Disease 2019 (COVID-19) Trial	Anti-Coronavirus Therapies to Prevent Pr	Prevention	Drug: Azithromycin;Drug: Chloroquine	; ; ;	AM/AB	Chloroquine/azithromycin	Mortality 6 week or 6 week admission for outpatients	;;ACT.ProjectTeam@PHRI.ca;ACT.ProjectTeam@PHRI.ca	;;905-297-3479;	Population Health Research Institute;Population Health Research Institute;	Allocation: Randomized. Intervention model: Parallel Assignment. Primary purpose: Treatment. Masking: None (Open Label).	Coronavirus;Severe Acute Respiratory Syndrome	Interventional	6 April 2020	Inclusion	Anti Malaria/Antibiotic	Azithromycin/Chloroquine			Population Health Research Institute	20200325	4/7/2020 10:40:56 AM	No	18 Years	N/A
NCT04326426	151	92	https://clinicaltrials.gov/show/NCT04326426	Inclusion	1		Tradipitant	Other immunotherapeutics	N/A	N/A	300	Adults	All	3	Triple blind		0		0	Hospitalised/Severe/ICU	Recruiting	26/03/2020	ClinicalTrials.gov	COVIDL1: A Study to Investigate the Efficacy of Tradipitant in Treating Severe or Critical COVID-19 Infection	COVIDL1: A Study to Investigate the Effi	Severe	Drug: Tradipitant;Drug: Placebo		IT	Tradipitant	Normalization of fever and oxygen saturation	vasilios.polymeropoulos@vandapharma.com	2027343400		Allocation: Randomized. Intervention model: Parallel Assignment. Primary purpose: Treatment. Masking: Triple (Participant, Care Provider, Investigator).	Coronavirus Infection	Interventional	6 April 2020	Inclusion	Unconventional medicine	Tradipitant			Vanda Pharmaceuticals	20200326	4/7/2020 10:40:56 AM	No	18 Years	90 Years
NCT04324996	152	93	https://clinicaltrials.gov/show/NCT04324996	Inclusion	1		NK cells	Other immunotherapeutics	Asia	China	90	Adults	All	2	Quadruple blind		0		1	Diagnosed/suspected COVID	Recruiting	25/03/2020	ClinicalTrials.gov	A Phase I/II Study of Universal Off-the-shelf NKG2D-ACE2 CAR-NK Cells for Therapy of COVID-19	A Phase I/II Study of Universal Off-the-	Confirmed	Biological: NK cells,IL15-NK cells,NKG2D CAR-NK cells,ACE2 CAR-NK cells,NKG2D-ACE2 CAR-NK cells	; ;	IT	NK cells	Clinical response AND Side effects in the treatment group	;gwzxliumin@foxmail.com;gwzxliumin@foxmail.com	;13668072999;13668072999	Chongqing Public Health Center;	Allocation: Randomized. Intervention model: Parallel Assignment. Primary purpose: Treatment. Masking: Quadruple (Participant, Care Provider, Investigator, Outcomes Assessor).	COVID-19	Interventional	6 April 2020	Inclusion	Immunotherapy	NKG2D-ACE2 CAR-NK Cells			Chongqing Public Health Medical Center	20200325	4/7/2020 10:40:56 AM	No	18 Years	N/A
NCT04325633	153	94	https://clinicaltrials.gov/show/NCT04325633	Inclusion	1		Naproxen	Antiinflammatory	Europe	France	584	Adults	All	3	Open label	1	0	1	0	Hospitalised/Severe/ICU	Not recruiting	26/03/2020	ClinicalTrials.gov	Efficacy of Addition of Naproxen in the Treatment of Critically Ill Patients Hospitalized for COVID-19 Infection	Efficacy of Addition of Naproxen in the	Hospitalised	Drug: 1: Naproxen;Drug: 2: Standard of care	;	AI	Naproxen	Mortalit 30 day	;frederic.adnet@aphp.fr	;+33 1-48-96-44-08	Assistance Publique - Hôpitaux de Paris;	Allocation: Randomized. Intervention model: Parallel Assignment. Primary purpose: Treatment. Masking: None (Open Label).	COVID-19	Interventional	6 April 2020	Inclusion	Antiinflammatory	Naproxen			Assistance Publique - Hôpitaux de Paris	20200326	4/7/2020 10:40:56 AM	No	18 Years	N/A
NCT04330586	154	95	https://clinicaltrials.gov/show/NCT04330586	Inclusion	1		Chloroquine + other	Other drug combinations	Asia	South Korea	141	Adults	All	2	Open label		1	1	1	Mild/moderate	Not recruiting	31/03/2020	ClinicalTrials.gov	A Trial of Ciclesonide in Adults With Mild COVID-19	A Trial of Ciclesonide in Adults With Mi	Mild	Drug: Ciclesonide Metered Dose Inhaler [Alvesco];Drug: Hydroxychloroquine		AI/AM	Ciclesonide/Hydroxychloroquine	Rate of SARS-CoV-2 eradication (viral load)	infection@korea.ac.kr	82-2-2626-3052		Allocation: Randomized. Intervention model: Parallel Assignment. Primary purpose: Treatment. Masking: None (Open Label).	COVID-19	Interventional	6 April 2020	Inclusion	Anti malaria/Adjunct therapy	Ciclesonide Metered Dose Inhaler/Hydroxychloroquine			Korea University Guro Hospital	20200331	4/7/2020 10:40:56 AM	No	18 Years	80 Years
NCT04331054	155	96	https://clinicaltrials.gov/show/NCT04331054	Inclusion	1		Budesonide / Formoterol	Glucocorticoid	Europe	France	436	Adults	All	3	Open label	1	0	1	0	Diagnosed/suspected COVID	Recruiting	29/03/2020	ClinicalTrials.gov	Protective Role of Inhaled Steroids for Covid-19 Infection	Protective Role of Inhaled Steroids for	Confirmed	Drug: 2: Usual practice + SYMBICORT RAPIHALER;Other: 1: Usual practice	; ;	AI	SYMBICORT RAPIHALER	Time to Clinical Improvement (including death)	;camille.taille@aphp.fr;camille.taille@aphp.fr	;+33 1 40 25 68 63;+33 1 40 25 68 63	Assistance Publique - Hôpitaux de Paris;	Allocation: Randomized. Intervention model: Parallel Assignment. Primary purpose: Treatment. Masking: None (Open Label).	Covid-19 Infection;Hospitalization in Respiratory Disease Department	Interventional	6 April 2020	Inclusion	Antiinflammatory	budesonide+eformoterol			Assistance Publique - Hôpitaux de Paris	20200329	4/7/2020 10:40:56 AM	No	18 Years	75 Years
NCT04331470	156	97	https://clinicaltrials.gov/show/NCT04331470	Inclusion	1		Levamisole/Budesonide/Formoterol	Antiinflammatory	Asia	Iran	30	Both	All	3	Double blind		0		0	Diagnosed/suspected COVID	Recruiting	30/03/2020	ClinicalTrials.gov	Evaluation of Efficacy of Levamisole and Formoterol+Budesonide in Treatment of COVID-19	Evaluation of Efficacy of Levamisole and	Confirmed	Drug: Levamisole Pill + Budesonide+Formoterol inhaler;Drug: Lopinavir/Ritonavir + hydoxychloroquine	;	AI	Levamisole/Budesonide/Formoterol	Clear chest CT-scan AND PCR test	;Dr.afazeli@gmail.com	;+989121392982	Fasa University of Medical Sciences;	Allocation: Randomized. Intervention model: Parallel Assignment. Primary purpose: Treatment. Masking: Double (Participant, Outcomes Assessor).	COVID-19	Interventional	6 April 2020	Inclusion	Immunotherapy/Adjunct therapy/Anti malaria	Levamisole Pill+Budesonide and Formoterol inhaler/Lopinavir+Ritonavir+hydoxychloroquine			Fasa University of Medical Sciences	20200330	4/7/2020 10:40:56 AM	No	15 Years	100 Years
NCT04328961	157	98	https://clinicaltrials.gov/show/NCT04328961	Inclusion	1		Chloroquine	Antimalaria	North America	United States	2000	Adults	All	1	Single blind		0		1	Prevention	Recruiting	23/03/2020	ClinicalTrials.gov	Hydroxychloroquine for COVID-19 PEP	Hydroxychloroquine for COVID-19 PEP	Prevention	Drug: Hydroxychloroquine Sulfate;Drug: Ascorbic Acid	; ;	AM	Chloroquine	Occurence of COVID-19, PCR-test	;;meigs@uw.edu	;;206-520-3833	University of Washington;NYU Langone Health;	Allocation: Randomized. Intervention model: Parallel Assignment. Primary purpose: Prevention. Masking: Single (Participant).	COVID-19;Corona Virus Infection;SARS (Severe Acute Respiratory Syndrome)	Interventional	6 April 2020	Exclusion	Anti malaria/Unconventional medicine	Hydroxychloroquine/Vitamin C			University of Washington	20200323	4/7/2020 10:40:56 AM	No	18 Years	80 Years
NCT04329650	159	99	https://clinicaltrials.gov/show/NCT04329650	Inclusion	1		Siltuximab/Glucocorticoid	Other drug combinations	Europe	Spain	100	Adults	All	2	Open label		1	1	0	Hospitalised/Severe/ICU	Recruiting	31/03/2020	ClinicalTrials.gov	Efficacy and Safety of Siltuximab vs. Corticosteroids in Hospitalized Patients With COVID19 Pneumonia	Efficacy and Safety of Siltuximab vs. Co	Hospitalised	Drug: Siltuximab;Drug: Methylprednisolone	; ;	IT/AI	Siltuximab/Methylprednisolone	Proportion of patients requiring ICU admission	;fgarcia@clinic.cat;	;+34932275400;	Hospital Clínic de Barcelona;	Allocation: Randomized. Intervention model: Parallel Assignment. Primary purpose: Treatment. Masking: None (Open Label).	COVID-19	Interventional	6 April 2020	Inclusion	Immunotherapy/Antiinflammatory	Siltuximab/Methylprednisolone			Judit Pich Martínez	20200331	4/7/2020 10:40:56 AM	No	18 Years	N/A
NCT04326075	162	100	https://clinicaltrials.gov/show/NCT04326075	Inclusion	1		CPAP	Respiratory adjuncts (ventilator / gas)	Europe	Italy	900	Adults	All	N/A	Open label	1	0	1	0	Mild/moderate	Recruiting	26/03/2020	ClinicalTrials.gov	Early CPAP in COVID Patients With Respiratory Failure.	Early CPAP in COVID Patients With Respir	Moderate	Device: CPAP treatment	;	AT	CPAP treatment	Mortality 7 day or intubation 7 day	;guido.bertolini@marionegri.it	;+39 035 4554 313	Istituto di Ricerche Farmacologiche Mario Negri IRCCS;	Allocation: Randomized. Intervention model: Parallel Assignment. Primary purpose: Treatment. Masking: None (Open Label).	CPAP Ventilation;COVID-19;Emergency Departments	Interventional	6 April 2020	Inclusion	Adjunct therapy	CPAP			Mario Negri Institute for Pharmacological Research	20200326	4/7/2020 10:40:56 AM	No	18 Years	70 Years
NCT04327505	163	101	https://clinicaltrials.gov/show/NCT04327505	Inclusion	1		Hyperbaric oxygen	Respiratory adjuncts (ventilator / gas)	Intercontinental	International	200	Adults	All	3	Open label		1	1	1	Mild/moderate	Recruiting	25/03/2020	ClinicalTrials.gov	Safety and Efficacy of Hyperbaric Oxygen for ARDS in Patients With COVID-19	Safety and Efficacy of Hyperbaric Oxygen	Moderate	Drug: Hyperbaric oxygen	;	AT	Hyperbaric oxygen	PO2/FiO2 (Safety) AND PO2/FiO2 (Efficacy) AND EWS (Safety) AND EWS (Efficacy) AND mmunological response (Efficacy) AND Mechanical ventilation (Efficacy	;anders.kjellberg@ki.se	;+46812375212	Karolinska University Hospital (and karolinska Insitutet);	Allocation: Randomized. Intervention model: Parallel Assignment. Primary purpose: Treatment. Masking: None (Open Label).	Acute Lung Injury/Acute Respiratory Distress Syndrome (ARDS);Cytokine Storm;Infection Viral	Interventional	6 April 2020	Inclusion	Adjunct therapy	Hyperbaric oxygen			Karolinska University Hospital	20200325	4/7/2020 10:40:56 AM	No	18 Years	90 Years
NCT04329923	165	102	https://clinicaltrials.gov/show/NCT04329923	Inclusion	1		Chloroquine	Antimalaria	North America	United States	400	Adults	All	2	Triple blind		0		0	Prevention	Recruiting	30/03/2020	ClinicalTrials.gov	The PATCH Trial (Prevention And Treatment of COVID-19 With Hydroxychloroquine)	The PATCH Trial (Prevention And Treatmen	Prevention	Drug: Hydroxychloroquine Sulfate 400 mg twice a day;Drug: Hydroxychloroquine Sulfate 600 mg twice a day;Drug: Hydroxychloroquine Sulfate 600 mg once a day;Drug: Placebo oral tablet	; ;	AM	Chloroquine	Release from quarantine time AND Rate of hospital discharge AND rate of infection	;ravi.amaravadi@pennmedicine.upenn.edu;ravi.amaravadi@pennmedicine.upenn.edu	;2157965159;215-796-5159	University of Pennsylvania;	Allocation: Randomized. Intervention model: Parallel Assignment. Primary purpose: Treatment. Masking: Triple (Participant, Care Provider, Investigator).	COVID-19	Interventional	6 April 2020	Inclusion	Anti malaria	Hydroxychloroquine			Ravi Amaravadi, MD	20200330	4/7/2020 10:40:56 AM	No	18 Years	N/A
NCT04333420	167	103	https://clinicaltrials.gov/show/NCT04333420	Inclusion	1		FX-1	Other immunotherapeutics	Europe	Netherlands	130	Adults	All	3	Open label		0		1	Hospitalised/Severe/ICU	Recruiting	01/04/2020	ClinicalTrials.gov	OPEN LABEL, RANDOMIZED PHASE II/III STUDY OF IFX-1 IN PATIENTS WITH SEVERE COVID-19 PNEUMONIA	OPEN LABEL, RANDOMIZED PHASE II/III STUD	Severe	Drug: Best supportive Care (BSC) + IFX-1;Drug: Best supportive care only	; ;	IT	FX-1	Change in PaO2/FiO2	;korinna.pilz@inflarx.de;	;+49 89 4141 89 78;	University Amsterdam;	Allocation: Randomized. Intervention model: Parallel Assignment. Primary purpose: Treatment. Masking: None (Open Label).	COVID-19 Pneumonia	Interventional	6 April 2020	Inclusion	Immunotherapy	IFX-1			InflaRx GmbH	20200401	4/7/2020 10:40:56 AM	No	18 Years	N/A
NCT04333628	168	104	https://clinicaltrials.gov/show/NCT04333628	Inclusion	1		Chloroquine	Antimalaria	Asia	Israel	210	Adults	All	3	Open label		0		1	Diagnosed/suspected COVID	Not recruiting	01/04/2020	ClinicalTrials.gov	Chloroquine for Mild Symptomatic and Asymptomatic COVID-19	Chloroquine for Mild Symptomatic and Asy	Confirmed	Drug: chloroquine;Other: standard care		AM	Chloroquine	Change in virus duration AND Change in the number of patients going from asymptomatic to moderately disease	goldstein_le@clalit.org.il	972-4-6494143		Allocation: Randomized. Intervention model: Parallel Assignment. Primary purpose: Treatment. Masking: None (Open Label).	COVID-19;Plaquenil	Interventional	6 April 2020	Inclusion	Anti malaria	chloroquine			HaEmek Medical Center, Israel	20200401	4/7/2020 10:40:56 AM	No	18 Years	N/A
NCT04329832	169	105	https://clinicaltrials.gov/show/NCT04329832	Inclusion	1		Chloroquine / Azithromycin	Antimalaria_antiviral/antibiotic	North America	United States	300	Adults	All	2	Open label	1	0	1	1	Hospitalised/Severe/ICU	Recruiting	30/03/2020	ClinicalTrials.gov	Hydroxychloroquine vs. Azithromycin for Hospitalized Patients With Suspected or Confirmed COVID-19	Hydroxychloroquine vs. Azithromycin for	Hospitalised	Drug: Hydroxychloroquine;Drug: Azithromycin	;	AM/AB	Chloroquine/Azithromycin	COVID Ordinal Outcomes Scale 14 day (including mortality)	;Valerie.Aston@imail.org	;8015074606	Intermountain Health Care, Inc.;	Allocation: Randomized. Intervention model: Parallel Assignment. Primary purpose: Treatment. Masking: None (Open Label).	COVID-19	Interventional	6 April 2020	Inclusion	Anti Malaria/Antibiotic	Hydroxychloroquine/Azithromycin			Intermountain Health Care, Inc.	20200330	4/7/2020 10:40:56 AM	No	18 Years	N/A
NCT04330300	170	106	https://clinicaltrials.gov/show/NCT04330300	Inclusion	1		Thiazide/Calcium Channel Blockers/ACE inhibitor/Angiotensin receptor blocker	Antihypertensiva	Europe	Ireland	2414	Adults	All	4	Open label		1	1	0	Prevention	Recruiting	30/03/2020	ClinicalTrials.gov	Coronavirus ACEi/ARB Investigation	Coronavirus ACEi/ARB Investigation	Prevention	Drug: Thiazide or Thiazide-like diuretics;Drug: Calcium Channel Blockers;Drug: ACE inhibitor;Drug: Angiotensin receptor blocker	; ;	AH	Thiazide/Calcium Channel Blockers/ACE inhibitor/Angiotensin receptor blocker	Moratlity, require intubation in ICU, NIV, 12 months	;johnwilliam.mcevoy@nuigalway.ie;johnwilliam.mcevoy@nuigalway.ie	;+353 9 154 4331;+353 9 154 4331	National University of Ireland, Galway, Ireland;	Allocation: Randomized. Intervention model: Parallel Assignment. Primary purpose: Prevention. Masking: None (Open Label).	Hypertension;COVID-19	Interventional	6 April 2020	Inclusion	Adjunct therapy	Thiazide/Calcium Channel Blockers/ACE inhibitor/Angiotensin receptor blocker			National University of Ireland, Galway, Ireland	20200330	4/7/2020 10:40:56 AM	No	60 Years	N/A
NCT04330690	171	107	https://clinicaltrials.gov/show/NCT04330690	Inclusion	1		Ritonavir/Lopinavir	Antiviral	North America	Canada	440	Both	All	2	Open label	1	0	1	1	Hospitalised/Severe/ICU	Recruiting	23/03/2020	ClinicalTrials.gov	Treatments for COVID-19: Canadian Arm of the SOLIDARITY Trial	Treatments for COVID-19: Canadian Arm of	Hospitalised	Drug: Lopinavir/ritonavir		AV	Ritonavir/Lopinavir	Efficacy of Intervention (including death)				Allocation: Randomized. Intervention model: Parallel Assignment. Primary purpose: Treatment. Masking: None (Open Label).	COVID-19	Interventional	6 April 2020	Inclusion	AV	Lopinavir+ritonavir			Sunnybrook Health Sciences Centre	20200323	4/7/2020 10:40:56 AM	No	6 Months	N/A
NCT04327388	172	108	https://clinicaltrials.gov/show/NCT04327388	Inclusion	1		Sarilumab	Anti-IL-6	Europe	France	400	Adults	All	3	Quadruple blind		1	1	0	Hospitalised/Severe/ICU	Recruiting	26/03/2020	ClinicalTrials.gov	Sarilumab COVID-19	Sarilumab COVID-19	Hospitalised	Drug: Sarilumab SAR153191;Drug: Placebo	;	IT	Sarilumab	Time to resolution of fever AND percetange of patients reporting severity rating scale	;Contact-US@sanofi.com	;800-633-1610	Sanofi;	Allocation: Randomized. Intervention model: Parallel Assignment. Primary purpose: Treatment. Masking: Quadruple (Participant, Care Provider, Investigator, Outcomes Assessor).	Corona Virus Infection	Interventional	6 April 2020	Inclusion	Immunotherapy	Sarilumab			Sanofi	20200326	4/7/2020 10:40:56 AM	No	18 Years	N/A
NCT04333654	173	109	https://clinicaltrials.gov/show/NCT04333654	Inclusion	1		Chloroquine	Antimalaria	North America	United States	210	Adults	All	1	Quadruple blind		0		0	Diagnosed/suspected COVID	Recruiting	01/04/2020	ClinicalTrials.gov	Hydroxychloroquine in Outpatient Adults With COVID-19	Hydroxychloroquine in Outpatient Adults	Confirmed	Drug: Hydroxychloroquine SAR321068;Drug: Placebo	;	AM	Chloroquine	Change in viral load, PCR AND number of participants by PCR results	;Contact-US@sanofi.com	;800-633-1610	Sanofi;	Allocation: Randomized. Intervention model: Parallel Assignment. Primary purpose: Treatment. Masking: Quadruple (Participant, Care Provider, Investigator, Outcomes Assessor).	Coronavirus Infection	Interventional	6 April 2020	Inclusion	Anti malaria	Hydroxychloroquine			Sanofi	20200401	4/7/2020 10:40:56 AM	No	18 Years	N/A
ISRCTN50189673	174	110	http://isrctn.com/ISRCTN50189673	Inclusion	1		Chloroquine + other	Other drug combinations	Europe	United Kingdom	5000	Adults	All	3	Not specified	1	0	1	0	Hospitalised/Severe/ICU	Recruiting	02/04/2020	ISRCTN	A randomised trial of treatments to prevent death in patients hospitalised with COVID-19 (coronavirus)	A randomised trial of treatments to prev	Hospitalised	<br> RECOVERY is a randomised trial among adults hospitalised for COVID-19. Eligible patients are randomly allocated between several treatment arms, each to be given in addition to the usual standard of care in the participating hospital: No additional treatment vs lopinavir + ritonavir vs interferon 1ß vs low-dose corticosteroids vs hydroxychloroquine. For patients for whom not all the trial arm…	Michelle	AV/IT/AM/AI	lopinavir/ritonavir/interferon β1a/hydroxychloroquine/corticosteroids	Mortality 28 day in-hospital	recoverytrial@ndph.ox.ac.uk	-		Randomised adaptive trial (Treatment)	Severe Acute Respiratory Syndrome, COVID-19 (SARS coronavirus 2 [SARS-CoV-2] infection) <br>Infections and Infestations	Interventional	6 April 2020	Inclusion	AV/Antiinflammatory/Anti malaria/Immunotherapy	lopinavir+ritonavir/interferon 1ß/low-dose corticosteroids/hydroxychloroquine			University of Oxford	20200402	4/7/2020 10:40:56 AM	No
NCT04331834	176	111	https://clinicaltrials.gov/show/NCT04331834	Inclusion	1		Chloroquine	Antimalaria	Europe	Spain	440	Adults	All	3	Quadruple blind		0		0	Prevention	Recruiting	01/04/2020	ClinicalTrials.gov	Pre-Exposure Prophylaxis With Hydroxychloroquine for High-Risk Healthcare Workers During the COVID-19 Pandemic	Pre-Exposure Prophylaxis With Hydroxychl	Prevention	Drug: Hydroxychloroquine;Drug: Placebos		AM	Chloroquine	Confimred COVID-19 cases, PCR-test or symptoms			Barcelona Institute for Global Health	Allocation: Randomized. Intervention model: Parallel Assignment. Primary purpose: Prevention. Masking: Quadruple (Participant, Care Provider, Investigator, Outcomes Assessor).	COVID-19	Interventional	6 April 2020	Exclusion	Prevention				Barcelona Institute for Global Health	20200401	4/7/2020 10:40:56 AM	No	18 Years	N/A
NCT04327401	178	112	https://clinicaltrials.gov/show/NCT04327401	Inclusion	1		Glucocorticoid	Glucocorticoid	South America	Brazil	290	Adults	All	3	Open label		1	1	0	Mild/moderate	Not recruiting	26/03/2020	ClinicalTrials.gov	COVID-19-associated ARDS Treated With Glucocorticoide: Alliance Covid-19 Brasil III	COVID-19-associated ARDS Treated With Gl	Moderate	Drug: Glucocorticoide	;	AI	Glucocorticoide	Ventilator-free days	;luciano.azevedo@hsl.org.br	;+5511992383611	Teaching Director of Teaching & Research Institute Sírio-Libanês Hospital;	Allocation: Randomized. Intervention model: Parallel Assignment. Primary purpose: Treatment. Masking: None (Open Label).	Coronavirus Infection;Pneumonia, Viral;Acute Respiratory Distress Syndrome	Interventional	6 April 2020	Inclusion	Antiinflammatory	Glucocorticoide			Luiz F. L. Reis, Ph.D.	20200326	4/7/2020 10:40:56 AM	No	18 Years	N/A
NCT04328012	179	113	https://clinicaltrials.gov/show/NCT04328012	Inclusion	1		Chloroquine + other	Other drug combinations	North America	United States	4000	Adults	All	3	Quadruple blind		1	1	1	Hospitalised/Severe/ICU	Recruiting	27/03/2020	ClinicalTrials.gov	Comparison Of Therapeutics for Hospitalized Patients Infected With SARS-CoV-2 In a Pragmatic aDaptive randoMizED Clinical Trial During the COVID-19 Pandemic (COVID MED Trial)	Comparison Of Therapeutics for Hospitali	Hospitalised	Drug: lopinavir/ritonavir;Drug: Hydroxychloroquine Sulfate;Drug: Losartan;Drug: Placebos	;	AV/AM/AH	lopinavir/ritonavir/Hydroxychloroquine Sulfate/Losartan	NCOSS scores differences	;jennifer.victory@bassett.org	;6075476965	Bassett Medical Center;	Allocation: Randomized. Intervention model: Parallel Assignment. Primary purpose: Treatment. Masking: Quadruple (Participant, Care Provider, Investigator, Outcomes Assessor).	SARS-CoV-2 Infection	Interventional	6 April 2020	Inclusion	AV/Anti malaria/Adjunct therapy	lopinavir+ritonavir/Hydroxychloroquine/Losartan			Bassett Healthcare	20200327	4/7/2020 10:40:56 AM	No	18 Years	N/A
NCT04328272	180	114	https://clinicaltrials.gov/show/NCT04328272	Inclusion	1		Chloroquine / Azithromycin	Antimalaria_antiviral/antibiotic	Asia	Pakistan	75	Adults	All	3	Single blind		0		0	Diagnosed/suspected COVID	Not recruiting	25/03/2020	ClinicalTrials.gov	Effectiveness of Hydroxychloroquine in Covid-19 Patients	Effectiveness of Hydroxychloroquine in C	Confirmed	Drug: Hydroxychloroquine 200 Mg Oral Tablet;Drug: Azithromycin 500Mg Oral Tablet;Dietary Supplement: Glucose tablets	; ;	AM/AB	Hydroxychloroquine/Azithromycin	EWS = 0	;dean@ayubmed.edu.pk;dean@ayubmed.edu.pk	;00923219111681;00929929311100	Khyber Medical University Peshawer;	Allocation: Randomized. Intervention model: Parallel Assignment. Primary purpose: Treatment. Masking: Single (Participant).	COVID19	Interventional	6 April 2020	Inclusion	Anti Malaria/Antibiotic/Unconventional medicine	Hydroxychloroquine/Azithromycin/Glucose tablets			Prof. Dr. Umar Farooq	20200325	4/7/2020 10:40:56 AM	No	18 Years	50 Years
NCT04331600	182	115	https://clinicaltrials.gov/show/NCT04331600	Inclusion	1		Chloroquine	Antimalaria	Europe	Poland	400	Adults	All	4	Open label	1	0	1	1	Hospitalised/Severe/ICU	Recruiting	30/03/2020	ClinicalTrials.gov	ChloroQUine As antiviRal treAtmeNT In coroNavirus infEction 2020	ChloroQUine As antiviRal treAtmeNT In co	Hospitalised	Drug: Chloroquine phosphate;Other: Telemedicine		AM	Chloroquine	Mortality 15 day or hospitalization 15 day	marta.duda-sikula@umed.wroc.pl	48 71 784 00 34		Allocation: Randomized. Intervention model: Parallel Assignment. Primary purpose: Treatment. Masking: None (Open Label).	COVID-19	Interventional	6 April 2020	Inclusion	Anti malaria	Chloroquine			Wroclaw Medical University	20200330	4/7/2020 10:40:56 AM	No	18 Years	N/A
NCT04332094	184	116	https://clinicaltrials.gov/show/NCT04332094	Inclusion	1		Chloroquine + other	Other drug combinations	Europe	Spain	276	Adults	All	2	Open label	1	0	1	1	Hospitalised/Severe/ICU	Recruiting	31/03/2020	ClinicalTrials.gov	Clinical Trial of Combined Use of Hydroxychloroquine, Azithromycin, and Tocilizumab for the Treatment of COVID-19	Clinical Trial of Combined Use of Hydrox	Hospitalised	Drug: Tocilizumab;Drug: Hydroxychloroquine;Drug: Azithromycin		IT/AM/AB	Tocilizumab/Hydroxychloroquine/Azithromycin	Mortality 2 week in-hospital	pdomingo@santpau.cat			Allocation: Randomized. Intervention model: Parallel Assignment. Primary purpose: Treatment. Masking: None (Open Label).	COVID	Interventional	6 April 2020	Inclusion	Anti malaria/Immunotherapy/Antibiotic	Tocilizumab/Hydroxychloroquine/Azithromycin			Fundació Institut de Recerca de l'Hospital de la Santa Creu i Sant Pau	20200331	4/7/2020 10:40:56 AM	No	18 Years	N/A
NCT04333589	186	117	https://clinicaltrials.gov/show/NCT04333589	Inclusion	1		Favipiravir	Antiviral	Asia	China	210	Adults	All	N/A	Open label		0		0	Diagnosed/suspected COVID	Recruiting	01/04/2020	ClinicalTrials.gov	A Prospective Study on Corona Virus Disease 2019 Patients Whose Nucleic Acids Changed From Negative to Positive	A Prospective Study on Corona Virus Dise	Confirmed	Drug: Favipiravir	;	AV	Favipiravir	Viral nucleic acid test negative conversion rate	;john131212@sina.com	;13911405123	Peking University First Hospital;	Allocation: Randomized. Intervention model: Parallel Assignment. Primary purpose: Treatment. Masking: None (Open Label).	COVID-19	Interventional	6 April 2020	Inclusion	AV	Favipiravir			Peking University First Hospital	20200401	4/7/2020 10:40:56 AM	No	18 Years	80 Years
NCT04328467	187	118	https://clinicaltrials.gov/show/NCT04328467	Inclusion	1		Chloroquine	Antimalaria	North America	United States	3500	Adults	All	3	Quadruple blind	1	0	1	1	Prevention	Not recruiting	27/03/2020	ClinicalTrials.gov	Pre-exposure Prophylaxis for SARS-Coronavirus-2	Pre-exposure Prophylaxis for SARS-Corona	Prevention	Drug: Hydroxychloroquine;Other: Placebo	; ;	AM	Chloroquine	Mortality 12 week (COVID-19-free survival)	;covid19prep@umn.edu;covid19prep@umn.edu	;612-626-8171;	University of Minnesota;	Allocation: Randomized. Intervention model: Parallel Assignment. Primary purpose: Treatment. Masking: Quadruple (Participant, Care Provider, Investigator, Outcomes Assessor).	COVID-19;Corona Virus Infection;ARDS;Acute Respiratory Distress Syndrome	Interventional	6 April 2020	Exclusion	Prevention				University of Minnesota	20200327	4/7/2020 10:40:56 AM	No	18 Years	N/A
NCT04328480	188	119	https://clinicaltrials.gov/show/NCT04328480	Inclusion	1		Colchicine	Antiinflammatory	Intercontinental	International	2500	Adults	All	3	Open label	1	0	1	1	Hospitalised/Severe/ICU	Recruiting	30/03/2020	ClinicalTrials.gov	The ECLA PHRI COLCOVID Trial	The ECLA PHRI COLCOVID Trial	Hospitalised	Drug: Colchicine;Other: Local standard of care		AI	Colchicine	Mortality 30 day	aorlandinimd@eclainternational.org	+ 54 341 4450210		Allocation: Randomized. Intervention model: Parallel Assignment. Primary purpose: Treatment. Masking: None (Open Label).	COVID-19	Interventional	6 April 2020	Inclusion	Immunotherapy	Colchicine			Estudios Clínicos Latino América	20200330	4/7/2020 10:40:56 AM	No	18 Years	N/A
NCT04328493	189	120	https://clinicaltrials.gov/show/NCT04328493	Inclusion	1		Chloroquine	Antimalaria	Asia	Vietnam	250	Adults	All	2	Open label		1	1	1	Diagnosed/suspected COVID	Recruiting	27/03/2020	ClinicalTrials.gov	The Vietnam Chloroquine Treatment on COVID-19	The Vietnam Chloroquine Treatment on COV	Confirmed	Drug: Chloroquine phosphate	;	AM	Chloroquine	Viral clearance time, PCR	;jday@oucru.org	;+84 8 39237954	University of Oxford, UK;	Allocation: Randomized. Intervention model: Parallel Assignment. Primary purpose: Treatment. Masking: None (Open Label).	SARS-CoV-2 Infection;COVID-19	Interventional	6 April 2020	Inclusion	Anti malaria	Chloroquine			Oxford University Clinical Research Unit, Vietnam	20200327	4/7/2020 10:40:56 AM	No	18 Years	N/A
NCT04331808	190	121	https://clinicaltrials.gov/show/NCT04331808	Inclusion	1		Tocilizumab	Anti-IL-6	Europe	France	240	Adults	All	2	Open label	1	0	1	1	Mild/moderate	Not recruiting	31/03/2020	ClinicalTrials.gov	Cohort Multiple Randomized Controlled Trials Open-label of Immune Modulatory Drugs and Other Treatments in COVID-19 Patients - Tocilizumab Trial - CORIMUNO-19 - TOCI (CORIMUNO-TOCI)	Cohort Multiple Randomized Controlled Tr	Moderate	Drug: Tocilizumab		IT	Tocilizumab	Survival without needs of ventilator utilization 14 day AND WHO progression scale <=5 AND Cumulative incidence of successful tracheal extubation AND WHO progression scale at day 4 (including mortality)	ohermine@gmail.com	603707920		Allocation: Randomized. Intervention model: Parallel Assignment. Primary purpose: Treatment. Masking: None (Open Label).	Corona Virus Infection	Interventional	6 April 2020	Inclusion	Immunotherapy	Tocilizumab			Assistance Publique - Hôpitaux de Paris	20200331	4/7/2020 10:40:56 AM	No	18 Years	N/A
NCT04331899	191	122	https://clinicaltrials.gov/show/NCT04331899	Inclusion	1		Peginterferon Lambda-1a	Other immunotherapeutics	North America	United States	120	Adults	All	2	Open label		0		0	Diagnosed/suspected COVID	Recruiting	27/03/2020	ClinicalTrials.gov	Mild COVID-19 Peginterferon Lambda	Mild COVID-19 Peginterferon Lambda	Confirmed	Drug: Peginterferon Lambda-1a;Other: Standard of Care Treatment	;	IT	Peginterferon Lambda-1a	Viral shredding, RT-PCR	;usingh@stanford.edu	;6507234045	Professor (Medicine -Infectious Diseases);	Allocation: Randomized. Intervention model: Single Group Assignment. Primary purpose: Treatment. Masking: None (Open Label).	COVID-19	Interventional	6 April 2020	Exclusion	Observational	eginterferon Lambda-1a			Stanford University	20200327	4/7/2020 10:40:56 AM	No	18 Years	64 Years
NCT04332107	192	123	https://clinicaltrials.gov/show/NCT04332107	Inclusion	1		Azithromycin	Antibiotics/antifungal	North America	United States	2271	Adults	All	3	Quadruple blind		1	1	0	Mild/moderate	Recruiting	30/03/2020	ClinicalTrials.gov	Azithromycin for COVID-19 Treatment in Outpatients Nationwide	Azithromycin for COVID-19 Treatment in O	Mild	Drug: Azithromycin;Drug: Placebos	; ; ;	AB	Azithromycin	Hospitalization 14 day	;;jessica.brogdon@ucsf.edu;jessica.brogdon@ucsf.edu	;;(415) 514-1582;415-514-1582	University of California, San Francisco;University of California, San Francisco;	Allocation: Randomized. Intervention model: Parallel Assignment. Primary purpose: Treatment. Masking: Quadruple (Participant, Care Provider, Investigator, Outcomes Assessor).	COVID-19;SARS-CoV-2	Interventional	6 April 2020	Inclusion	Antibiotic	Azithromycin			University of California, San Francisco	20200330	4/7/2020 10:40:56 AM	No	18 Years	N/A
NCT04334005	193	124	https://clinicaltrials.gov/show/NCT04334005	Inclusion	1		Vitamin D	Dietary supplements	Europe	Spain	200	Adults	All	N/A	Double blind	1	0	1	0	Mild/moderate	Not recruiting	29/03/2020	ClinicalTrials.gov	Vitamin D on Prevention and Treatment of COVID-19	Vitamin D on Prevention and Treatment of	Mild	Dietary Supplement: Vitamin D	;	Dietary supplements	Vitamin D	Mortality 10 week all-cause	;mcgarzon@ugr.es	;+34 649440850	Universidad de Granada;	Allocation: Randomized. Intervention model: Parallel Assignment. Primary purpose: Treatment. Masking: Double (Investigator, Outcomes Assessor).	Patients Infected With COVID-19	Interventional	6 April 2020	Inclusion	Unconventional medicine	Vitamin D			Universidad de Granada	20200329	4/7/2020 10:40:56 AM	No	40 Years	70 Years
NCT04332666	196	125	https://clinicaltrials.gov/show/NCT04332666	Inclusion	1		Angiotensin 1-7	Antihypertensiva	Europe	Belgium	60	Adults	All	3	Triple blind		0		0	Hospitalised/Severe/ICU	Not recruiting	27/03/2020	ClinicalTrials.gov	Angiotensin-(1,7) Treatment in COVID-19: the ATCO Trial	Angiotensin-(1,7) Treatment in COVID-19:	Severe	Drug: Angiotensin 1-7	; ;	AT	Angiotensin 1-7	Ventilator free days 28 day	;;filippo.annoni@erasme.ulb.ac.be	;;0032(0)483141483	Erasme hospital;Minas Gerais University;	Allocation: Randomized. Intervention model: Parallel Assignment. Primary purpose: Treatment. Masking: Triple (Participant, Investigator, Outcomes Assessor).	Coronavirus;Respiratory Failure;Coronavirus Sars-Associated as Cause of Disease Classified Elsewhere;SARS-CoV-2	Interventional	6 April 2020	Inclusion	Adjunct therapy	Angiotensin-(1,7)			Erasme University Hospital	20200327	4/7/2020 10:40:56 AM	No	18 Years	N/A
NCT04332991	197	126	https://clinicaltrials.gov/show/NCT04332991	Inclusion	1		Chloroquine	Antimalaria	North America	United States	510	Adults	All	3	Quadruple blind	1	0	1	1	Hospitalised/Severe/ICU	Not recruiting	31/03/2020	ClinicalTrials.gov	Outcomes Related to COVID-19 Treated With Hydroxychloroquine Among In-patients With Symptomatic Disease	Outcomes Related to COVID-19 Treated Wit	Hospitalised	Drug: Hydroxychloroquine;Drug: Placebo	;	AM	Chloroquine	COSS scores day 15 (including death)	;coldmixon@mgh.harvard.edu	;617 726-4777	Massachusetts General Hospital;	Allocation: Randomized. Intervention model: Parallel Assignment. Primary purpose: Treatment. Masking: Quadruple (Participant, Care Provider, Investigator, Outcomes Assessor).	Coronavirus;Acute Respiratory Infection;SARS-CoV Infection	Interventional	6 April 2020	Inclusion	Anti malaria	Hydroxychloroquine			Massachusetts General Hospital	20200331	4/7/2020 10:40:56 AM	No	18 Years	N/A
NCT04330638	200	127	https://clinicaltrials.gov/show/NCT04330638	Inclusion	1		Anakinra/Siltuximab/Tocilizumab	Other immunotherapeutics	Europe	Belgium	342	Both	All	4	Open label	1	0	1	1	Mild/moderate	Recruiting	31/03/2020	ClinicalTrials.gov	Treatment of COVID-19 Patients With Anti-interleukin Drugs	Treatment of COVID-19 Patients With Anti	Moderate	Other: Usual Care;Drug: Anakinra;Drug: Siltuximab;Drug: Tocilizumab	;	IT	Anakinra/Siltuximab/Tocilizumab	Time to clinical improvement (inclduing mortality)	;anja.delporte@uzgent.be	;+32-9-3320228	University Hospital, Ghent;	Allocation: Randomized. Intervention model: Factorial Assignment. Primary purpose: Treatment. Masking: None (Open Label).	COVID-19	Interventional	6 April 2020	Inclusion	Immunotherapy	Anakinra/Siltuximab/Tocilizumab			University Hospital, Ghent	20200331	4/7/2020 10:40:56 AM	No	8 Years	80 Years
NCT04332835	202	128	https://clinicaltrials.gov/show/NCT04332835	Inclusion	1		Convalescent Plasma	Antibodies	South America	Colombia	80	Adults	All	3	Open label		1	1	0	Mild/moderate	Not recruiting	31/03/2020	ClinicalTrials.gov	Convalescent Plasma for Patients With COVID-19: A Randomized, Open Label, Parallel, Controlled Clinical Study	Convalescent Plasma for Patients With CO	Moderate	Drug: Plasma;Drug: Hydroxychloroquine;Drug: Azithromycin	; ;	IT	Convalescent Plasma	Viral load difference AND change in immunoglobin titers	;anayajm@gmail.com;gustavo.quintero@urosario.edu.co	;+57 321 233 9828;+57 318 3606458	Universidad del Rosario;	Allocation: Randomized. Intervention model: Parallel Assignment. Primary purpose: Treatment. Masking: None (Open Label).	Coronavirus;Coronavirus Infection	Interventional	6 April 2020	Inclusion	Anti malaria/Antibiotic/Immunotherapy	Plasma/Hydroxychloroquine/Azithromycin			Universidad del Rosario	20200331	4/7/2020 10:40:56 AM	No	18 Years	60 Years
NCT04333251	203	129	https://clinicaltrials.gov/show/NCT04333251	Inclusion	1		Convalescent Plasma	Antibodies	North America	United States	115	Adults	All	1	Open label		0		0	Hospitalised/Severe/ICU	Not recruiting	27/03/2020	ClinicalTrials.gov	Study Testing Convalescent Plasma vs Best Supportive Care	Study Testing Convalescent Plasma vs Bes	Hospitalised	Biological: high-titer anti-Sars-CoV-2 plasma		IT	Convalescent Plasma	Ventilation and oxygen support changes				Allocation: Randomized. Intervention model: Parallel Assignment. Primary purpose: Treatment. Masking: None (Open Label).	Pneumonia, Interstitial	Interventional	6 April 2020	Inclusion	Immunotherapy	high-titer anti-Sars-CoV-2 plasma			Baylor Research Institute	20200327	4/7/2020 10:40:56 AM	No	18 Years	N/A
NCT04333407	205	130	https://clinicaltrials.gov/show/NCT04333407	Inclusion	1		Aspirin/Clopidogrel/Rivaroxaban/Atorvastatin/Omeprazole	Other	Europe	United Kingdom	3170	Adults	All	N/A	Open label	1	0	1	1	Hospitalised/Severe/ICU	Recruiting	01/04/2020	ClinicalTrials.gov	Preventing Cardiac Complication of COVID-19 Disease With Early Acute Coronary Syndrome Therapy: A Randomised Controlled Trial.	Preventing Cardiac Complication of COVID	Hospitalised	Drug: Aspirin 75mg;Drug: Clopidogrel 75mg;Drug: Rivaroxaban 2.5 MG;Drug: Atorvastatin 40mg;Drug: Omeprazole 20mg	;	AT	Aspirin/Clopidogrel/Rivaroxaban/Atorvastatin/Omeprazole	Mortality 30 day all-cause	;alena.marynina@nhs.net	;07404750659	Imperial College Healthcare NHS Trust;	Allocation: Randomized. Intervention model: Parallel Assignment. Primary purpose: Treatment. Masking: None (Open Label).	COVID-19	Interventional	6 April 2020	Inclusion	Adjunct therapy	Aspirin/Clopidogrel/Rivaroxaban/Atorvastatin/Omeprazole			Imperial College London	20200401	4/7/2020 10:40:56 AM	No	18 Years	85 Years
NCT04333550	206	131	https://clinicaltrials.gov/show/NCT04333550	Inclusion	1		Deferoxamine	Other	Asia	Iran	50	Both	All	2	Double blind	1	0	1	0	Diagnosed/suspected COVID	Recruiting	01/04/2020	ClinicalTrials.gov	Application of Desferal to Treat COVID-19	Application of Desferal to Treat COVID-1	Confirmed	Drug: Deferoxamine	; ; ; ;	AT	Deferoxamine	Mortality 20 day all-cause	;;;alireza_ghaffarieh@meei.harvard.edu;	;;;+1-608-698-7334;	Regenerative Medicine Research Center, Kermanshah University of Medical Sciences, Kermanshah, Iran;Regenerative Medicine Research Center, Kermanshah University of Medical Sciences, Kermanshah, Iran;Regenerative Medicine Research Center, Kermanshah University of Medical Sciences, Kermanshah, Iran;	Allocation: Randomized. Intervention model: Parallel Assignment. Primary purpose: Treatment. Masking: Double (Participant, Investigator).	COVID-19	Interventional	6 April 2020	Inclusion	Unconventional medicine	Deferoxamine			Kermanshah University of Medical Sciences	20200401	4/7/2020 10:40:56 AM	No	3 Years	99 Years
NCT04333732	207	132	https://clinicaltrials.gov/show/NCT04333732	Inclusion	1		Chloroquine	Antimalaria	Intercontinental	International	55000	Adults	All	2	Single blind		0		1	Prevention	Not recruiting	31/03/2020	ClinicalTrials.gov	CROWN CORONATION: Chloroquine RepurpOsing to healthWorkers for Novel CORONAvirus mitigaTION	CROWN CORONATION: Chloroquine RepurpOsin	Prevention	Drug: Low-dose chloroquine/hydroxychloroquine;Drug: Mid dose chloroquine or hydroxychloroquine;Drug: High does chloroquine or hydroxychloroquine;Drug: Placebo	; ; ;	AM	Chloroquine	Incidence COVID-19, symptomatic AND peak severity of COVID-19	;;;lindayun@wustl.edu	;;;314-273-2240	Washington Univeristy School of Medicine;University College, London;Wits University;	Allocation: Randomized. Intervention model: Parallel Assignment. Primary purpose: Prevention. Masking: Single (Participant).	COVID 19	Interventional	6 April 2020	Exclusion	Prevention				Washington University School of Medicine	20200331	4/7/2020 10:40:56 AM	No	18 Years	N/A
ISRCTN16912075	210	133	http://isrctn.com/ISRCTN16912075	Inclusion	1		CPAP/high-flow nasal oxygen	Respiratory adjuncts (ventilator / gas)	Europe	United Kingdom	4002	Adults	All	N/A	Open label	1	0	1	1	Hospitalised/Severe/ICU	Recruiting	06/04/2020	ISRCTN	RECOVERY Respiratory Support: Respiratory Strategies in patients with coronavirus COVID-19 – CPAP, high-flow nasal oxygen, and standard care	RECOVERY Respiratory Support: Respirator	Severe	<br> Patients will be randomised in a 1:1:1 ratio to:<br> Arm 1: Continuous positive airway pressure (CPAP), administered according to local protocol/guidelines. Administration will be left to clinical discretion.<br> Arm 2: High flow nasal oxygen (HFNO) will be administered according to local protocol/guidelines. Administration will be left to clinical discretion.<br> Arm 3: Standard care. Stand…	Keith	AT	CPAP/high-flow nasal oxygen	Mortality 30 day AND tracheal intubation	k.couper@warwick.ac.uk	442476151179		Adaptive (group-sequential), pragmatic, randomised controlled, open-label, multi-centre, effectiveness trial (Treatment)	Respiratory failure in patients with known or suspected COVID-19 (SARS-CoV-2 infection) <br>Respiratory <br>COVID-19 (SARS-CoV-2 infection)	Interventional	6 April 2020	Inclusion	Adjunct therapy	CPAP/HFNO			University of Warwick	20200406	4/7/2020 10:40:56 AM	No	18
ISRCTN83971151	211	134	http://isrctn.com/ISRCTN83971151	Inclusion	1		Chloroquine + other	Other drug combinations	Intercontinental	International	10000	Adults	All	3	Open label	1	0	1	1	Hospitalised/Severe/ICU	Recruiting	25/03/2020	ISRCTN	Public health emergency SOLIDARITY trial of treatments for COVID-19 infection in hospitalized patients	Public health emergency SOLIDARITY trial	Hospitalised	<br> Adults (aged =18 years) recently hospitalized, or already in the hospital, with definite COVID-19 and, in the view of the responsible doctor, no contra-indication to any of the study drugs will be randomly allocated between five groups:<br> 1. Local standard of care alone<br> OR local standard of care plus one of<br> 2. Remdesivir (daily infusion for 10 days)<br> 3. Chloroquine or hydroxychl…		AV/AM/IT	Remdesivir/Chloroquine/Lopinavir/ritonavir/interferon-beta	Mortality all-cause				Open-label randomized multicountry clinical trial (Treatment)	COVID-19 (SARS-CoV-2 infection) <br>Infections and Infestations <br>COVID-19 (SARS-CoV-2 infection)	Interventional	6 April 2020	Inclusion	AV/Immunotherapy/Anti malaria	Remdesivir/Lopinavir+ritonavir/Lopinavir+ritonavir+interferon-beta/ChloroquineORhydroxychloroquine			World Health Organization	20200325	4/7/2020 10:40:56 AM	No	18
NCT04333472	212	135	https://clinicaltrials.gov/show/NCT04333472	Inclusion	1		Piclidenoson	Antiinflammatory	Asia	Israel	40	Adults	All	2	Open label		1	1	0	Hospitalised/Severe/ICU	Not recruiting	01/04/2020	ClinicalTrials.gov	Piclidenoson for Treatment of COVID-19	Piclidenoson for Treatment of COVID-19	Hospitalised	Drug: Piclidenoson	;	AI	Piclidenoson	Viral shredding duration AND time to clinical improvement AND SAE	;Zivit@canfite.co.il	;+972-3-9241114	Can-Fite BioPharma Ltd;	Allocation: Randomized. Intervention model: Parallel Assignment. Primary purpose: Treatment. Masking: None (Open Label).	COVID-19;Coronavirus Infection	Interventional	6 April 2020	Inclusion	Immunotherapy	Piclidenoson			Can-Fite BioPharma	20200401	4/7/2020 10:40:56 AM	No	18 Years	N/A
NCT04333914	213	136	https://clinicaltrials.gov/show/NCT04333914	Inclusion	1		Chloroquine + other	Other drug combinations	Europe	France	273	Adults	All	2	Open label	1	0	1	1	Mild/moderate	Not recruiting	01/04/2020	ClinicalTrials.gov	Prospective Study in Patients With Advanced or Metastatic Cancer and SARS-CoV-2 (COVID-19) Infection	Prospective Study in Patients With Advan	Mild/moderate	Drug: Chloroquine analog (GNS651);Drug: Nivolumab;Drug: Tocilizumab;Other: Standard of care	; ;	AM/IT	Chloroquine/Nivolumab/Tocilizumab	Mortality 28 day	;julien.gautier@lyon.unicancer.fr;philippe.cassier@lyon.unicancer.fr	;+33 4.26.55.68.29;	Centre Leon Berard;	Allocation: Randomized. Intervention model: Parallel Assignment. Primary purpose: Treatment. Masking: None (Open Label).	SARS-CoV-2 (COVID-19) Infection;Advanced or Metastatic Hematological or Solid Tumor	Interventional	6 April 2020	Inclusion	Anti malaria/Immunotherapy	Chloroquine/Nivolumab/Tocilizumab			Centre Leon Berard	20200401	4/7/2020 10:40:56 AM	No	18 Years	N/A
ACTRN12620000445976	216	137	https://anzctr.org.au/ACTRN12620000445976.aspx	Inclusion	1		Chloroquine + other	Antimalaria_antiviral/antibiotic	Australasia	International	2500	Adults	All	3	Open label		1	1	1	Hospitalised/Severe/ICU	Recruiting	06/04/2020	ANZCTR	To compare the effectiveness of two drugs (hydroxychloroquine and lopinavir/ritonavir alone or combined in treating hospitalized patients with confirmed COVID-19 compared to standard of care	To compare the effectiveness of two drug	Hospitalised	Intervention 1<br>Intervention Type: Drug<br>Intervention Administration: Oral<br>Intervention Name: Lopinavir/ritonavir<br>Intervention Description: Lopinavir (400mg)/ritonavir (100mg) twice daily for 10 days<br>Intervention Adherence: direct supervision while in hospital. Once home, adherence will be monitored through daily phone calls<br><br>Intervention 2<br>Intervention Type: Drug<br>Interve…		AM/AV	Chloroquine/lopinavir/ritonavir	Alive not requiring intensive respiratory support				Purpose: Treatment; Allocation: Randomised controlled trial; Masking: Open (masking not used);Assignment: Factorial;Type of endpoint: Efficacy;	COVID-19 (SARS-CoV-2); <br>COVID-19 (SARS-CoV-2);Infection - Other infectious diseases;Respiratory - Other respiratory disorders / diseases	Interventional	6 April 2020	Inclusion	AV/Anti malaria	hydroxychloroquine+lopinavir+ritonavir/hydroxychloroquine/lopinavir+ritonavir			University of Melbourne	20200406	4/7/2020 10:40:56 AM	No	18 Years	No limit
ACTRN12620000417987	217	138	https://anzctr.org.au/ACTRN12620000417987.aspx	Inclusion	1		Chloroquine	Antimalaria	Australasia	Australia	680	Adults	All	4	Open label		0		1	Prevention	Recruiting	30/03/2020	ANZCTR	Chloroquine Chemorophylaxis Countermeasure against COVID-19	Chloroquine Chemorophylaxis Countermeasu	Prevention	Oral 500mg chloroquine phosphate tablets prophylactic weekly regimen against COVID-19 over 10 week trial period followed with plasma chloroquine levels.		AM	Chloroquine	Sick days				Purpose: Prevention; Allocation: Randomised controlled trial; Masking: Open (masking not used);Assignment: Parallel;Type of endpoint: Efficacy;	COVID-19 Infection; <br>COVID-19 Infection;Infection - Other infectious diseases	Interventional	6 April 2020	Exclusion	Prevention				Australian Defence Force Malaria and Infectious Disease Institute	20200330	4/7/2020 10:40:56 AM	No	18 Years	64 Years
EUCTR2020-001243-15-BE	223	139	https://www.clinicaltrialsregister.eu/ctr-search/search?query=eudract_number:2020-001243-15	Inclusion	1		Itraconazole	Antibiotics/antifungal	Europe	Belgium	200	N/A	All	2	Open label	1	0	1	0	Diagnosed/suspected COVID	Completed	27/03/2020	EU Clinical Trials Register	Covid-19: A randomized, open-label, adaptive, proof-of- concept clinical trial of new antiviral drug candidates against SARS-CoV-2.	Covid-19: A randomized, open-label, adap	Confirmed	<br>Product Name: itraconazole<br>Pharmaceutical Form: Capsule, hard<br>INN or Proposed INN: ITRACONAZOLE<br>CAS Number: 84625-61-6<br><br>Product Name: itraconazole<br>Pharmaceutical Form: Oral solution<br>INN or Proposed INN: ITRACONAZOLE<br>CAS Number: 84625-61-6<br><br>	Laurens Liesenborghs	AF	ITRACONAZOLE	Clinical status day 7 (including death)	laurens.liesenborghs@uzleuven.be		UZ Leuven	Controlled: yes Randomised: yes Open: yes Single blind: no Double blind: no Parallel group: no Cross over: no Other: no If controlled, specify comparator, Other Medicinial Product: no Placebo: no Other: yes Other specify the comparator: Best clinical practice Number of treatment arms in the trial: 2	COVID-19 <br>MedDRA version: 20.0 Level: LLT Classification code 10038700 Term: Respiratory infection System Organ Class: 100000004862 ;Therapeutic area: Diseases [C] - Virus Diseases [C02]	Interventional	30 March 2020	Inclusion	Antifungal	itraconazole			UZLeuven	20200327	4/7/2020 10:40:56 AM	No
EUCTR2020-000919-69-NL	224	140	https://www.clinicaltrialsregister.eu/ctr-search/search?query=eudract_number:2020-000919-69	Inclusion	1		BCG vaccine	Vaccine	Europe	Netherlands	1000	N/A	All	4	Double blind		1	1	1	Prevention	Recruiting	17/03/2020	EU Clinical Trials Register	Reducing health care workers absenteeism in Coronavirus 2019 pandemic nu enhancement of the immune system through vaccination with Bacillus Calmette-Guérin	Reducing health care workers absenteeism	Prevention	<br>Trade Name: BCG vaccine (BCG-Vaccin SSI [Nederlands VaccinStatens Serum Instituut]) Danish strain 1331.<br>Pharmaceutical Form: Concentrate and solvent for solution for injection<br>Pharmaceutical form of the placebo: Concentrate and solvent for solution for injection<br>Route of administration of the placebo: Intradermal use<br><br>	Marc J. M. Bonten	Vaccine	BCG	Unplanned absenteeism	M.J.M.Bonten@umcutrecht.nl	00318875 503 50	University Medical Center Utrecht	Controlled: yes Randomised: yes Open: no Single blind: no Double blind: yes Parallel group: no Cross over: no Other: no If controlled, specify comparator, Other Medicinial Product: no Placebo: yes Other: no Number of treatment arms in the trial: 2	SARS-CoV-2 infection <br>MedDRA version: 20.0 Level: HLT Classification code 10047490 Term: Virus identification and serology System Organ Class: 100000004848 ;Therapeutic area: Diseases [C] - Virus Diseases [C02]	Interventional	30 March 2020	Exclusion	Vaccination				University Medical Center	20200317	4/7/2020 10:40:56 AM	No
EUCTR2020-000982-18-NO	226	141	https://www.clinicaltrialsregister.eu/ctr-search/search?query=eudract_number:2020-000982-18	Inclusion	1		Chloroquine	Antimalaria	Europe	Norway	443	N/A	All	4	Open label	1	0	1	1	Hospitalised/Severe/ICU	Recruiting	24/03/2020	EU Clinical Trials Register	A clinical study to evaluate the efficacy of different anti-viral drugs in SARS-CoV-2 infected patients (COVID-19)	A clinical study to evaluate the efficac	Hospitalised	<br>Trade Name: Plaquenil<br>Product Name: Plaquenil<br>Pharmaceutical Form: Film-coated tablet<br><br>	Sect. Clin. Imm. & Infect. Diseases	AM	Chloroquine	Mortality in-hospital	andreas.barrattdue@gmail.com	4723071916	Oslo university hospital	Controlled: yes Randomised: yes Open: no Single blind: no Double blind: no Parallel group: no Cross over: no Other: no If controlled, specify comparator, Other Medicinial Product: yes Placebo: no Other: yes Other specify the comparator: Standard of care Number of treatment arms in the trial: 2	SARS-COV-2 infection <br>MedDRA version: 21.1 Level: LLT Classification code 10037373 Term: Pulmonary disorder System Organ Class: 100000004855 ;Therapeutic area: Diseases [C] - Virus Diseases [C02]	Interventional	30 March 2020	Inclusion	Anti malaria	Hydroxychloroquine			Oslo University Hospital	20200324	4/7/2020 10:40:56 AM	No
EUCTR2020-001023-14-GB	227	142	https://www.clinicaltrialsregister.eu/ctr-search/search?query=eudract_number:2020-001023-14	Inclusion	1		INF-Beta	Other immunotherapeutics	Europe	United Kingdom	400	Adults	All	2	Double blind	1	0	1	1	Diagnosed/suspected COVID	Recruiting	17/03/2020	EU Clinical Trials Register	a trial of an inhaled antiviral drug to treat or prevent severe respiratory difficulties in patients with COVID-19	a trial of an inhaled antiviral drug to	Confirmed	<br>Product Name: Interferon beat-1a (IFN-ß1a)<br>Product Code: SNG001<br>Pharmaceutical Form: Inhalation solution<br>INN or Proposed INN: Interferon beta-1a<br>Current Sponsor code: SNG001<br>Concentration unit: million IU million international units<br>Concentration type: equal<br>Concentration number: 6-<br>Pharmaceutical form of the placebo: Nebulisation solution<br>Route of administration of…	Jody Brookes	IT	Interferon beat-1a (IFN-ß1a)	COSS scores day 14 (including death)	jody.brookes@synairgen.com	2380512800	Synairgen Research Ltd	Controlled: yes Randomised: yes Open: no Single blind: no Double blind: yes Parallel group: no Cross over: no Other: no If controlled, specify comparator, Other Medicinial Product: no Placebo: yes Other: no Number of treatment arms in the trial: 2	COVID-19 <br>MedDRA version: 20.0 Level: LLT Classification code 10051905 Term: Coronavirus infection System Organ Class: 100000004862 ;Therapeutic area: Diseases [C] - Virus Diseases [C02]	Interventional	30 March 2020	Inclusion	Immunotherapy	Interferon beat-1a			Synairgen Research Limited	20200317	4/7/2020 10:40:56 AM	No
EUCTR2020-001236-10-NL	229	143	https://www.clinicaltrialsregister.eu/ctr-search/search?query=eudract_number:2020-001236-10	Inclusion	1		Imatinib	Other immunotherapeutics	Europe	Netherlands	304	N/A	All	2	Single blind	1	0	1	1	Hospitalised/Severe/ICU	Recruiting	31/03/2020	EU Clinical Trials Register	Countering Lung Damage in COVID-19 infection: the CounterCovid Study	Countering Lung Damage in COVID-19 infec	Severe	<br>Trade Name: Imatinib mesilate <br>Product Name: Imatinib mesilate<br>Product Code: L01XE01<br>Pharmaceutical Form: Tablet<br>Pharmaceutical form of the placebo: Tablet<br>Route of administration of the placebo: Oral use<br><br>	Jurjan Aman	IT	Imatinib	Mortality day 28 or need for intubation or ECMO	j.aman@amsterdamumc.nl	31610738910	Amsterdam UMC	Controlled: yes<br>Randomised: yes<br>Open: no<br>Single blind: yes<br>Double blind: no<br>Parallel group: no<br>Cross over: no<br>Other: no<br>If controlled, specify comparator, Other Medicinial Product: yes<br>Placebo: yes<br>Other: no<br>Number of treatment arms in the trial: 2<br>	Covid19 is characterized by hypoxemic respiratory failure, caused by extensive vascular leak and pulmonary edema early in the course of disease.;Therapeutic area: Diseases [C] - Respiratory Tract Diseases [C08]	Interventional	6 April 2020	Inclusion	Immunotherapy	Imatinib			Amsterdam UMC	20200331	4/7/2020 10:40:56 AM	No
ChiCTR2000029941	242	144	http://www.chictr.org.cn/showproj.aspx?proj=49596	Inclusion	1		TCM	UCM	Asia	China	200	Adults	All	N/A	Not specified		0		1	Diagnosed/suspected COVID	Not Recruiting	2020-02-16	ChiCTR	A randomized controlled trial for Traditional Chinese Medicine in the treatment for Novel Coronavirus Pneumonia (COVID-19)	A randomized controlled trial for Tradit	Pneumonia	experimental group :Traditional Chinese medicine compound granules + western medicine symptomatic treatment ;control group:western medicine symptomatic treatment ;	LU Zhenhui	TCM	TCM	Number of worsening events	tcmdoctorlu@163.com	+86 13817729859	Longhua Hospital Affiliated to Shanghai University of Traditional Chinese Medicine	Parallel	Novel Coronavirus Pneumonia (COVID-19)	Interventional	17 February 2020	Inclusion	Unconventional medicine	TCM (NS)			Longhua Hospital Affiliated to Shanghai University of Traditional Chinese Medicine	20200216	4/7/2020 10:40:56 AM	No	18	75
ChiCTR2000029939	243	145	http://www.chictr.org.cn/showproj.aspx?proj=49612	Inclusion	1		Chloroquine	Antimalaria	Asia	China	100	N/A	All	N/A	Not specified		1	1	0	Diagnosed/suspected COVID	Recruiting	2020-02-16	ChiCTR	A Single-blind, Randomized, Controlled Clinical Trial for Chloroquine Phosphate in the treatment of Novel Coronavirus Pneumonia 2019 (COVID-19)	A Single-blind, Randomized, Controlled C	N/A	Conventional treatment group:The conventional treatment group will be treated according to the guidance of the “Diagnosis and Treatment Scheme of COVID-19” published by the National Health Commission.;Experimental group:conventional treatment combined with Chloroquine Phosphate.;	Ting Cai	AM	Chloroquine	Length of hospital stay	caiting@ucas.ac.cn	+86 13738498188	HwaMei Hospital, University of Chinese Academy of Sciences	Parallel	Novel Coronavirus Pneumonia (COVID-19)	Interventional	17 February 2020	Inclusion	Anti malaria	Chloroquine			HwaMei Hospital, University of Chinese Academy of Sciences	20200216	4/7/2020 10:40:56 AM	No
ChiCTR2000029947	244	146	http://www.chictr.org.cn/showproj.aspx?proj=49599	Inclusion	1		TCM	UCM	Asia	China	200	Adults	All	N/A	Not specified		0		1	Hospitalised/Severe/ICU	Not Recruiting	2020-02-16	ChiCTR	A Randomized Controlled Trial for Qingyi No. 4 Compound in the treatment of Convalescence Patients of Novel Coronavirus Pneumonia (COVID-19)	A Randomized Controlled Trial for Qingyi	Severe	experimental group :Traditional Chinese medicine compound granules + western medicine symptomatic treatment;control group :western medicine symptomatic treatment ;	LU Zhenhui	TCM	TCM	Lung function	tcmdoctorlu@163.com	+86 13817729859	Longhua Hospital Affiliated to Shanghai University of Traditional Chinese Medicine	Parallel	Novel Coronavirus Pneumonia (COVID-19)	Interventional	17 February 2020	Inclusion	Unconventional medicine	TCM (Qingyi No. 4)			Longhua Hospital Affiliated to Shanghai University of Traditional Chinese Medicine	20200216	4/7/2020 10:40:56 AM	No	18	75
ChiCTR2000029869	247	147	http://www.chictr.org.cn/showproj.aspx?proj=49486	Inclusion	1		TCM	UCM	Asia	China	300	Adults	All	1	Not specified		1	1	1	Diagnosed/suspected COVID	Not Recruiting	2020-02-15	ChiCTR	A multicenter, randomized, controlled trial for integrated Chinese and western medicine in the treatment of ordinary novel coronavirus pneumonia (COVID-19) based on the ' Internal and External Relieving -Truncated Torsion' strategy	A multicenter, randomized, controlled tr	Pneumonia	experimental group:Truncated Torsion' Formula and Routine treatment of Western Medicine;control group:Routine treatment of Western Medicine;	Tingrong Huang, Bangjiang Fang, Jun Feng, Jianguo Zuo, Gang Wang	TCM	TCM	14 day outcome of the subjects	fangbji@163.com	+86 0714-6224162	Huangshi Hospital of Traditional Chinese Medicine	Parallel	Novel Coronavirus Pneumonia (COVID-19)	Interventional	17 February 2020	Inclusion	Unconventional medicine	TCM (Truncated Torsion' Formula)			Huangshi Hospital of Traditional Chinese Medicine	20200215	4/7/2020 10:40:56 AM	No	18	80
ChiCTR2000029811	248	148	http://www.chictr.org.cn/showproj.aspx?proj=49355	Inclusion	1		TCM	UCM	Asia	China	60	Adults	All	N/A	Open label		0		0	Hospitalised/Severe/ICU	Not Recruiting	2020-02-14	ChiCTR	Clinical Study for Anti-aging Active Freeze-dried Powder Granules in the Treatment of Acute Novel Coronavirus Pneumonia (COVID-19)	Clinical Study for Anti-aging Active Fre	Severe	Experimental group:Conventional treatment+Anti-aging Active Freeze-dried Powder Granules;Control group:Conventional treatment;	Chao Xu	TCM	TCM	Time to disease recovery	164972769@qq.com	+86 15018720816		Parallel	novel coronavirus pneumonia (COVID-19)	Interventional	17 February 2020	Inclusion	Unconventional medicine	Anti-aging Active Freeze-dried Powder			Guangzhou reborn health management consultation co., LTD	20200214	4/7/2020 10:40:56 AM	No	18
ChiCTR2000029867	249	149	http://www.chictr.org.cn/showproj.aspx?proj=49514	Inclusion	1		Ritonavir/Lopinavir/Carrimycin	Other drug combinations	Asia	China	520	Adults	All	1	Open label		0		1	Diagnosed/suspected COVID	Recruiting	2020-02-15	ChiCTR	The efficacy and safety of carrimycin treatment in patients with novel coronavirus pneumonia (COVID-19): a multicenter, randomized, open-label, controlled trial	The efficacy and safety of carrimycin tr	Confirmed	Experimental group:Carrimycin;Control group:Lopinavir and Ritonavir Tablets;	Ronghua Jin	AV/AB	Ritonavir/Lopinavir/Carrimycin	Body temperature returns to normal time	dinghuiguo@medmail.com.cn	+86 13811611118	Beijing You'an Hospital, Capital Medical University	Parallel	Novel Coronavirus Pneumonia (COVID-19)	Interventional	17 February 2020	Inclusion	Antibiotic/AV	Carrimycin/Lopinavir+Ritonavir			Beijing You'an Hospital, Capital Medical University	20200215	4/7/2020 10:40:56 AM	No	18	75
ChiCTR2000029849	250	150	http://www.chictr.org.cn/showproj.aspx?proj=49530	Inclusion	1		Regulating intestinal flora	Other	Asia	China	60	Adults	All	N/A	Not specified	1	0	1	0	Hospitalised/Severe/ICU	Recruiting	2020-02-15	ChiCTR	Application of Regulating Intestinal Flora in the Treatment of Severe Novel Coronavirus Pneumonia (COVID-19)	Application of Regulating Intestinal Flo	Severe	Experimental group:Regulating intestinal flora + conventional treatment;Control group:conventional treatment;	Huaqi Wang	AT	Regulating intestinal flora	Mortality	wanghuaqi2004@126.com	+86 15890689220	The First Affiliated Hospital of Zhengzhou University	Parallel	Novel Coronavirus Pneumonia (COVID-19)	Interventional	17 February 2020	Inclusion	Unconventional medicine	Regulating intestinal flora			The First Affiliated Hospital of Zhengzhou University	20200215	4/7/2020 10:40:56 AM	No	18	75
ChiCTR2000029855	251	151	http://www.chictr.org.cn/showproj.aspx?proj=49543	Inclusion	1		TCM	UCM	Asia	China	180	Adults	All	N/A	Not specified		0		0	Diagnosed/suspected COVID	Recruiting	2020-02-15	ChiCTR	A randomized, open and controlled clinical trial for traditional Chinese medicine in the treatment of novel coronavirus pneumonia (COVID-19)	A randomized, open and controlled clinic	Pneumonia	Chinese traditional medicine group 1:Traditional Chinese medicine qingfei prescription treatment;Chinese traditional medicine group 2:Traditional Chinese medicine clear lung prescription and compound houttuynia mixture treatment;Control group:Conventional treatment;	Wu Guolin	TCM	TCM	TCM symptom score	wuguolin28@163.com	+86 13136150848	The First Affiliated Hospital of Medical College of Zhejiang University	Parallel	Novel Coronavirus Pneumonia (COVID-19)	Interventional	17 February 2020	Inclusion	Unconventional medicine	TCM (NS)			The First Affiliated Hospital of Medical College of Zhejiang University	20200215	4/7/2020 10:40:56 AM	No	18	75
ChiCTR2000029789	252	152	http://www.chictr.org.cn/showproj.aspx?proj=49348	Inclusion	1		TCM	UCM	Asia	China	100	Adults	All	N/A	Not specified		0		1	Diagnosed/suspected COVID	Recruiting	2020-02-13	ChiCTR	Randomized controlled trial for TCM syndrome differentiation treatment impacting quality of life of post-discharge patients with novel coronavirus pneumonia (COVID-19)	Randomized controlled trial for TCM synd	Confirmed	Experimental group:TCM based on symptomatic treatment;Control group:Placebo TCM based on symptomatic treatment;	Li Jiansheng	TCM	TCM	St. George's Respiratory Questionnaire	li_js8@163.com	+86 371-65676568	He'nan University of Chinese Medicine	Parallel	Novel Coronavirus Pneumonia (COVID-19)	Interventional	17 February 2020	Inclusion	Unconventional medicine	TCM (NS)			The First Affiliated Hospital of He'nan University of Chinese Medicine	20200213	4/7/2020 10:40:56 AM	No	18	90
ChiCTR2000029822	253	153	http://www.chictr.org.cn/showproj.aspx?proj=49502	Inclusion	1		TCM	UCM	Asia	China	110	Both	All	N/A	Open label		0		0	Diagnosed/suspected COVID	Recruiting	2020-02-14	ChiCTR	A randomized controlled trial for honeysuckle decoction in the treatment of patients with novel coronavirus (COVID-19) infection	A randomized controlled trial for honeys	Pneumonia	Experimental group:honeysuckle decoction;Control group:placebo;	Yongxiang Yi	TCM	TCM	rate of cure	ian0126@126.com	+86 13338628626	Nanjing Second Hospital	Parallel	Novel Coronavirus Pneumonia (COVID-19)	Interventional	17 February 2020	Inclusion	Unconventional medicine	TCM (honeysuckle decoction)			Nanjing Second Hospital	20200214	4/7/2020 10:40:56 AM	No	0	100
ChiCTR2000029853	255	154	http://www.chictr.org.cn/showproj.aspx?proj=49532	Inclusion	1		Azvudine	Antiviral	Asia	China	20	Adults	All	N/A	Not specified		1	1	0	Diagnosed/suspected COVID	Recruiting	2020-02-15	ChiCTR	A randomized, open-label, controlled clinical trial for azvudine in the treatment of novel coronavirus pneumonia (COVID-19)	A randomized, open-label, controlled cli	Pneumonia	Experimental group:Oral administration of 5 tablets of 1mg Azvudine tablets daily;Control group:According to the "Pneumonia Diagnosis and Treatment Plan for New Coronavirus Infection (Trial Version 5)" issued by National Health Commission of People's Republic of China, the subjects were given corresponding treatment.;	Pei Guangzhong	AV	Azvudine	time and rate of temperature return to normal	503818505@qq.com	+86 13839708181	People's Hospital of Guangshan County	Parallel	Novel Coronavirus Pneumonia (COVID-19)	Interventional	17 February 2020	Inclusion	AV	Azvudine			People's Hospital of Guangshan County	20200215	4/7/2020 10:40:56 AM	No	18
ChiCTR2000029813	256	155	http://www.chictr.org.cn/showproj.aspx?proj=49425	Inclusion	1		TCM	UCM	Asia	China	72	Adults	All	N/A	Open label		0		0	Diagnosed/suspected COVID	Recruiting	2020-02-14	ChiCTR	Clinical Trial for Tanreqing Capsules in the Treatment of Novel Coronavirus Pneumonia (COVID-19)	Clinical Trial for Tanreqing Capsules in	Pneumonia	Experimental group:Conventional Treatment & Tanreqing Capsules (oral, 3 capsules at a time, 3 times a day);Control Group:Conventional Treatment;	Hongzhou Lu, Xiaorong Chen	TCM	TCM	Time of viral nucleic acid turns negative	luhongzhou@fudan.edu.cn	+86 18930810088	Shanghai Public Health Clinical Center	Parallel	Novel Coronavirus Pneumonia (COVID-19)	Interventional	17 February 2020	Inclusion	Unconventional medicine	TCM (Tanreqing)			Shanghai Public Health Clinical Center	20200214	4/7/2020 10:40:56 AM	No	18	75
ChiCTR2000029806	257	156	http://www.chictr.org.cn/showproj.aspx?proj=49161	Inclusion	1		Thymosin/Camrelizumab	Other immunotherapeutics	Asia	China	120	Adults	All	N/A	Not specified		0		0	Hospitalised/Severe/ICU	Recruiting	2020-02-14	ChiCTR	Immunomodulatory Therapy for Severe Novel Coronavirus Pneumonia (COVID-19)	Immunomodulatory Therapy for Severe Nove	Severe	Thymosin treatment group:Thymosin for injection 1.6 mg sc qd for 5 days;PD-1 treatment group:Camrelizumab 200 mg single dose, diluted to 100 ml intravenous infusion;Conventional treatment group:Conventional treatment;	Xia Jiaan	IT	Thymosin/Camrelizumab	lung injury score reduction	3131862959@qq.com	+86 13871120171	Wuhan Jinyintan Hospital (Wuhan Infectious Diseases Hospital)	Parallel	Novel Coronavirus Pneumonia (COVID-19)	Interventional	17 February 2020	Inclusion	Adjunct therapy/Immunotherapy	Thymosin/Camrelizumab			Wuhan Jinyintan Hospital (Wuhan Infectious Diseases Hospital)	20200214	4/7/2020 10:40:56 AM	No	18
ChiCTR2000029777	258	157	http://www.chictr.org.cn/showproj.aspx?proj=49380	Inclusion	1		TCM	UCM	Asia	China	160	Adults	All	N/A	Not specified	1	0	1	1	Hospitalised/Severe/ICU	Recruiting	2020-02-13	ChiCTR	A multicenter, randomized, controlled trial for integrated chinese and western medicine in the treatment of novel coronavirus pneumonia (COVID-19) based on the 'Truncated Torsion' strategy	A multicenter, randomized, controlled tr	Severe	experimental group:Truncation and Torsion Formula and Routine treatment of Western Medicine;control group:Routine treatment of Western Medicine;	Tingrong Huang, Bangjiang Fang, Jun Feng, Jianguo Zuo, Gang Wang	TCM	TCM	14 day outcome, incl mortality	fangbji@163.com	+86 0714-6224162	Huangshi Hospital of Traditional Chinese Medicine	Parallel	severe novel coronavirus pneumonia (COVID-19)	Interventional	17 February 2020	Inclusion	Unconventional medicine	TCM (Truncation and Torsion Formula)			Huangshi Hospital of Traditional Chinese Medicine	20200213	4/7/2020 10:40:56 AM	No	18	80
ChiCTR2000029776	259	158	http://www.chictr.org.cn/showproj.aspx?proj=49342	Inclusion	1		Polyinosinic-Polycytidylic Acid	Other immunotherapeutics	Asia	China	40	N/A	All	1	Open label		0		1	Diagnosed/suspected COVID	Recruiting	2020-02-13	ChiCTR	A randomized, open-label, blank-controlled, multicenter trial for Polyinosinic-Polycytidylic Acid Injection in the treatment of novel coronavirus pneumonia (COVID-19)	A randomized, open-label, blank-controll	Pneumonia	experimental group:Polyinosinic-Polycytidylic Acid Injection and conventional therapy;control group:conventional therapy;	Xiaoyin Huang	IT	Polyinosinic-Polycytidylic Acid	Time to Clinical recovery	zjwzhxy@126.com	+86 13819711719	The First Affiliated of Wenzhou Medical University	Parallel	Novel Coronavirus Pneumonia (COVID-19)	Interventional	17 February 2020	Inclusion	Immunotherapy	Polyinosinic-Polycytidylic Acid Injection			The First Affiliated of Wenzhou Medical University	20200213	4/7/2020 10:40:56 AM	No
ChiCTR2000029790	261	159	http://www.chictr.org.cn/showproj.aspx?proj=49453	Inclusion	1		TCM	UCM	Asia	China	120	Adults	All	N/A	Not specified		0		0	Diagnosed/suspected COVID	Recruiting	2020-02-13	ChiCTR	Clinical study for the integration of traditional Chinese and western medicine in the treatment of novel coronavirus pneumonia (COVID-19)	Clinical study for the integration of tr	N/A	Control group:Western medicine basic treatment;Experimental group:Western medicine basic treatment combined with traditional Chinese medicine;	Lixin Wang	TCM	TCM	TCM symptoms efficacy	wlx1126@hotmail.com	+86 18917962300	Shanghai Pulmonary Hospital	Parallel	Novel Coronavirus Pneumonia (COVID-19)	Interventional	17 February 2020	Inclusion	Unconventional medicine	TCM (NS)			Shanghai Pulmonary Hospital	20200213	4/7/2020 10:40:56 AM	No	18	80
ChiCTR2000029788	262	160	http://www.chictr.org.cn/showproj.aspx?proj=49452	Inclusion	1		TCM	UCM	Asia	China	60	Adults	All	N/A	Not specified		0		0	Diagnosed/suspected COVID	Not Recruiting	2020-02-13	ChiCTR	Traditional Chinese medicine cooperative therapy for patients with novel coronavirus pneumonia (COVID-19): a randomized controlled trial	Traditional Chinese medicine cooperative	Pneumonia	Control group :Western medicine routine treatment plan;Intervention group :Western medicine routine treatment plan plus TCM syndrome differentiation treatment;	Yaosheng Zhang, Jianwei Shang	TCM	TCM	Antipyretic time	zysjsgzs@163.com	+86 18134048843	Dongzhimen Hospital Affiliated to Beijing University of Chinese Medicine	Parallel	Novel Coronavirus Pneumonia (COVID-19)	Interventional	17 February 2020	Inclusion	Unconventional medicine	TCM (NS)			Dongzhimen Hospital Affiliated to Beijing University of Chinese Medicine	20200213	4/7/2020 10:40:56 AM	No	18	80
ChiCTR2000029769	263	161	http://www.chictr.org.cn/showproj.aspx?proj=49415	Inclusion	1		TCM	UCM	Asia	China	40	Adults	All	N/A	Not specified		0		0	Hospitalised/Severe/ICU	Not Recruiting	2020-02-13	ChiCTR	Babaodan Capsule used for the adjuvant treatment of severe novel coronavirus pneumonia (COVID-19)	Babaodan Capsule used for the adjuvant t	Severe	Experimental group:Routine treatment + Babaodan 6 capsules, bid orally;Control group:Conventional treatment;	Lv Dongqing	TCM	TCM	28-day survival	lvdq@enzemed.com	+86 13867622009	Enze Hospital of Taizhou Enze Medical Center (Group)	Parallel	novel coronavirus pneumonia (COVID-19)	Interventional	17 February 2020	Inclusion	Unconventional medicine	TCM (Ba-Bao-Dan)			Enze Hospital of Taizhou Enze Medical Center (Group)	20200213	4/7/2020 10:40:56 AM	No	18	80
ChiCTR2000029765	264	162	http://www.chictr.org.cn/showproj.aspx?proj=49409	Inclusion	1		Tocilizumab	Anti-IL-6	Asia	China	188	Adults	All	1	Not specified		1	1	1	Hospitalised/Severe/ICU	Recruiting	2020-02-13	ChiCTR	A multicenter, randomized controlled trial for the efficacy and safety of tocilizumab in the treatment of new coronavirus pneumonia (COVID-19)	A multicenter, randomized controlled tri	Severe	control group:conventional therapy;Experience group:conventional therapy+tocilizumab;	Xiaoling Xu	IT	tocilizumab	Cure rate	xxlahh08@163.com	+86 18963789002	The First Affiliated Hospital of University of science and technology of China (Anhui Provincial Hospital)	Parallel	new coronavirus pneumonia	Interventional	17 February 2020	Inclusion	Immunotherapy	Tocilizumab			The First Affiliated Hospital of University of science and technology of China (Anhui Provincial Hospital)	20200213	4/7/2020 10:40:56 AM	No	18	85
ChiCTR2000029763	265	163	http://www.chictr.org.cn/showproj.aspx?proj=49408	Inclusion	1		TCM	UCM	Asia	China	408	Adults	All	N/A	Open label		0		0	Hospitalised/Severe/ICU	Recruiting	2020-02-12	ChiCTR	The efficacy of traditional chinese medicine on Novel Coronavirus Pneumonia (COVID-19) patients treated in square cabin hospital: a prospective, randomized controlled trial	The efficacy of traditional chinese medi	Hospitalised	experimental group:TCM and general treatment;control group:general treatment;	Huang Luqi; Li Zhiqiang	TCM	TCM	Conversion to severe illness	huangluqi01@126.com	+86 010-64089801	China Academy of Chinese Medical Sciences	Parallel	novel coronavirus pneumonia (COVID-19)	Interventional	17 February 2020	Inclusion	Unconventional medicine	TCM (NS)			China Academy of Chinese Medical Sciences; Zhongnan Hospital of Wuhan University	20200212	4/7/2020 10:40:56 AM	No	18	75
ChiCTR2000029656	266	164	http://www.chictr.org.cn/showproj.aspx?proj=49086	Inclusion	1		Glucocorticoid	Glucocorticoid	Asia	China	100	Adults	All	N/A	Open label		0		0	Hospitalised/Severe/ICU	Not Recruiting	2020-02-09	ChiCTR	A randomized, open-label study to evaluate the efficacy and safety of low-dose corticosteroids in hospitalized patients with novel coronavirus pneumonia (COVID-19)	A randomized, open-label study to evalua	Hospitalised	control group:Standard treatment;experimental group:Standard treatment and methylprednisolone for injection;	Ronghui Du	AI	methylprednisolone	ECG	bluesearh006@sina.com	+86 15337110926	Wuhan Pulmonary Hospital	Parallel	novel coronavirus pneumonia (COVID-19)	Interventional	17 February 2020	Inclusion	Antiinflammatory	Methylprednisolone			Wuhan Pulmonary Hosptial	20200209	4/7/2020 10:40:56 AM	No	18
ChiCTR2000029768	267	165	http://www.chictr.org.cn/showproj.aspx?proj=49131	Inclusion	1		TCM	UCM	Asia	China	60	Adults	All	N/A	Open label		0		0	Diagnosed/suspected COVID	Recruiting	2020-02-13	ChiCTR	A randomized, open, controlled trial for diammonium glycyrrhizinate enteric-coated capsules combined with vitamin C tablets in the treatment of common novel coronavirus pneumonia (COVID-19) in the basic of clinical standard antiviral treatment to evaluate the safety and efficiency	A randomized, open, controlled trial for	Pneumonia	experimental group:Diammonium Glycyrrhizinate Enteric-coated Capsules (oral, 150mg, Tid), Vitamin C tablets (oral, 0.5g, QD) and clinical standard antiviral treatment;control group:clinical standard antiviral treatment;	Jun Lin	TCM	TCM	Time to improvement	wdznyy@126.com	+86 13971156723	Zhongnan Hospital of Wuhan University	Parallel	Novel Coronavirus Pneumonia (COVID-19)	Interventional	17 February 2020	Inclusion	Unconventional medicine	Diammonium Glycyrrhizinate Enteric-coated Capsules+Vitamin C			Zhongnan Hospital of Wuhan University	20200213	4/7/2020 10:40:56 AM	No	18	75
ChiCTR2000029756	268	166	http://www.chictr.org.cn/showproj.aspx?proj=49222	Inclusion	1		TCM	UCM	Asia	China	238	Adults	All	N/A	Open label		0		0	Diagnosed/suspected COVID	Recruiting	2020-02-12	ChiCTR	Clinical study of nebulized Xiyanping injection in the treatment of novel coronavirus pneumonia (COVID-19)	Clinical study of nebulized Xiyanping in	Pneumonia	experimental group:Xiyanping injection;control group:alpha-interferon;	Zhan Zhang	TCM	TCM	Vital signs	doctorzhang2003@163.com	+86 18062567610	Renmin Hospital of Wuhan University	Parallel	novel coronavirus pneumonia (COVID-19)	Interventional	17 February 2020	Inclusion	Unconventional medicine/Immunotherapy	Xiyanping injection/Alpha-interferon			Renmin Hospital of Wuhan University	20200212	4/7/2020 10:40:56 AM	No	18	60
ChiCTR2000029742	269	167	http://www.chictr.org.cn/showproj.aspx?proj=49297	Inclusion	1		TCM	UCM	Asia	China	90	Adults	All	1	Not specified		0		0	Diagnosed/suspected COVID	Recruiting	2020-02-11	ChiCTR	A randomized, parallel controlled trial for the efficacy and safety of Sodium Aescinate Injection in the treatment of patients with pneumonia (COVID-19)	A randomized, parallel controlled trial	Pneumonia	General patients treated with normal treatment:Normal Treatment;General patients experimental group:Normal Treatment plus Sodium Aescinate for Injection;Severe patients control group 1:Normal treatment plus hormonotherapy;Severe patients control group 2:Normal Treatment;Severe patients experimental group:Normal Treatment plus Sodium Aescinate for Injection;	Qin Ning, Meifang Han	TCM	TCM	Chest imaging (CT)	31531955@qq.com	+86 27 83662688	Tongji Hospital, Tongji Medical College, Huazhong University of Science and Technology	Parallel	Novel Coronavirus Pneumonia (COVID-19)	Interventional	17 February 2020	Inclusion	Adjunct therapy	Sodium Aescinate			Tongji Hospital,Tongji Medical College, Huazhong University of Science and Technology	20200211	4/7/2020 10:40:56 AM	No	18	70
ChiCTR2000029741	270	168	http://www.chictr.org.cn/showproj.aspx?proj=49263	Inclusion	1		Chloroquine + other	Antimalaria_antiviral/antibiotic	Asia	China	112	N/A	All	1	Open label		1	1	1	Mild/moderate	Recruiting	2020-02-11	ChiCTR	Efficacy of Chloroquine and Lopinavir/ Ritonavir in mild/general novel coronavirus (CoVID-19) infections: a prospective, open-label, multicenter randomized controlled clinical study	Efficacy of Chloroquine and Lopinavir/ R	Mild	experimental group:Chloroquine Phosphate;control group:Lopinavir / Ritonavir;	Xia Jinyu	AM/AV	Chloroquine/Lopinavir/ Ritonavir	Length of stay	xiajinyu@mail.sysu.edu.cn	+86 13823078064	The Fifth Affiliated Hospital Sun Yat-Sen University	Parallel	2019 Novel Coronavirus Infection (CoVID-19)	Interventional	17 February 2020	Inclusion	Anti malaria/AV	Chloroquine/Lopinavir+Ritonavir			The Fifth Affiliated Hospital Sun Yat-Sen University	20200211	4/7/2020 10:40:56 AM	No
ChiCTR2000029747	271	169	http://www.chictr.org.cn/showproj.aspx?proj=49287	Inclusion	1		TCM	UCM	Asia	China	200	Both	All	N/A	Open label		0		1	Diagnosed/suspected COVID	Recruiting	2020-02-11	ChiCTR	Effect evaluation and prognosis of Chinese medicine based on Novel Coronavirus Pneumonia (COVID-19)	Effect evaluation and prognosis of Chine	Confirmed	Experimental group:Traditional Chinese Medicine;control group:Basic treatment of modern medicine;	Nianzhi Zhang	TCM	TCM	Chest CT response	13505615645@163.com	+86 13505615645	The First Affiliated Hospital of Anhui University of Traditional Chinese Medicine	Parallel	Novel Coronavirus Pneumonia (COVID-19)	Interventional	17 February 2020	Inclusion	Unconventional medicine	TCM (NS)			The First Affiliated Hospital of Anhui University of Traditional Chinese Medicine	20200211	4/7/2020 10:40:56 AM	No	12	80
ChiCTR2000029739	272	170	http://www.chictr.org.cn/showproj.aspx?proj=49283	Inclusion	1		Hydrogen-Oxygen Nebulizer/Oxygen concentrator	Respiratory adjuncts (ventilator / gas)	Asia	China	440	Adults	All	N/A	Not specified		0		1	Hospitalised/Severe/ICU	Recruiting	2020-02-11	ChiCTR	A Multicenter, Randomized, Parallel Controlled Clinical Study of Hydrogen-Oxygen Nebulizer to Improve the Symptoms of Patients With Novel Coronavirus Pneumonia (COVID-19)	A Multicenter, Randomized, Parallel Cont	Severe	Experimental group:Hydrogen-Oxygen Nebulizer;Control group:Oxygen concentrator;	Nanshan Zhong, Zeguang Zheng	AT	Hydrogen-Oxygen Nebulizer/Oxygen concentrator	Worsened clinical condition	zheng862080@139.com	+86 18928868242	The First Affiliated Hospital of Guangzhou Medical University	Parallel	Novel Coronavirus Pneumonia (COVID-19)	Interventional	17 February 2020	Inclusion	Adjunct therapy	Hydrogen-Oxygen Nebulizer			The First Affiliated Hospital of Guangzhou Medical University	20200211	4/7/2020 10:40:56 AM	No	18	85
ChiCTR2000029601	276	171	http://www.chictr.org.cn/showproj.aspx?proj=48988	Inclusion	1		TCM	UCM	Asia	China	400	Adults	All	N/A	Open label		0		0	Diagnosed/suspected COVID	Recruiting	2020-02-06	ChiCTR	Community based prevention and control for Chinese medicine in the treatment of novel coronavirus pneumonia (COVID-19) in the isolate suspected and confirmed population	Community based prevention and control f	Pneumonia	Control group:Health education+Basic treatment of western medicine;Experimental group:Health education+Basic treatment of Western medicine+Dialectical?treatment of traditional Chinese medicine;	Tong Xiaolin	TCM	TCM	Virus negative conversion ratio	252417083@qq.com	+86 18908628577	Hubei Provincial Hospital of TCM	Parallel	novel coronavirus pneumonia (COVID-19)	Interventional	17 February 2020	Inclusion	Unconventional medicine	TCM (Dialectical)			Hubei Provincial Hospital of TCM	20200206	4/7/2020 10:40:56 AM	No	18	65
ChiCTR2000029569	277	172	http://www.chictr.org.cn/showproj.aspx?proj=49062	Inclusion	1		Stem Cells	Stem cells	Asia	China	30	Adults	All	N/A	Open label		0		0	Hospitalised/Severe/ICU	Not Recruiting	2020-02-04	ChiCTR	Safety and efficacy of umbilical cord blood mononuclear cells conditioned medium in the treatment of severe and critically novel coronavirus pneumonia (COVID-19): a randomized controlled trial	Safety and efficacy of umbilical cord bl	Severe	control group :Conventional treatment ;Experimental group :conventional treatment combined with umbilical cord mesenchymal stem cell conditioned medium group;	Pei Bin	SC	Stem Cells	PSI	xyxzyxzh@163.com	+86 18995678520	Xiangyang 1st People's Hospital	Parallel	novel coronavirus pneumonia (COVID-19)	Interventional	17 February 2020	Inclusion	Stem Cells	UC-MSC			Xiangyang 1st People's Hospital	20200204	4/7/2020 10:40:56 AM	No	18
ChiCTR2000029602	278	173	http://www.chictr.org.cn/showproj.aspx?proj=48985	Inclusion	1		TCM	UCM	Asia	China	600	Adults	All	N/A	Open label		0		0	Prevention	Recruiting	2020-02-06	ChiCTR	Clinical study for community based prevention and control strategy of novel coronavirus pneumonia (COVID-19) in the isolate suspected and confirmed population	Clinical study for community based preve	Prevention	Experimental group:health education, follow-up condition management by team of family doctors, Chinese medicine treatment;Control group:health education, follow-up condition management by team of family doctors;	Xiaolin Tong	TCM	TCM	Incidence COVID-19 at home	Xiaolintong66@sina.com	+86 13910662116	Hubei Provincial Hospital of TCM	Parallel	Novel Coronavirus Pneumonia (COVID-19)	Interventional	17 February 2020	Inclusion	Community				Hubei Provincial Hospital of TCM	20200206	4/7/2020 10:40:56 AM	No	18	65
ChiCTR2000029606	281	174	http://www.chictr.org.cn/showproj.aspx?proj=49146	Inclusion	1		Stem Cells	Stem cells	Asia	China	63	Both	All	N/A	Open label	1	0	1	0	Diagnosed/suspected COVID	Recruiting	2020-02-07	ChiCTR	Clinical Study for Human Menstrual Blood-Derived Stem Cells in the Treatment of Acute Novel Coronavirus Pneumonia (COVID-19)	Clinical Study for Human Menstrual Blood	Confirmed	experimental group A:Conventional treatment followed by Intravenous infusion of Human Menstrual Blood-derived Stem Cells preparations;control gorup A:Conventional treatment;Experimental Group B1:Artificial liver therapy+conventional treatment;Experimental Group B2:Artificial liver therapy followed by Intravenous infusion of Human Menstrual Blood-derived Stem Cells preparations+conventional treatm…	Lanjuan Li /Xiaowei Xu/Charile Xiang	SC	Stem Cells	Mortality	ljli@zju.edu.cn	+86 0571-87236426	The First Affiliated Hospital, College of Medicine, Zhejiang University	Parallel	Novel Coronavirus Pneumonia (COVID-19)	Interventional	17 February 2020	Inclusion	Stem Cells	Human Menstrual Blood-derived Stem Cells			The First Affiliated Hospital, College of Medicine, Zhejiang University	20200207	4/7/2020 10:40:56 AM	No	1	99
ChiCTR2000029539	283	175	http://www.chictr.org.cn/showproj.aspx?proj=48991	Inclusion	1		Ritonavir/Lopinavir	Antiviral	Asia	China	328	Adults	All	N/A	Open label		0		0	Diagnosed/suspected COVID	Recruiting	2020-02-03	ChiCTR	A randomized, open-label study to evaluate the efficacy and safety of Lopinavir-Ritonavir in patients with mild novel coronavirus pneumonia (COVID-19)	A randomized, open-label study to evalua	Pneumonia	experimental group:conventional standardized treatment and Lopinavir-Ritonavir;control group:Conventional standardized treatment;	Jianping Zhao	AV	Ritonavir/Lopinavir	14 days adverse respiratory event	zhaojp@tjh.tjmu.edu.cn	+86 13507138234	Tongji Hospital, Tongji Medical College, Huazhong University of Science and Technology	Parallel	novel coronavirus pneumonia (COVID-19)	Interventional	17 February 2020	Inclusion	AV	Lopinavir+Ritonavir			Tongji Hospital, Tongji Medical College, Huazhong University of Science and Technology	20200203	4/7/2020 10:40:56 AM	No	18
ChiCTR2000029572	284	176	http://www.chictr.org.cn/showproj.aspx?proj=41760	Inclusion	1		Stem Cells	Stem cells	Asia	China	30	Adults	All	N/A	Single blind		1	1	0	Hospitalised/Severe/ICU	Recruiting	2020-02-05	ChiCTR	Safety and efficacy of umbilical cord blood mononuclear cells in the treatment of severe and critically novel coronavirus pneumonia(COVID-19): a randomized controlled clinical trial	Safety and efficacy of umbilical cord bl	Severe	control group:Conventional treatment;experimental group:conventional treatment combined with umbilical cord blood mononuclear cells group;	Pei Bei	SC	Stem Cells	PSI	xyxzyxzh@163.com	+86 18995678520	Xiangyang First People's Hospital	Parallel	novel coronavirus pneumonia (COVID-19)	Interventional	17 February 2020	Inclusion	Stem Cells	UC-MSC			Xiangyang First People's Hospital	20200205	4/7/2020 10:40:56 AM	No	18
ChiCTR2000029559	285	177	http://www.chictr.org.cn/showproj.aspx?proj=48880	Inclusion	1		Chloroquine	Antimalaria	Asia	China	300	Adults	All	1	Double blind		0		0	Diagnosed/suspected COVID	Recruiting	2020-02-04	ChiCTR	Therapeutic effect of hydroxychloroquine on novel coronavirus pneumonia (COVID-19)	Therapeutic effect of hydroxychloroquine	Pneumonia	experimental group 1:Hydroxychloroquine 0.1 oral 2/ day;experimental group 2:Hydroxychloroquine 0.2 oral 2/ day;Placebo control group:Starch pill oral 2/ day;	Zhang Zhan	AM	Chloroquine	Time to negative COVID-19 nucleic acid	doctorzhang2003@163.com	+86 18962567610	Renmin Hospital of Wuhan University	Parallel	novel coronavirus pneumonia (COVID-19)	Interventional	17 February 2020	Inclusion	Anti malaria	Hydroxychloroquine			Renmin Hospital of Wuhan University	20200204	4/7/2020 10:40:56 AM	No	30	65
ChiCTR2000029605	286	178	http://www.chictr.org.cn/showproj.aspx?proj=49051	Inclusion	1		TCM	UCM	Asia	China	400	Adults	All	1	Open label		0		1	Diagnosed/suspected COVID	Recruiting	2020-02-07	ChiCTR	A randomized, open-label, blank-controlled, multicenter trial for Shuang-Huang-Lian oral solution in the treatment of ovel coronavirus pneumonia (COVID-19)	A randomized, open-label, blank-controll	Pneumonia	Low dose group:Shuanghuanglian 2 bottles/time, 3 times a day; Routine treatment.;Medium dose of group:Shuanghuanglian 4 bottles/time, 3 times a day; routine treatment.;High dose of group:Shuanghuanglian 6 bottles/time, 3 times a day; routine treatment.;Control group:Routine treatment;	Wang Daowen, Zhao Jianping	TCM	TCM	Time to recovery	dwwang@tjh.tjmu.edu.cn	+86 13971301060	Department of Cardiovascular Medicine, Tongji Hospital	Parallel	novel coronavirus pneumonia (NCP)	Interventional	17 February 2020	Inclusion	Unconventional medicine	TCM (Shuang-Huang-Lian solution)			Tongji Hospital, Tongji Medical College, Huazhong University of Science and Technology	20200207	4/7/2020 10:40:56 AM	No	18
ChiCTR2000029544	288	179	http://www.chictr.org.cn/showproj.aspx?proj=49013	inclusion	1		Favipiravir/Baloxavir Marboxil	Antiviral	Asia	China	30	Adults	All	N/A	Not specified		1	1	0	Diagnosed/suspected COVID	Not Recruiting	2020-02-03	ChiCTR	A randomized controlled trial for the efficacy and safety of Baloxavir Marboxil, Favipiravir tablets in novel coronavirus pneumonia (COVID-19) patients who are still positive on virus detection under the current antiviral therapy	A randomized controlled trial for the ef	Confirmed	Experimental group 1:current antiviral treatment+Baloxavir Marboxil tablets;Experimental group 2:current antiviral treatment+fabiravir tablets;Control group:current antiviral treatment;	Qiu Yunqing	AV	Favipiravir/Baloxavir Marboxil	PCR viral negative	qiuyq@zju.edu.cn	+86 13588189339	The First Hospital Affiliated to Zhejiang University's Medical School	Parallel	novel coronavirus pneumonia (COVID-19)	Interventional	17 February 2020	Inclusion	AV	Baloxavir Marboxil/Favipiravir			The First Hospital Affiliated to Zhejiang University's Medical School	20200203	4/7/2020 10:40:56 AM	No	18	75
ChiCTR2000029541	289	180	http://www.chictr.org.cn/showproj.aspx?proj=48992	Inclusion	1		Ritonavir/Lopinavir/darunavir/cobicistat/thymosin-a1	Antiviral	Asia	China	100	Adults	All	N/A	Not specified		1	1	0	Hospitalised/Severe/ICU	Not Recruiting	2020-02-03	ChiCTR	A randomised, open, controlled trial for darunavir/cobicistat or Lopinavir/ritonavir combined with thymosin a1 in the treatment of novel coronavirus pneumonia (COVID-19)	A randomised, open, controlled trial for	Hospitalised	DRV/c group:DRV/c (800mg/150mg QD) + Conventional treatment containing thymosin (1.6 mg SC QOD) ;LPV/r group:LPV/r (400mg/100mg bid) + Conventional treatment containing thymosin (1.6 mg SC QOD);other group:Conventional treatment containing thymosin (1.6 mg SC QOD) ;	Wang Xinghuan/Ke Hengning	AV	Ritonavir/Lopinavir/darunavir/cobicistat/thymosin-a1	Time to RNA conversion	wangxinghuan@whu.edu.cn	+86 18971387168/+86 15729577635	Zhongnan Hospital of Wuhan University	Parallel	novel coronavirus pneumonia (COVID-19)	Interventional	17 February 2020	Inclusion	AV/Adjunct therapy	darunavir+cobicistat/Lopinavir+ritonavir+thymosin a1			Zhongnan Hospital of Wuhan University	20200203	4/7/2020 10:40:56 AM	No	18	65
ChiCTR2000029438	292	181	http://www.chictr.org.cn/showproj.aspx?proj=48911	Inclusion	1		TCM	UCM	Asia	China	100	N/A	All	1	Not specified		1	1	0	Hospitalised/Severe/ICU	Not Recruiting	2020-02-01	ChiCTR	A randomized controlled trial of integrated TCM and Western Medicine in the treatment of severe novel coronavirus pneumonia (COVID-19)	A randomized controlled trial of integra	Severe	control group:western medical therapies;Experimental group:Conventional medicine + TCM;	LIU QINGQUAN, MIAO QING, ZHANG BOLI	TCM	TCM	CURB-65	ZJHTCM@FOXMAIL.COM	+86 13902020873	Beijing Hospital of Traditional Chinese Medicine affiliated to Capital Medical University/Beijing institute of Traditional Chinese Medicine	Parallel	novel coronavirus pneumonia (COVID-19)	Interventional	17 February 2020	Inclusion	Unconventional medicine	TCM (NS)			Beijing hospital of Traditional Chinese medicine; Hubei integrated traditional Chinese and Western Medicine Hospital	20200201	4/7/2020 10:40:56 AM	No
ChiCTR2000029548	295	182	http://www.chictr.org.cn/showproj.aspx?proj=49015	inclusion	1		Ritonavir/Lopinavir/Favipiravir/Baloxavir Marboxil	Antiviral	Asia	China	30	Adults	All	N/A	Open label		1	1	0	Diagnosed/suspected COVID	Not Recruiting	2020-02-04	ChiCTR	Randomized, open-label, controlled trial for evaluating of the efficacy and safety of Baloxavir Marboxil, Favipiravir, and Lopinavir-Ritonavir in the treatment of novel coronavirus pneumonia (COVID-19) patients	Randomized, open-label, controlled trial	Confirmed	A:BaloxavirMarboxil:80mg on day1,80mg on day4;and 80mg on day7 as neccessary. No more than 3 times administration in total.BaloxavirMarboxil:80mg on day1,80mg on day4;and 80mg on day7 as neccessary. No more than 3 times administration in total.;B:Favipiravir: 600 mg tid with 1600mg first loading dosage for no more than 14 days.;C:Lopinavir-Ritonavir: 2# (200mg/50 mg), twice daily, for 14days.;	Yunqing Qiu	AV	Ritonavir/Lopinavir/Favipiravir/Baloxavir Marboxil	PCR viral negative	qiuyq@zju.edu.cn	+86 13588189339	The First Affiliated Hospital, Zhejiang University School of Medicine	Parallel	novel coronavirus pneumonia (COVID-19)	Interventional	17 February 2020	Inclusion	AV	Baloxavir Marboxil/Favipiravir/Lopinavir+Ritonavir			The First Affiliated Hospital, Zhejiang University School of Medicine	20200204	4/7/2020 10:40:56 AM	No	18	75
ChiCTR2000029518	296	183	http://www.chictr.org.cn/showproj.aspx?proj=48860	Inclusion	1		TCM	UCM	Asia	China	140	Both	All	N/A	Double blind	1	0	1	0	Mild/moderate	Recruiting	2020-02-03	ChiCTR	Chinese medicine prevention and treatment program for novel coronavirus pneumonia (COVID-19): a perspective, double-blind, placebo, randomised controlled trial	Chinese medicine prevention and treatmen	Mild	(ordinary) Western medicine group:Use the (ordinary) western medicine treatment plan in "the diagnosis and treatment plan of new coronavirus infection pneumonia" issued by the National Health Commission of the fourth edition.;(ordinary) Chinese and Western Medicine Group:Use the (ordinary) TCM clinical prescription combined with the western medicine treatment plan in "the diagnosis and treatment …	Wen Chengping	TCM	TCM	Ratio and time of severe progression to critical or even death	wengcp@163.com	+86 13906514781	Zhejiang Chinese Medical University	Parallel	novel coronavirus pneumonia (COVID-19)	Interventional	17 February 2020	Inclusion	Unconventional medicine	TCM (NS)			Zhejiang Chinese Medical University	20200203	4/7/2020 10:40:56 AM	No	14	80
ChiCTR2000029517	297	184	http://www.chictr.org.cn/showproj.aspx?proj=48861	Inclusion	1		TCM	UCM	Asia	China	100	Both	All	N/A	Double blind		0		0	Diagnosed/suspected COVID	Recruiting	2020-02-03	ChiCTR	Chinese medicine prevention and treatment program for suspected novel coronavirus pneumonia (COVID-19): a perspective, double-blind, placebo, randomised controlled trial	Chinese medicine prevention and treatmen	Confirmed	treament group:Chinese medicine decoction;placebo group:placebo;	Chengping Wen	TCM	TCM	Relief of clinical symptoms and duration	wengcp@163.com	+86 13601331063	Zhejiang Chinese Medical University	Parallel	novel coronavirus pneumonia (COVID-19)	Interventional	17 February 2020	Inclusion	Unconventional medicine	TCM (NS)			Zhejiang Chinese Medical University	20200203	4/7/2020 10:40:56 AM	No	14	80
ChiCTR2000029435	298	185	http://www.chictr.org.cn/showproj.aspx?proj=48827	Inclusion	1		TCM	UCM	Asia	China	120	Adults	All	N/A	Open label		0		0	Prevention	Not Recruiting	2020-02-01	ChiCTR	Randomized controlled trial for traditional Chinese medicine in the prevention of novel coronavirus pneumonia (COVID-19) in high risk population	Randomized controlled trial for traditio	Prevention	Community exposure TCM intervention group:TCM intervention;Community exposure control group:Placebo;Hospital exposure TCM intervention group:TCM intervention;Hospital exposure control group:Placebo;Community suspected TCM intervention group:TCM intervention;Community suspected control group:Placebo;Hospital suspected TCM intervention group:TCM intervention;Hospital suspected control group:Placebo;	Wei Li	TCM	TCM	Viral nucleic acid detection	whsdyyykjc@126.com	+86 13163283819	Wuhan 1st Hospital	Parallel	novel coronavirus pneumonia (COVID-19)	Interventional	17 February 2020	Exclusion	Prevention				Wuhan 1st Hospital	20200201	4/7/2020 10:40:56 AM	No	18	60
ChiCTR2000029461	299	186	http://www.chictr.org.cn/showproj.aspx?proj=48927	Inclusion	1		TCM	UCM	Asia	China	100	Adults	All	N/A	Open label		0		0	Diagnosed/suspected COVID	Not Recruiting	2020-02-02	ChiCTR	A Randomized Controlled Trial for Integrated Traditional Chinese Medicine and Western Medicine in the Treatment of Common Type Novel Coronavirus Pneumonia (COVID-19)	A Randomized Controlled Trial for Integr	Pneumonia	experimental group:TCM decoctions+basic conventional therapy;Control group:basic conventional therapies;	Wenguang Xia	TCM	TCM	pulmonary function	docxwg@163.com	+86 13377897278	1. Xinhua affiliated hospital, Hubei University of Chinese Medicine; 2. Hubei Provincial Hospital of Integrated Chinese and Western Medicine	Parallel	Novel Coronavirus Pneumonia (COVID-19)	Interventional	17 February 2020	Inclusion	Unconventional medicine	TCM (NS)			1. Xinhua affiliated hospital, Hubei University of Chinese Medicine; 2. Hubei Provincial Hospital of Integrated Chinese and Western Medicine	20200202	4/7/2020 10:40:56 AM	No	18	70
ChiCTR2000029418	302	187	http://www.chictr.org.cn/showproj.aspx?proj=48886	Inclusion	1		TCM	UCM	Asia	China	42	Adults	All	N/A	Open label		0		0	Hospitalised/Severe/ICU	Recruiting	2020-01-30	ChiCTR	Chinese Herbal medicine for Severe nevel coronavirus pneumonia (COVID-19): a Randomized Controlled Trial	Chinese Herbal medicine for Severe nevel	Severe	Experimental Group:Combined Treatment of Chinese medicine and western medicine;Control Group:Western medicine treatment;	Tengxiao Liang, Tong Wang, Xuezeng Hao, Jingfeng Zhang, Yaosheng Zhang	TCM	TCM	Critically ill patients	shanghongcai@126.com	+86 010 84012510	Dongzhimen Hospital Affiliated to Beijing University of Chinese Medicine	Parallel	novel coronavirus pneumonia (COVID-19)	Interventional	17 February 2020	Inclusion	Unconventional medicine	TCM (NS)			Dongzhimen Hospital Affiliated to Beijing University of Chinese Medicine	20200130	4/7/2020 10:40:56 AM	No	18
ChiCTR2000029495	303	188	http://www.chictr.org.cn/showproj.aspx?proj=48971	Inclusion	1		TCM	UCM	Asia	China	90	Adults	All	N/A	Open label		0		0	Diagnosed/suspected COVID	Not Recruiting	2020-02-02	ChiCTR	Traditional Chinese Medicine, Psychological Intervention and Investigation of Mental Health for Patients With Novel Coronavirus Pneumonia (COVID-19) in Convalescent Period	Traditional Chinese Medicine, Psychologi	Rehabilitation	experimental group:Traditional Chinese Medicine+psychological intervention; Control group:Traditional Chinese Medicine;Control group:psychological intervention;	Min Huang	TCM	TCM	Self-rating depression scale	1025823309@qq.com	+86 13307161995	1. Xinhua affiliated hospital, Hubei University of Chinese Medicine; 2. Hubei Provincial Hospital of Integrated Chinese and Western Medicine	Parallel	novel coronavirus pneumonia (COVID-19)	Interventional	17 February 2020	Exclusion	Community				1. Xinhua Affiliated Hospital, Hubei University of Chinese Medicine; 2. Hubei Provincial Hospital of Integrated Chinese and Western Medicine	20200202	4/7/2020 10:40:56 AM	No	18	70
ChiCTR2000029493	304	189	http://www.chictr.org.cn/showproj.aspx?proj=48931	Inclusion	1		TCM	UCM	Asia	China	100	Adults	All	N/A	Open label		0		0	Diagnosed/suspected COVID	Not Recruiting	2020-02-02	ChiCTR	Traditional Chinese Medicine for Pulmonary Fibrosis, Pulmonary Function and Quality of Life in Patients With Novel Coronavirus Pneumonia (COVID-19) in Convalescent Period: a Randomized Controlled Trial	Traditional Chinese Medicine for Pulmona	Rehabilitation	experimental group :TCM decoctions+basic western medical therapies ;control group :basic western medical therapies ;	Jixian Zhang	TCM	TCM	pulmonary function	jxzhang1607@163.com	+86 13377897297	1. Xinhua affiliated hospital, Hubei University of Chinese Medicine; 2. Hubei Provincial Hospital of Integrated Chinese and Western Medicine	Parallel	novel coronavirus pneumonia (COVID-19)	Interventional	17 February 2020	Inclusion	Unconventional medicine	TCM (NS)			1. Xinhua affiliated hospital, Hubei University of Chinese Medicine; 2. Hubei Provincial Hospital of Integrated Chinese and Western Medicine	20200202	4/7/2020 10:40:56 AM	No	18	70
ChiCTR2000029439	306	190	http://www.chictr.org.cn/showproj.aspx?proj=48904	Inclusion	1		TCM	UCM	Asia	China	120	N/A	All	N/A	Open label		0		1	Diagnosed/suspected COVID	Not Recruiting	2020-02-01	ChiCTR	Combination of traditional Chinese medicine and western medicine in the treatment of common type novel coronavirus pneumonia (COVID-19)	Combination of traditional Chinese medic	Pneumonia	control group:basic western medical therapies;experimental group:TCM standard decoctions+basic western medical therapies;	WANG YUGUANG, LI XUCHENG, ZHANG BOLI	TCM	TCM	Antipyretic time	ZJHTCM@FOXMAIL.COM	+86 13902020873	Beijing Hospital of Traditional Chinese Medicine affiliated to Capital Medical University/Beijing institute of Traditional Chinese Medicine	Parallel	novel coronavirus pneumonia (COVID-19)	Interventional	17 February 2020	Inclusion	Unconventional medicine	TCM (NS)			Beijing Hospital of Traditional Chinese Medicine affiliated to Capital Medical University/Beijing institute of Traditional Chinese MedHubei integrated traditional Chinese and Western Medicine Hospital	20200201	4/7/2020 10:40:56 AM	No
ChiCTR2000029431	309	191	http://www.chictr.org.cn/showproj.aspx?proj=48907	Inclusion	1		M1 macrophages	Other immunotherapeutics	Asia	China	45	N/A	All	N/A	Open label		0		0	Hospitalised/Severe/ICU	Recruiting	2020-02-01	ChiCTR	Clinical study for the remedy of M1 macrophages target in the treatment of novel coronavirus pneumonia (COVID-19)	Clinical study for the remedy of M1 macr	Hospitalised	A:Critical Treatment in Critical Period + Ankylosaurus;B:Critical Treatment in Critical Period + Ankylosaurus+M1 suppression therapy;C:Critical Treatment in Critical Period;	Dewei Zhao	IT	M1 macrophages	CT of lung	zhaodewei2016@163.com	+86 0411-62893509	Affiliated Zhongshan Hospital of Dalian University	Parallel	novel coronavirus pneumonia (COVID-19)	Interventional	17 February 2020	Inclusion	Unconventional medicine/Immunotherapy	Ankylosaurus/Ankylosaurus+M1 suppression therapy			Affiliated Zhongshan Hospital of Dalian University	20200201	4/7/2020 10:40:56 AM	No
ChiCTR2000030179	311	192	http://www.chictr.org.cn/showproj.aspx?proj=50059	Inclusion	1		Convalescent Plasma	Antibodies	Asia	China	100	Adults	All	N/A	Open label	1	0	1	0	Diagnosed/suspected COVID	Recruiting	2020-02-24	ChiCTR	Experimental study of novel coronavirus pneumonia rehabilitation plasma therapy severe novel coronavirus pneumonia (COVID-19)	Experimental study of novel coronavirus	Rehabilitation	Experimental group:Routine treatment + plasma treatment;Control group:Routine treatment;	Le Aiping	IT	plasma	Mortality	leaiping@126.com	+86 13707089009	The First Affiliated Hospital of Nanchang University	Parallel	Novel Coronavirus Pneumonia (COVID-19)	Interventional	25 February 2020	Inclusion	Immunotherapy	Plasma treatment			The First Affiliated Hospital of Nanchang University	20200224	4/7/2020 10:40:56 AM	No	18	65
ChiCTR2000030173	312	193	http://www.chictr.org.cn/showproj.aspx?proj=49229	Inclusion	1		Stem Cells	Stem cells	Asia	China	60	Adults	All	N/A	Open label		0		0	Diagnosed/suspected COVID	Not Recruiting	2020-02-24	ChiCTR	Key techniques of umbilical cord mesenchymal stem cells for the treatment of novel coronavirus pneumonia (COVID-19) and clinical application demonstration	Key techniques of umbilical cord mesench	Confirmed	Experimental group:umbilical cord mesenchymal stem cells;control group:convention treatment;	Xue Zhigang	SC	Stem Cells	pulmonary function	xuezg@tongji.edu.cn	+86 15000285942	Hu'nan Yuanpin Cell Biotechnology Co., Ltd	Parallel	Novel Coronavirus Pneumonia (COVID-19)	Interventional	25 February 2020	Inclusion	Stem Cells	UC-MSC			Hunan yuanpin Cell Biotechnology Co., Ltd	20200224	4/7/2020 10:40:56 AM	No	18	70
ChiCTR2000030166	313	194	http://www.chictr.org.cn/showproj.aspx?proj=49696	Inclusion	1		TCM	UCM	Asia	China	20	Adults	All	N/A	Open label		0		0	Diagnosed/suspected COVID	Not Recruiting	2020-02-24	ChiCTR	Randomized, parallel control, open trial for Qing-Wen Bai-Du-Yin combined with antiviral therapy in the treatment of novel coronavirus pneumonia (COVID-19)	Randomized, parallel control, open trial	Confirmed	Control group:Routine treatment (Pure western medicine): Lopinavir-ritonavir tablet combined with recombinant human interferon alpha 2b injection;Investigation group:(Integrated Chinese and western medicine): Lopinavir-ritonavir tablet combined with recombinant human interferon alpha 2b injection(routine treatment)+Qing-Wen Bai-Du-Yin formula granules;	Yanling Zhao	TCM	TCM	CT scan of the lungs	zhaoyl2855@126.com	+86 13681208998	The 5th Medical Center Chinese PLA General Hospital	Parallel	Novel Coronavirus Pneumonia (COVID-19)	Interventional	25 February 2020	Inclusion	Unconventional medicine	TCM (Qing-Wen Bai-Du-Yin)			The 5th Medical Center Chinese PLA General Hospital	20200224	4/7/2020 10:40:56 AM	No	18
ChiCTR2000030188	314	195	http://www.chictr.org.cn/showproj.aspx?proj=50025	Inclusion	1		TCM	UCM	Asia	China	120	Adults	All	N/A	Open label		1	1	0	Hospitalised/Severe/ICU	Recruiting	2020-02-24	ChiCTR	Clinical Study on Syndrome Differentiation of TCM in Treating Severe and Critical novel coronavirus pneumonia (COVID-19)	Clinical Study on Syndrome Differentiati	Severe	Experimental group:Syndrome differential treatment of Chinese Medicine + Western medicine basic treatment;Control group:Western medicine basic treatment;	Donghui Huang	TCM	TCM	TCM symptom score	13600001163@139.com	+86 0756-3325892	Guangdong Provincial Hospital of Chinese Medicine - Zhuhai Hospital	Parallel	Novel Coronavirus Pneumonia (COVID-19)	Interventional	25 February 2020	Inclusion	Unconventional medicine	TCM (NS)			Guangdong Provincial Hospital of Chinese Medicine - Zhuhai Hospital	20200224	4/7/2020 10:40:56 AM	No	18
ChiCTR2000030167	316	196	http://www.chictr.org.cn/showproj.aspx?proj=49567	Inclusion	1		Interleukin-2	Other immunotherapeutics	Asia	China	80	Adults	All	N/A	Open label		0		0	Mild/moderate	Not Recruiting	2020-02-24	ChiCTR	Clinical Trial for Recombinant Human Interleukin-2 in the Treatment of Novel Coronavirus Pneumonia (COVID-19)	Clinical Trial for Recombinant Human Int	Mild	Experimental Group:Conventional Treatment & Low Dose Recombinant Human Interleukin-2, i.m.(1 million IU per time, once another day, 3 times per week, 2 weeks);Control Group:Conventional Treatment+Placebo i.m.(once another day, 3 times per week, 2 weeks);	Qianxue Chen	IT	Human Interleukin-2	CD8+ T cells numbers	chenqx666@whu.edu.cn	+86 027-88041911-82237	Renmin Hospital of Wuhan University	Parallel	Novel Coronavirus Pneumonia (COVID-19)	Interventional	25 February 2020	Inclusion	Immunotherapy	Low Dose Recombinant Human Interleukin-2			Renmin Hospital of Wuhan University	20200224	4/7/2020 10:40:56 AM	No	18	75
ChiCTR2000030113	318	197	http://www.chictr.org.cn/showproj.aspx?proj=49988	Inclusion	1		Favipiravir	Antiviral	Asia	China	30	Both	All	N/A	Open label		0		0	Diagnosed/suspected COVID	Recruiting	2020-02-23	ChiCTR	Randomized controlled trial for safety and efficacy of Favipiravir in the treatment of novel coronavirus pneumonia (COVID-19) with poorly responsive ritonavir/ritonavir	Randomized controlled trial for safety a	Confirmed	Control group:Keep ritonavir/ritonavir treatment;Experimental group:Favipiravir;	Liu Yingxia	AV	Favipiravir	Blood routine tests	yingxialiu@hotmail.com	+86 755 61238922	Shenzhen the 3rd People's Hospital	Parallel	novel coronavirus pneumonia (COVID-19)	Interventional	25 February 2020	Inclusion	AV	Favipiravir/ritonavir			The Third People's Hospital of Shenzhen	20200223	4/7/2020 10:40:56 AM	No	16	75
ChiCTR2000030138	319	198	http://www.chictr.org.cn/showproj.aspx?proj=50004	Inclusion	1		Stem Cells	Stem cells	Asia	China	60	Both	Male	1	Double blind		0		0	Hospitalised/Severe/ICU	Not Recruiting	2020-02-24	ChiCTR	Clinical Trial for Human Mesenchymal Stem Cells in the Treatment of Severe Novel Coronavirus Pneumonia (COVID-19)	Clinical Trial for Human Mesenchymal Ste	Severe	Experimental group:Intravenous injection of human umbilical cord mesenchymal stem cells (UC-MSC);Control group:Routine treatment + placebo;	Jian Bo and Chuanzhu Li	SC	Stem Cells	Clinical index	boj301@sina.com	+86 13801257802	Chinese PLA General Hospital	Parallel	Novel Coronavirus Pneumonia (COVID-19)	Interventional	25 February 2020	Inclusion	Stem Cells	UC-MSC			Chinese PLA General Hospital	20200224	4/7/2020 10:40:56 AM	No	16	75
ChiCTR2000030118	321	199	http://www.chictr.org.cn/showproj.aspx?proj=49594	Inclusion	1		TCM	UCM	Asia	China	120	N/A	All	N/A	Not specified		0		0	Diagnosed/suspected COVID	Not Recruiting	2020-02-23	ChiCTR	A clinical study for ''Huo-Shen'' particles in the treatment of novel coronavirus pneumonia (COVID-19)	A clinical study for ''Huo-Shen'' partic	Pneumonia	Experimental group:Traditional Chinese medicine soup;Control group:Western antiviral;	Yuan Yongming	TCM	TCM	Chest CT scan	64699629@qq.com	+86 18664556429	Shenzhen national medicine inheritance medical research institute co. LTD	Parallel	Novel Coronavirus Pneumonia (COVID-19)	Interventional	25 February 2020	Inclusion	Unconventional medicine/AV	TCM (Huo-Shen-soup)/Western AV			Shenzhen national medicine inheritance medical research institute co. LTD	20200223	4/7/2020 10:40:56 AM	No
ChiCTR2000030116	322	200	http://www.chictr.org.cn/showproj.aspx?proj=49901	Inclusion	1		Stem Cells	Stem cells	Asia	China	16	Adults	All	N/A	Not specified		0		0	Hospitalised/Severe/ICU	Recruiting	2020-02-23	ChiCTR	Safety and effectiveness of human umbilical cord mesenchymal stem cells in the treatment of acute respiratory distress syndrome of severe novel coronavirus pneumonia (COVID-19)	Safety and effectiveness of human umbili	Severe	Two groups:Different stem cell doses;	Zhang Wei	SC	Stem Cells	Time to leave ventilator	zhangweiliuxin@163.com	+86 13707089183	The First Affiliated Hospital of Nanchang University	Dose comparison	Novel Coronavirus Pneumonia (COVID-19)	Interventional	25 February 2020	Inclusion	Stem Cells	UC-MSC			The First Affiliated Hospital of Nanchang University	20200223	4/7/2020 10:40:56 AM	No	18	75
ChiCTR2000030102	327	201	http://www.chictr.org.cn/showproj.aspx?proj=49747	Inclusion	1		ozone autohemotherapy	Respiratory adjuncts (ventilator / gas)	Asia	China	180	Adults	All	N/A	Not specified		0		1	Diagnosed/suspected COVID	Recruiting	2020-02-23	ChiCTR	A multicenter randomized controlled trial for ozone autohemotherapy in the treatment of novel coronavirus pneumonia (COVID-19)	A multicenter randomized controlled tria	Pneumonia	control group with common NCP:conventional treatment;experimental group with common NCP:conventional treatment combined with ozone therapy;experimental group with severe NCP:conventional treatment combined with ozone therapy;control group with severe NCP:conventional treatment;experimental group with critical NCP:conventional treatment combined with ozone therapy;control group with critical NCP:c…	Xiaoguang Tong	AT	ozone autohemotherapy	Chest imaging	Tongxg@yahoo.com	+86 13820088121	Tianjin Huanhu Hospital	Parallel	Novel Coronavirus Pneumonia (COVID-19)	Interventional	25 February 2020	Inclusion	Immunotherapy	ozone autohemotherapy			Tianjin Huanhu Hospital	20200223	4/7/2020 10:40:56 AM	No	18	80
ChiCTR2000030058	328	202	http://www.chictr.org.cn/showproj.aspx?proj=49831	Inclusion	1		leflunomide	Antiinflammatory	Asia	China	200	Adults	All	1	Double blind		0		1	Diagnosed/suspected COVID	Not Recruiting	2020-02-22	ChiCTR	A multicenter, randomized, double-blind, controlled clinical trial for leflunomide in the treatment of novel coronavirus pneumonia (COVID-19)	A multicenter, randomized, double-blind,	Confirmed	Experimental group :Oral leflunomide;Control group:Oral placebo;	Ke Hu	AI	leflunomide	The days from positive to negative for viral nucleic acid testing	hukejx@163.com	+86 18971035988	Renmin Hospital of Wuhan University	Parallel	Novel Coronavirus Pneumonia (COVID-19)	Interventional	25 February 2020	Inclusion	Immunotherapy	Leflunomide			Renmin Hospital of Wuhan University	20200222	4/7/2020 10:40:56 AM	No	18	70
ChiCTR2000030043	329	203	http://www.chictr.org.cn/showproj.aspx?proj=49866	Inclusion	1		TCM	UCM	Asia	China	300	Adults	All	1	Not specified		1	1	1	Hospitalised/Severe/ICU	Not Recruiting	2020-02-21	ChiCTR	Shen-Fu injection in the treatment of severe novel coronavirus pneumonia (COVID-19): a multicenter, randomized, open-label, controlled trial	Shen-Fu injection in the treatment of se	Severe	Experimental:Conventional treatment and Shenfu injection;control:Conventional treatment;	Ma Penglin	TCM	TCM	pneumonia severity index	mapenglin1@163.com	+86 13810339898	Peking University Third Hospital	Parallel	Novel Coronavirus Pneumonia (COVID-19)	Interventional	25 February 2020	Inclusion	Unconventional medicine	TCM (Shen-Fu)			Peking University Third Hospital	20200221	4/7/2020 10:40:56 AM	No	18	75
ChiCTR2000030089	331	204	http://www.chictr.org.cn/showproj.aspx?proj=49889	Inclusion	1		Adalimumab	Other immunotherapeutics	Asia	China	60	N/A	All	1	Not specified		1	1	1	Hospitalised/Severe/ICU	Not Recruiting	2020-02-22	ChiCTR	A clinical study for the efficacy and safety of Adalimumab Injection in the treatment of patients with severe novel coronavirus pneumonia (COVID-19)	A clinical study for the efficacy and sa	Severe	Experimental group:Conventional treatent and adalimumab;Control group:conventional treatment ;	Huji Xu	IT	adalimumab	Time to Clinical Improvement	xuhuji@smmu.edu.cn	+86 13671609764	Shanghai Changzheng Hospital	Parallel	Novel Coronavirus Pneumonia(COVID-19)	Interventional	25 February 2020	Inclusion	Immunotherapy	Adalimumab			Shanghai Changzheng Hospital	20200222	4/7/2020 10:40:56 AM	No
ChiCTR2000030088	332	205	http://www.chictr.org.cn/showproj.aspx?proj=49902	Inclusion	1		Stem Cells	Stem cells	Asia	China	40	Adults	All	N/A	Not specified		0		1	Hospitalised/Severe/ICU	Not Recruiting	2020-02-22	ChiCTR	Umbilical cord Wharton's Jelly derived mesenchymal stem cells in the treatment of severe novel coronavirus pneumonia (COVID-19)	Umbilical cord Wharton's Jelly derived m	Severe	Experimental group:Iv injection of Wharton's Jelly mesenchymal stem cells (1×10^6/kg), cell suspension volume: 40ml;Control group:Iv 40ml saline;	Lianru Gao	SC	Stem Cells	The nucleic acid of the novel coronavirus is negative	lianru666@163.com	+86 18600310121	The Sixth Medical Center of PLA General Hospital	Parallel	Novel Coronavirus Pneumonia (COVID-19)	Interventional	25 February 2020	Inclusion	Stem Cells	Wharton's Jelly mesenchymal stem cells			The Sixth Medical Center of PLA General Hospital	20200222	4/7/2020 10:40:56 AM	No	18	80
ChiCTR2000030034	334	206	http://www.chictr.org.cn/showproj.aspx?proj=49647	Inclusion	1		TCM	UCM	Asia	China	132	Adults	All	N/A	Not specified		0		1	Diagnosed/suspected COVID	Recruiting	2020-02-21	ChiCTR	Traditional Chinese Medicine in the treatment of novel coronavirus pneumonia (COVID-19): a multicentre, randomized controlled trial	Traditional Chinese Medicine in the trea	Confirmed	Experimental group:TCM+Routine treatment of Western Medicine;Control group:Routine treatment of Western Medicine;	Kequn Chai	TCM	TCM	Body temperature	ckqmzygzs@163.com	+86 13906503739	Tongde Hospital of Zhejiang Province	Parallel	Novel Coronavirus Pneumonia (COVID-19)	Interventional	25 February 2020	Inclusion	Unconventional medicine	TCM (NS)			Tongde Hospital of Zhejiang Province	20200221	4/7/2020 10:40:56 AM	No	18	85
ChiCTR2000030033	335	207	http://www.chictr.org.cn/showproj.aspx?proj=49703	Inclusion	1		TCM	UCM	Asia	China	828	Adults	All	N/A	Open label		0		0	Prevention	Not Recruiting	2020-02-21	ChiCTR	A study for the intervention of Xiangxue antiviral oral solution and Wu-Zhi-Fang-Guan-Fang on close contacts of novel coronavirus pneumonia (COVID-19)	A study for the intervention of Xiangxue	Prevention	Intervention group 1:Oral antiviral oral solution (Xiangxue Pharmaceutical);Intervention group 2:Oral "Wu-Zhi-Fang-Guan-Fang" decoction;Control group:Routine quarantine measures;	Feng WANG	TCM	TCM	Proportion of COVID-19 close contacts who have developed as confirmed cases	412475734@qq.com	+86 13710801606	The First Affiliated Hospital of Guangzhou Medical University	Parallel	Novel Coronavirus Pneumonia (COVID-19)	Interventional	25 February 2020	Inclusion	Unconventional medicine	TCM (Wu-Zhi-Fang-Guan-Fang)			The First Affiliated Hospital of Guangzhou Medical University	20200221	4/7/2020 10:40:56 AM	No	18	80
ChiCTR2000030054	338	208	http://www.chictr.org.cn/showproj.aspx?proj=49869	inclusion	1		Chloroquine	Antimalaria	Asia	China	100	Adults	All	N/A	Not specified		0		0	Diagnosed/suspected COVID	Not Recruiting	2020-02-22	ChiCTR	A prospective, open label, randomized, control trial for chloroquine or hydroxychloroquine in patients with mild and common novel coronavirus pulmonary (COVIP-19)	A prospective, open label, randomized, c	Pneumonia	Hydroxychloroquine sulfate gloup:Hydroxychloroquine sulfate 0.2g bid x 14 days a day ;Chloroquine phosphate gloup:The first dose of chloroquine phosphate was 1gx2 days, and the third day was 0.5gx12 days ;Control group:Recommended treatment plan for novel coronavirus pneumonia diagnosis and treatment plan ;	Yin Zhenyu	AM	Chloroquine	Clinical recovery time	Yinzy@xmu.edu.cn	+86 13950120518	Zhongshan Hospital Affiliated to Xiamen University	Parallel	Novel Coronavirus Pneumonia (COVID-19)	Interventional	25 February 2020	Inclusion	Anti malaria	Hydroxychloroquine/Chloroquine			Zhongshan Hospital Affiliated to Xiamen University	20200222	4/7/2020 10:40:56 AM	No	18	75
ChiCTR2000030016	340	209	http://www.chictr.org.cn/showproj.aspx?proj=49799	Inclusion	1		Vaccine mycobacterium w	Vaccine	Asia	China	60	Adults	All	1	Double blind	1	0	1	0	Diagnosed/suspected COVID	Recruiting	2020-02-19	ChiCTR	Basic and clinical study of inhalation of inactivated mycobacterium vaccine in the treatment of Novel coronavirus pneumonia (COVID-19)	Basic and clinical study of inhalation o	Pneumonia	1:inhalate the mycobacterium vaccae for injection;2:inhalate Physiological saline;	Chaoqian Li	Other	inhalate the mycobacterium vaccae for injection	Mortality	2534776680@qq.com	+86 13807887867	Department of respiratory medicine, the First Affiliated Hospital of Guangxi Medical University	Parallel	Novel Coronavirus Pneumonia (COVID-19)	Interventional	25 February 2020	Exclusion	Vaccination				Guangxi medical uniwresity	20200219	4/7/2020 10:40:56 AM	No	18	80
ChiCTR2000030007	341	210	http://www.chictr.org.cn/showproj.aspx?proj=49619	Inclusion	1		Filgrastim (rhG-CSF)	Other immunotherapeutics	Asia	China	200	Both	All	N/A	Not specified		0		1	Diagnosed/suspected COVID	Not Recruiting	2020-02-19	ChiCTR	Multicenter randomized controlled trial for rhG-CSF in the treatment of novel coronavirus pneumonia (COVID-19)	Multicenter randomized controlled trial	Confirmed	Experimental group:rhG-CSF, 5ug/kg, combinated with standard treatment;Control group:standard treatment;	Nanshan Zhong	IT	Filgrastim (rhG-CSF)	Clinical symptoms	linling@gird.cn	+86 13902233092	The First Affiliated Hospital of Guangzhou Medical University	Parallel	Novel Coronavirus Pneumonia (COVID-19)	Interventional	25 February 2020	Inclusion	Immunotherapy	rhG-CSF			The First Affiliated Hospital of Guangzhou Medical University	20200219	4/7/2020 10:40:56 AM	No	15	80
ChiCTR2000030010	342	211	http://www.chictr.org.cn/showproj.aspx?proj=49777	Inclusion	1		Convalescent Plasma	Antibodies	Asia	China	100	Adults	All	N/A	Double blind		1	1	0	Hospitalised/Severe/ICU	Not Recruiting	2020-02-19	ChiCTR	A randomized, double-blind, parallel-controlled, trial to evaluate the efficacy and safety of anti-SARS-CoV-2 virus inactivated plasma in the treatment of severe novel coronavirus pneumonia patients (COVID-19)	A randomized, double-blind, parallel-con	Severe	Experimental group:Anti-SARS-CoV-2 virus inactivated plasma;Control group:Ordinary plasma;	Zhang Dingyu	IT	Plasma	Improvement of clinical symptom	1813886398@qq.com	+86 13507117929	Wuhan Jinyintan Hospital (Wuhan Infectious Diseases Hospital)	Parallel	Novel Coronavirus Pneumonia (COVID-19)	Interventional	25 February 2020	Inclusion	Immunotherapy	Anti-SARS-CoV-2 virus inactivated plasma/Ordinary plasma			Wuhan Jinyintan Hospital (Wuhan Infectious Diseases Hospital)	20200219	4/7/2020 10:40:56 AM	No	18	70
ChiCTR2000030006	343	212	http://www.chictr.org.cn/showproj.aspx?proj=49737	Inclusion	1		ozone autohemotherapy	Respiratory adjuncts (ventilator / gas)	Asia	China	60	N/A	All	N/A	Single blind		1	1	0	Hospitalised/Severe/ICU	Recruiting	2020-02-19	ChiCTR	A randomized controlled trial for the efficacy of ozonated autohemotherapy in the treatment of Novel Coronavirus Pneumonia (COVID-19)	A randomized controlled trial for the ef	Hospitalised	Experimental group:ozonated autohemotherapy;Control group:Standard medical treatment;	Chen Xiangdong	AT	ozone autohemotherapy	Recovery rate	xiangdongchen2013@163.com	+86 15071096621	Union Hospital, Tongji Medical College, Huazhong University of Science and Technology	Parallel	Novel Coronavirus Pneumonia (COVID-19)	Interventional	25 February 2020	Inclusion	Immunotherapy	ozonated autohemotherapy			Union Hospital, Tongji Medical College, Huazhong University of Science and Technology	20200219	4/7/2020 10:40:56 AM	No
ChiCTR2000030001	344	213	http://www.chictr.org.cn/showproj.aspx?proj=49723	Inclusion	1		Triazavirin	Antiviral	Asia	China	240	Adults	All	1	Double blind		1	1	1	Hospitalised/Severe/ICU	Recruiting	2020-02-19	ChiCTR	The efficacy and safety of Triazavirin for 2019 novel coronary pneumonia (COVID-19): a multicenter, randomized, double blinded, placebo-controlled trial	The efficacy and safety of Triazavirin f	Hospitalised	Experimental group:Basic treatment combined Triazavirin;Control group:Basic treatment combined Triazavirin placebo;	Baofeng Yang	AV	Triazavirin	Time to Clinical recovery	yangbf@ems.hrbmu.edu.cn	+86 133 0451 2381	Heilongjiang Province hospital	Parallel	Novel Coronavirus Pneumonia (COVID-19)	Interventional	25 February 2020	Inclusion	AV	Triazavirin			Health commission of Heilongjiang province	20200219	4/7/2020 10:40:56 AM	No	18
ChiCTR2000029956	347	214	http://www.chictr.org.cn/showproj.aspx?proj=49618	Inclusion	1		TCM	UCM	Asia	China	120	N/A	All	N/A	Not specified		0		0	Diagnosed/suspected COVID	Not Recruiting	2020-02-17	ChiCTR	Chinese Medicine Promotes Rehabilitation Recommendations after 2019 Novel Coronavirus Infection (COVID-19)	Chinese Medicine Promotes Rehabilitation	Rehabilitation	Experimental group:Health Guidance + Guixi Regulating Lung Gong Method + Shenling Baizhu Powder + Moxibustion Treatment;Control group:Health Guidance + Guixi Regulating Lung Gong Method ;	Tang Jianyuan	TCM	TCM	Quality of life	tangjianyuan163@163.com	+86 13910768464	Hospital of Chengdu University of Traditional Chinese Medicine	Parallel	Novel Coronavirus Pneumonia (COVID-19)	Interventional	25 February 2020	Inclusion	Unconventional medicine	TCM (Shenling Baizhu Powder + Moxibustion Treatment)			Hospital of Chengdu University of Traditional Chinese Medicine	20200217	4/7/2020 10:40:56 AM	No
ChiCTR2000029996	348	215	http://www.chictr.org.cn/showproj.aspx?proj=49510	Inclusion	1		Favipiravir	Antiviral	Asia	China	60	Adults	All	1	Open label		1	1	0	Hospitalised/Severe/ICU	Recruiting	2020-02-20	ChiCTR	A randomized, open-label, controlled trial for the efficacy and safety of Farpiravir Tablets in the treatment of patients with novel coronavirus pneumonia (COVID-19)	A randomized, open-label, controlled tri	Hospitalised	Low-dose group:Tablets; 200mg; oral; twice a day; The adult dose is 1600 mg per time on first day; the duration of treatment will be 10 d.;Middle-dose group:Tablets; 200mg; orally; twice a day;The adult dose is 1800 mg per time on first day; the duration of treatment will be 10 d.;High-dose group:Tablets; 200mg; oral; twice a day; The adult dose is 2400 mg per time on first day; the duration of t…	Zhaohui Tong	AV	Favipiravir	Observation until discharge	13910930309@163.com	+86 13910930309	Beijing Chaoyang Hospital, Capital Medical University	Parallel	Novel Coronavirus Pneumonia (COVID-19)	Interventional	25 February 2020	Inclusion	AV	Farpiravir			Beijing Chaoyang Hospital, Capital Medical University	20200220	4/7/2020 10:40:56 AM	No	18
ChiCTR2000029992	350	216	http://www.chictr.org.cn/showproj.aspx?proj=49574	Inclusion	1		Chloroquine	Antimalaria	Asia	China	100	Adults	All	1	Open label		0		0	Hospitalised/Severe/ICU	Not Recruiting	2020-02-18	ChiCTR	A prospective, randomized, open label, controlled trial for chloroquine and hydroxychloroquine in patients with severe novel coronavirus pneumonia (COVID-19)	A prospective, randomized, open label, c	Severe	Chloroquine phosphate gloup:Chloroquine phosphate1.0gx2 days for the first dose, 0.5gx12 day from the third day ; Hydroxychloroquine sulfate gloup:Hydroxychloroquine sulfate 0.2g bid x 14 days;Routine treatment group:Recommended treatment plan for novel coronavirus pneumonia severe and critical cases;	Yin Zhenyu	AM	Chloroquine	Clinical recovery time	Yinzy@xmu.edu.cn	+86 13950120518	Zhongshan Hospital Affiliated to Xiamen University	Parallel	Novel Coronavirus Pneumonia (COVID-19)	Interventional	25 February 2020	Inclusion	Anti malaria	Chloroquine/Hydroxychloroquine			Zhongshan Hospital Affiliated to Xiamen University	20200218	4/7/2020 10:40:56 AM	No	18	75
ChiCTR2000030003	351	217	http://www.chictr.org.cn/showproj.aspx?proj=49770	Inclusion	1		TCM	UCM	Asia	China	480	N/A	All	N/A	Not specified		0		0	Diagnosed/suspected COVID	Not Recruiting	2020-02-19	ChiCTR	Optimization Protocal of Integrated Traditional Chinese and Western Medicine in the Treatment for Novel Coronavirus Pneumonia (COVID-19)	Optimization Protocal of Integrated Trad	Pneumonia	Group 1:Traditional Chinese Medicine prescription No. 1 and 2;Group 2:Gankeshuangqing capsule;Group 3:Shuanghuanglian oral liquid;	Tang Jianyuan	TCM	TCM	hospital stay	tangjianyuan163@163.com	+86 13910768464	Affiliated Hospital of Chengdu University of Traditional Chinese Medicine	Parallel	Novel Coronavirus Pneumonia (COVID-19)	Interventional	25 February 2020	Inclusion	Unconventional medicine	TCM (Gankeshuangqing/Shuanghuanglian)			Hospital of Chengdu University of Traditional Chinese Medicine	20200219	4/7/2020 10:40:56 AM	No
ChiCTR2000030002	352	218	http://www.chictr.org.cn/showproj.aspx?proj=49738	Inclusion	1		Tranilast	Antiinflammatory	Asia	China	60	Adults	All	1	Not specified		1	1	0	Diagnosed/suspected COVID	Recruiting	2020-02-19	ChiCTR	Clinical study of novel NLRP Inflammasome inhibitor (Tranilast) in the treatment of novel coronavirus pneumonia (COVID-19)	Clinical study of novel NLRP Inflammasom	Confirmed	control group:conventional therapy;Experience group:conventional therapy and Tranilast;	Hongliang He	AI	Tranilast	cure rate	44271370@qq.com	+86 15956927046	The First Affiliated Hospital of University of science and technology of China (Anhui Provincial Hospital)	Parallel	Novel Coronavirus Pneumonia (COVID-19)	Interventional	25 February 2020	Inclusion	Antiinflammatory	Tranilast			The First Affiliated Hospital of University of science and technology of China (Anhui Provincial Hospital)	20200219	4/7/2020 10:40:56 AM	No	18	85
ChiCTR2000029994	353	219	http://www.chictr.org.cn/showproj.aspx?proj=49309	Inclusion	1		TCM	UCM	Asia	China	200	Adults	All	N/A	Open label		0		0	Hospitalised/Severe/ICU	Not Recruiting	2020-02-18	ChiCTR	Liu-Zi-Jue Qigong and Acupressure Therapy for Pulmonary Function and Quality of Life in Patient with Severe novel coronavirus pneumonia (COVID-19): A Randomized Controlled Trial	Liu-Zi-Jue Qigong and Acupressure Therap	Severe	Control group:Conventional treatment;Experimental group:Conventional treatment +acupressure+Liuzijue qigong;	Fang Lei	TCM	TCM	lung function	fanglei586@126.com	+86 021-51323092	Faculty of Rehabilitation Medicine, Shanghai University of Chinese Medicine	Parallel	Novel Coronavirus Pneumonia (COVID-19)	Interventional	25 February 2020	Inclusion	Unconventional medicine	TCM (Acupressure+Liuzijue qigong)			Shanghai University of TCM	20200218	4/7/2020 10:40:56 AM	No	18	80
ChiCTR2000029978	354	220	http://www.chictr.org.cn/showproj.aspx?proj=49702	Inclusion	1		TCM	UCM	Asia	China	186	Adults	All	N/A	Single blind		0		1	Hospitalised/Severe/ICU	Not Recruiting	2020-02-18	ChiCTR	A randomized controlled trial for the efficacy of Dao-Yin in the prevention and controlling novel coronavirus pneumonia (COVID-19)	A randomized controlled trial for the ef	Hospitalised	Control group:Conventional treatment;Experimental group:Conventional treatment pius Dao Yin;	Fang Min	TCM	TCM	Length of hospital stay	fangmin19650510@163.com	+86 18930568005	Tuina Institute, Yueyang Hospital of Integrated Traditional Chinese and Western Medicine, Shanghai University of Traditional Chinese Medicine	Parallel	Novel Coronavirus Pneumonia (COVID-19)	Interventional	25 February 2020	Inclusion	Unconventional medicine	TCM (Dao Yin)			Yueyang Hospital of Integrated Traditional Chinese and Western Medicine, Shanghai University of Traditional Chinese Medicine,	20200218	4/7/2020 10:40:56 AM	No	18	60
ChiCTR2000029989	355	221	http://www.chictr.org.cn/showproj.aspx?proj=49720	Inclusion	1		INF-Beta	Other immunotherapeutics	Asia	China	300	Adults	All	1	Not specified		0		0	Diagnosed/suspected COVID	Not Recruiting	2020-02-18	ChiCTR	A randomized controlled Trial for therapeutic efficacy of Recombinant Human Interferon alpha 1b Eye Drops in the treatment of elderly with novel coronavirus pneumonia (COVID-19)	A randomized controlled Trial for therap	Pneumonia	experimental group.:Recombinant Human Interferon a1b Eye Drops ;Control group:placebo drop;	Feng Cao	IT	Recombinant Human Interferon a1b	Time to Clinical recovery	fengcao8828@163.com	+86 13911798280	Chinese PLA General Hospital	Parallel	Novel Coronavirus Pneumonia (COVID-19)	Interventional	25 February 2020	Inclusion	Unconventional medicine	Recombinant Human Interferon a1b Eye Drops			Chinese PLA General Hospital	20200218	4/7/2020 10:40:56 AM	No	60
ChiCTR2000029988	356	222	http://www.chictr.org.cn/showproj.aspx?proj=49218	Inclusion	1		Chloroquine	Antimalaria	Asia	China	80	Adults	All	1	Open label		1	1	0	Hospitalised/Severe/ICU	Recruiting	2020-02-18	ChiCTR	Clinical Study of Chloroquine Phosphate in the Treatment of Severe Novel Coronavirus Pneumonia (COVID-19)	Clinical Study of Chloroquine Phosphate	Severe	Experimental group:Chloroquine Phosphate;Control group:No;	Zhao Yan	AM	Chloroquine	Time to Clinical Recovery	doctoryanzhao@whu.edu.cn	+86 13995577963	Zhongnan Hospital of Wuhan University	Parallel	Novel Coronavirus Pneumonia (COVID-19)	Interventional	25 February 2020	Inclusion	Anti malaria	Chloroquine			Zhongnan Hospital of Wuhan University	20200218	4/7/2020 10:40:56 AM	No	18	70
ChiCTR2000029781	357	223	http://www.chictr.org.cn/showproj.aspx?proj=49138	Inclusion	1		TCM	UCM	Asia	China	160	Adults	All	1	Open label		0		1	Hospitalised/Severe/ICU	Recruiting	2020-02-13	ChiCTR	A multicenter, randomized, open and controlled trial for the efficacy and safety of Kang-Bing-Du granules in the treatment of novel coronavirus pneumonia (COVID-19)	A multicenter, randomized, open and cont	Severe	experimental group:routine treatment and Kangbingdu granules;control group:routine treatment ;	Xin Zheng	TCM	TCM	Disappearance rate of fever symptoms	Xin11@hotmail.com	+86 18602724981	Union Hospital affiliated to Tongji Medical College of Huazhong University of Science and Technology	Parallel	Novel Coronavirus Pneumonia (COVID-19)	Interventional	25 February 2020	Inclusion	Unconventional medicine	TCM (Kangbingdu)			Union Hospital affiliated to Tongji Medical College of Huazhong University of Science and Technology	20200213	4/7/2020 10:40:56 AM	No	18
ChiCTR2000029740	358	224	http://www.chictr.org.cn/showproj.aspx?proj=49317	Inclusion	1		Chloroquine	Antimalaria	Asia	China	78	Both	All	1	Not specified		1	1	0	Diagnosed/suspected COVID	Recruiting	2020-02-11	ChiCTR	Efficacy of therapeutic effects of hydroxycholoroquine in novel coronavirus pneumonia (COVID-19) patients(randomized open-label control clinical trial)	Efficacy of therapeutic effects of hydro	Pneumonia	hydroxychloroquine group:oral intake hydroxycholoroquine 0.2 twice a day;control group:conventional therapy;	Zhuoli Zhang	AM	Chloroquine	oxygen index	zhuoli.zhang@126.com	+86 13901094780	The First hospital of Peking University	Parallel	Novel Coronavirus Pneumonia (COVID-19)	Interventional	25 February 2020	Inclusion	Anti malaria	Hydroxychloroquine			The First Hospital of Peking University	20200211	4/7/2020 10:40:56 AM	No	16	99
ChiCTR2000029990	359	225	http://www.chictr.org.cn/showproj.aspx?proj=49674	Inclusion	1		Stem Cells	Stem cells	Asia	China	120	N/A	All	2	Not specified		0		1	Diagnosed/suspected COVID	Recruiting	2020-02-18	ChiCTR	Clinical trials of mesenchymal stem cells for the treatment of pneumonitis caused by novel coronavirus pneumonia (COVID-19)	Clinical trials of mesenchymal stem cell	Confirmed	experimental group:mesenchymal stem cells;control group:saline;	Robert Chunhua Zhao/Ronghua Jin	SC	Stem Cells	Improved respiratory system function	zhaochunhua@vip.163.com	+86 010-65125311	institute of basic medicine, Chinese Academy of medical sciences	Parallel	pneumonitis caused by novel coronavirus	Interventional	25 February 2020	Inclusion	Stem Cells	MSC			Institute of Basic Medical Sciences, Chinese Academy of Medical Sciences	20200218	4/7/2020 10:40:56 AM	No
ChiCTR2000029972	361	226	http://www.chictr.org.cn/showproj.aspx?proj=49664	Inclusion	1		Ultra Short Wave Electrotherapy	Other	Asia	China	40	Adults	All	N/A	Not specified		0		0	Diagnosed/suspected COVID	Recruiting	2020-02-17	ChiCTR	A randomized controlled trial for the Efficacy of Ultra Short Wave Electrotherapy in the treatment of Novel Coronavirus Pneumonia (COVID-19)	A randomized controlled trial for the Ef	Pneumonia	Experimental group:ultra short wave Electrotherapy;control:standard medical therapy;	Chen Hong	Other	Ultra Short Wave Electrotherapy	rate of Coronary virus nucleic acid negative	chenhong1129@hotmail.com	+86 13296508243	Tongji Hospital, Tongji Medical College, Huazhong University of Science and Technology	Parallel	Novel Coronavirus Pneumonia (COVID-19)	Interventional	25 February 2020	Inclusion	Unconventional medicine	ultra short wave Electrotherapy			Tongji Hospital, Tongji Medical College,Huazhong University of Science and Technology	20200217	4/7/2020 10:40:56 AM	No	18	65
ChiCTR2000029974	362	227	http://www.chictr.org.cn/showproj.aspx?proj=49321	Inclusion	1		Probiotic	Dietary supplements	Asia	China	300	Adults	All	N/A	Open label		1	1	1	Diagnosed/suspected COVID	Recruiting	2020-02-18	ChiCTR	A prospective, multicenter, open-label, randomized, parallel-controlled trial for probiotics to evaluate efficacy and safety in patients infected with 2019 novel coronavirus pneumonia (COVID-19)	A prospective, multicenter, open-label,	Confirmed	Experimental group:atic treatment medicines;Control group:Symptomatic treatment medicines;	Dong Liang	Dietary supplements	probiotics	Time to Clinical recovery	dl5506@126.com	+86 18560082787	Qilu Hospital of Shandong University	Parallel	Novel Coronavirus Pneumonia (COVID-19)	Interventional	25 February 2020	Inclusion	Unconventional medicine	Probiotics			Qingdao East Sea Pharmaceutical Co., Ltd.	20200218	4/7/2020 10:40:56 AM	No	18
ChiCTR2000029803	363	228	http://www.chictr.org.cn/showproj.aspx?proj=49428	Inclusion	1		Chloroquine	Antimalaria	Asia	China	320	Adults	All	N/A	Open label		0		0	Prevention	Not Recruiting	2020-02-14	ChiCTR	A prospective, randomized, open-label, controlled clinical study to evaluate the preventive effect of hydroxychloroquine on close contacts after exposure to the Novel Coronavirus Pneumonia (COVID-19)	A prospective, randomized, open-label, c	Prevention	A1:Hydroxychloroquine, small dose;A2:Hydroxychloroquine, high dose;B1:Abidol hydrochloride, small dose;B2:Abidol hydrochloride, high dose;	Zhan Zhang	AM	Chloroquine	Number of patients who have progressed to suspected or confirmed	doctorzhang2003@163.com	+86 18062567610	Renmin Hospital of Wuhan University	Parallel	Novel Coronavirus Pneumonia (COVID-19)	Interventional	25 February 2020	Exclusion	Prevention				Renmin Hospital of Wuhan University	20200214	4/7/2020 10:40:56 AM	No	18	60
ChiCTR2000029780	364	229	http://www.chictr.org.cn/showproj.aspx?proj=49220	Inclusion	1		TCM	UCM	Asia	China	160	Adults	All	1	Open label		0		1	Hospitalised/Severe/ICU	Recruiting	2020-02-13	ChiCTR	A multicenter, randomized, open, controlled trial for the efficacy and safety of Shen-Qi Fu-Zheng injection in the treatment of novel coronavirus pneumonia (COVID-19)	A multicenter, randomized, open, control	Severe	experimental group:Routine treatment and Shenqi Fuzheng Injection;control group:Routine treatment ;	Xin Zheng	TCM	TCM	Recovery time	Xin11@hotmail.com	+86 18602724981	Union Hospital affiliated to Tongji Medical College of Huazhong University of Science and Technology	Parallel	Novel Coronavirus Pneumonia (COVID-19)	Interventional	25 February 2020	Inclusion	Unconventional medicine	TCM (Shen-Qi Fu-Zheng)			Union Hospital affiliated to Tongji Medical College of Huazhong University of Science and Technology	20200213	4/7/2020 10:40:56 AM	No	18
ChiCTR2000029851	365	230	http://www.chictr.org.cn/showproj.aspx?proj=49534	Inclusion	1		Alpha lipoic acid	Dietary supplements	Asia	China	68	Adults	All	1	Not specified		1	1	1	Hospitalised/Severe/ICU	Recruiting	2020-02-15	ChiCTR	A multicenter, randomized controlled trial for the efficacy and safety of Alpha lipoic acid (iv) in the treatment of patients of severe novel coronavirus pneumonia (COVID-19)	A multicenter, randomized controlled tri	Severe	control group:conventional therapy and placebo;Experience group:conventional therapy and ALA;	Junbo Ge	Dietary supplements	Alpha lipoic acid	SOFA	jbge@zs-hospital.sh.cn	+86-21-64041990	Zhongshan Hospital, Fudan University	Parallel	Novel Coronavirus Pneumonia (COVID-19)	Interventional	25 February 2020	Inclusion	Unconventional medicine	Alpha lipoic acid			Zhongshan Hospital, Fudan University	20200215	4/7/2020 10:40:56 AM	No	35	74
ChiCTR2000030418	368	231	http://www.chictr.org.cn/showproj.aspx?proj=50341	Inclusion	1		TCM	UCM	Asia	China	80	Adults	Male	N/A	Open label		0		0	Mild/moderate	Recruiting	2020-03-01	ChiCTR	Application of rehabilitation lung exercise eight-segment exercise in patients with novel coronavirus pneumonia (COVID-19)	Application of rehabilitation lung exerc	Mild	Group 1:Eight lung exercises for rehabilitation;Group 2:Free activities;	Ni Jun	TCM	TCM	Post-traumatic stress disorder checklist and Clinical prognostic outcome and Il-6	nijun1000@126.com	+86 19890572216	The First Affiliated Hospital of Fujian Medical University	Parallel	Novel Coronavirus Pneumonia (COVID-19)	Interventional	2 March 2020	Inclusion	Adjunct therapy	Lung exercises			The First Affiliated Hospital of Fujian Medical University	20200301	4/7/2020 10:40:56 AM	No	18	80
ChiCTR2000030398	372	232	http://www.chictr.org.cn/showproj.aspx?proj=50173	Inclusion	1		bismuth potassium citrate	Other	Asia	China	340	Adults	All	N/A	Double blind		0		0	Hospitalised/Severe/ICU	Not Recruiting	2020-03-01	ChiCTR	A randomized, double-blind, placebo-controlled trial for evaluation of the efficacy and safety of bismuth potassium citrate capsules in the treatment of patients with novel coronavirus pneumonia (COVID-19).	A randomized, double-blind, placebo-cont	Hospitalised	Experimental group:Capsules of bismuth potassium citrate, 2 capsules at a time, once every 12 hours; take warm water with breakfast and dinner; do not take high protein foods such as milk at the same time.;Control group:Simulated capsules of bismuth potassium citrate, 2 capsules at a time, once every 12 hours; take warm water with breakfast and dinner; do not take high protein foods such as milk …	Zhang Dingyu	Other	bismuth potassium citrate	Pharynx swabs, lower respiratory tract samples (sputum/endotracheal aspiration/alveolar lavage), and anal swabs rt-pcr of novel coronavirus nucleic acid negative conversion rate.	1813886398@qq.com	+86 13507117929	Wuhan Jinyintan Hospital (Wuhan Infectious Diseases Hospital)	Parallel	Novel Coronavirus Pneumonia (COVID-19)	Interventional	2 March 2020	Inclusion	Adjunct therapy	Bismuth potassium citrate			Wuhan Jinyintan Hospital (Wuhan Infectious Diseases Hospital)	20200301	4/7/2020 10:40:56 AM	No	18	75
ChiCTR2000030333	373	233	http://www.chictr.org.cn/showproj.aspx?proj=48801	Inclusion	1		Pirfenidone	Antiinflammatory	Asia	China	292	Adults	All	N/A	Not specified		1	1	0	Hospitalised/Severe/ICU	Recruiting	2020-02-28	ChiCTR	A randomized, open-label controlled trial for the efficacy and safety of Pirfenidone in patients with severe and critical novel coronavirus pneumonia (COVID-19)	A randomized, open-label controlled tria	Severe	Pirfenidone group:Conventional standard treatment + Pirfenidone 400mg three times a day;Control group:Conventional standard treatment;	Huilan Zhang	IT	Pirfenidone	blood gas+chest CT+Refers to the pulse oxygen+K-bld questionnaire survey	huillanz_76@163.com	+86 15391532171	Tongji Hospital of Tongji Medical College; Huazhong Science and Technology University	Parallel	Novel Coronavirus Pneumonia (COVID-19)	Interventional	2 March 2020	Inclusion	Antiinflammatory	Pirfenidone			Tongji Hospital of Tongji Medical College; Huazhong Science and Technology University	20200228	4/7/2020 10:40:56 AM	No	18
ChiCTR2000030328	378	234	http://www.chictr.org.cn/showproj.aspx?proj=50241	Inclusion	1		Acetylcysteine	Other	Asia	China	60	Adults	All	1	Not specified		0		0	Hospitalised/Severe/ICU	Not Recruiting	2020-02-28	ChiCTR	Clinical application of inhaled acetylcysteine solution in the treatment of novel coronavirus pneumonia (COVID-19)	Clinical application of inhaled acetylcy	Severe	Experimental group:Acetylcysteine inhaled via tracheal tube;Control group:Placebo (saline) inhaled via tracheal tube;	Yun Lin	Other	Acetylcysteine	Lung CT after 3 days+7 days+Oxygenation parameters: SpO2, Partial arterial oxygen pressure (PaO2), PaO2/FiO2+Hospital stay	frank0130@126.com	+86 13986268403	Union Hospital, Tongji Medical College, Huazhong University of Science & Technology	Sequential	Novel Coronavirus Pneumonia (COVID-19)	Interventional	2 March 2020	Inclusion	Adjunct therapy	Acetylcysteine inhaled			Union Hospital, Tongji Medical College, Huazhong University of Science & Technology	20200228	4/7/2020 10:40:56 AM	No	18
ChiCTR2000030262	381	235	http://www.chictr.org.cn/showproj.aspx?proj=50136	Inclusion	1		IFN-κ + TFF2	Other drug combinations	Asia	China	30	Adults	All	N/A	Not specified		0		0	Diagnosed/suspected COVID	Recruiting	2020-02-26	ChiCTR	Clinical study for combination of anti-viral drugs and type I interferon and inflammation inhibitor TFF2 in the treatment of novel coronavirus pneumonia (COVID-19)	Clinical study for combination of anti-v	Confirmed	Group 2:Once for two days;Group 3:Once for one day;Group 1:Control Group;	Jianqing Xu	AV/IT	N/A	Viral load+Clinical features+Inflammation+Pulmonary imaging	xujianqing@shphc.org.cn	+86 18964630206	Shanghai Public Health Clinical Center	Sequential	Novel Coronavirus Pneumonia (COVID-19)	Interventional	2 March 2020	Inclusion	AV	TFF2			Shanghai Public Health Clinical Center	20200226	4/7/2020 10:40:56 AM	No	18	70
ChiCTR2000030260	382	236	http://www.chictr.org.cn/showproj.aspx?proj=50130	Inclusion	1		TCM	UCM	Asia	China	20	N/A	All	N/A	Open label		0		0	Diagnosed/suspected COVID	Not Recruiting	2020-02-26	ChiCTR	Clinical study for individualized nutritional assessment and supportive treatment of novel coronavirus pneumonia (COVID-19) patients in Tibetan Plateau	Clinical study for individualized nutrit	Pneumonia	Experimental group:enteral nutrition emulsion, tpf-t 200ml Bid;Control group:No intervention;	Lijia Deng	Dietary supplements	TCM	NRS 2002 score+BMI+triceps skinfold thickness (TSF)+7 different blood samples	27216302@qq.com	+86 17723451376	Ganzi Hospital of West China Hospital, Sichuan University	Parallel	Novel Coronavirus Pneumonia (COVID-19)	Interventional	2 March 2020	Inclusion	Nutrition	Enteral nutritionel emulsion			Ganzi Hospital of West China Hospital, Sichuan University	20200226	4/7/2020 10:40:56 AM	No
ChiCTR2000030265	383	237	http://www.chictr.org.cn/showproj.aspx?proj=49691	Inclusion	1		CRRT	Other	Asia	China	30	N/A	All	N/A	Not specified		1	1	0	Hospitalised/Severe/ICU	Not Recruiting	2020-02-26	ChiCTR	Study for continuous renal replacement therapy with adsorption filter in the treatment of the novel coronavirus pneumonia (COVID-19)	Study for continuous renal replacement t	Severe	High inflammation oXiris CRRT treatment group:oXiris CRRT treatment;High inflammation Conventional treatment group:Conventional treatment;Low inflammation conventional treatment group:Conventional treatment;	Kaijiang Yu	Other	oXiris CRRT	Inflammation factor	drkaijiang@163.com	+86 13303608899	The First Affiliated Hospital of Harbin Medical University	Parallel	Novel Coronavirus Pneumonia (COVID-19)	Interventional	2 March 2020	Inclusion	Adjunct therapy/Immunotherapy	CRRT Cytokine//toxin removal with filter			The First Affiliated Hospital of Harbin Medical University	20200226	4/7/2020 10:40:56 AM	No
ChiCTR2000030215	384	238	http://www.chictr.org.cn/showproj.aspx?proj=50107	Inclusion	1		TCM	UCM	Asia	China	120	Adults	All	N/A	Not specified		0		0	Diagnosed/suspected COVID	Not Recruiting	2020-02-25	ChiCTR	Study for the efficacy of Kangguan No. 1-3 prescription in the treatment of novel coronavirus pneumonia (COVID19)	Study for the efficacy of Kangguan No. 1	Confirmed	Experimental group 1:Routine treatment + Kanguan No. 1;Control group (Mild patients):Routine treatment;Experimental group 2:Routine treatment + Kanguan No. 2;Control group (general patient):Routine treatment;Experimental group 3:Routine treatment + Kanguan No. 3;Control group (severe patients):Routine treatment;	Shao Yi	TCM	TCM	Routine physical examination+Vital signs: breathing, body temperature (armpit temperature)+Blood routine AND MORE	freebee99@163.com	+86 13576955700	The First Affiliated Hospital of Nanchang University	Parallel	Novel Coronavirus Pneumonia (COVID-19)	Interventional	2 March 2020	Inclusion	Unconventional medicine	TCM			The First Affiliated Hospital of Nanchang University, Ten layers pulse Research Institute of traditional Chinese medicine, Nanchang University	20200225	4/7/2020 10:40:56 AM	No	18	65
ChiCTR2000030261	386	239	http://www.chictr.org.cn/showproj.aspx?proj=49963	Inclusion	1		Aerosol inhalation of exosomes	Other	Asia	China	26	N/A	All	N/A	Not specified		0		0	Diagnosed/suspected COVID	Not Recruiting	2020-02-26	ChiCTR	A study for the key technology of mesenchymal stem cells exosomes atomization in the treatment of novel coronavirus pneumonia (COVID-19)	A study for the key technology of mesenc	Suspected	Exocrine group:Aerosol inhalation of exosomes;Control group:Blank;	Meiping Chu	Other	Aerosol inhalation of exosomes	Lung Ct	chump1981@163.com	+86 15052103816	Wuxi Fifth People's Hospital	Parallel	Novel Coronavirus Pneumonia (COVID-19)	Interventional	2 March 2020	Inclusion	Antiinflammatory	Inhalation of exosomes of stemm cells to reduce lung inflammation			Wuxi Fifth People's Hospital	20200226	4/7/2020 10:40:56 AM	No
ChiCTR2000030255	387	240	http://www.chictr.org.cn/showproj.aspx?proj=50089	Inclusion	1		TCM	UCM	Asia	China	300	Adults	All	1	Not specified		0		0	Diagnosed/suspected COVID	Not Recruiting	2020-02-26	ChiCTR	Efficacy and Safety of Jing-Yin Granule in the treatment of novel coronavirus pneumonia (COVID-19) wind-heat syndrome	Efficacy and Safety of Jing-Yin Granule	Pneumonia	Routine treatment + Jing-Yin Granule:Jing-Yin Granule 2 bags / time, 3 times a day ;Routine treatment :Treat as prescribed in the sixth edition of the diagnosis and treatment plan, without using traditional Chinese medicine;	Liu Hua/Wang Qian	TCM	TCM	Clearance rate and time of main symptoms (fever, fatigue, cough)	yyliuhua@126.com	+86 18930568010	Shanghai University of Traditional Chinese Medicine	Parallel	Novel Coronavirus Pneumonia (COVID-19)	Interventional	2 March 2020	Inclusion	Unconventional medicine	TCM			Shanghai University of Traditional Chinese Medicine	20200226	4/7/2020 10:40:56 AM	No	18	75
ChiCTR2000030259	388	241	http://www.chictr.org.cn/showproj.aspx?proj=49918	inclusion	1		Ritonavir/Danorevir	Antiviral	Asia	China	60	Adults	All	N/A	Not specified		0		0	Diagnosed/suspected COVID	Recruiting	2020-02-26	ChiCTR	Evaluation Danorevir sodium tablets combined with ritonavir in the treatment of novel coronavirus pneumonia (COVID-19): a randomized, open and controlled trial	Evaluation Danorevir sodium tablets comb	Pneumonia	Experimental group:Danorevir sodium tablets,/ritonavir oral;Control group:Symptomatic treatment;	Junxue Wang	AV	Ritonavir/Danorevir	Rate of composite advers outcomes: SpO2, PaO2/FiO2, respiratory rate	docd1@sina.com	+86 18917387623	Shanghai Changzheng Hospital	Parallel	Novel Coronavirus Pneumonia (COVID-19)	Interventional	2 March 2020	Inclusion	AV	Danorevir (anti-HCV medicin)			Shanghai Changzheng Hospital	20200226	4/7/2020 10:40:56 AM	No	18	75
ChiCTR2000030022	389	242	http://www.chictr.org.cn/showproj.aspx?proj=49797	Inclusion	1		TCM	UCM	Asia	China	100	Adults	All	1	Open label		0		1	Hospitalised/Severe/ICU	Not Recruiting	2020-02-20	ChiCTR	A parallel, randomized controlled clinical trial for the efficacy and safety of Pediatric Huatanzhike granules (containing ipecacuanha tincture) in the treatment of mild and moderate novel coronavirus pneumonia (COVID-19)	A parallel, randomized controlled clinic	Hospitalised	Experimental group:Conventional therapy and Pediatric Huatanzhike granules;Control group:Conventional therapy;	Liangdan Sun	TCM	TCM	COVID-19 nucleic acid detection time from positive to negative (respiratory secretion) or (3,5,7,10 days from positive to negative rate);+Lung CT observation of inflammation absorption;+Proportion of cases with progressive disease	ahmusld@163.com	+86 13856985045	First Affiliated Hospital of Anhui Medical University	Parallel	Novel coronavirus pneumonia (COVID-19)	Interventional	2 March 2020	Inclusion	Unconventional medicine	TCM			First Affiliated Hospital of Anhui Medical University	20200220	4/7/2020 10:40:56 AM	No	18	80
ChiCTR2000030218	391	243	http://www.chictr.org.cn/showproj.aspx?proj=50115	Inclusion	1		TCM	UCM	Asia	China	80	Adults	All	N/A	Not specified		0		0	Diagnosed/suspected COVID	Recruiting	2020-02-25	ChiCTR	Study of Pinavir / Ritonavir Tablets (Trade Name: Kelizhi) Combined with Xiyanping Injection for Novel Coronavirus Pneumonia (COVID-19)	Study of Pinavir / Ritonavir Tablets (Tr	Pneumonia	Experimental group of ordinary COVID-19:Lopinavir / ritonavir tablets combined with Xiyanping injection;Control group of ordinary COVID-19:Keep ritonavir/ritonavir treatment;Experimental group of severe COVID-19:Lopinavir / ritonavir tablets combined with Xiyanping injection;	Xie Liangdong	TCM	TCM	Clinical recovery time+PSI	2590410004@qq.com	+86 13707077997	Fifth People's Hospital of Ganzhou	Parallel	Novel Coronavirus Pneumonia (COVID-19)	Interventional	2 March 2020	Inclusion	AV	Pinavir/Ritonavir			Fifth People's Hospital of Ganzhou	20200225	4/7/2020 10:40:56 AM	No	18
ChiCTR2000029991	394	244	http://www.chictr.org.cn/showproj.aspx?proj=49666	Inclusion	1		TCM	UCM	Asia	China	72	Adults	All	1	Open label		0		1	Mild/moderate	Recruiting	2020-02-18	ChiCTR	A randomized, open-label, controlled trial for the safety and efficiency of Kesuting syrup and Keqing capsule in the treatment of mild and moderate novel coronavirus pneumonia (COVID-19)	A randomized, open-label, controlled tri	Mild	Kesuting syrup group:conventional therapy and Kesuting syrup, p.o., 20ml, three times a day;Keqing capsule group:conventional therapy and Keqing capsule, p.o., three pills once, three times a day;control group:conventional therapy;	Wei Zhang	TCM	TCM	cough	zhangweiliuxin@163.com	+86 0791-88693401	The First Affiliated Hospital of Nanchang University	Parallel	novel coronavirus pneumonia (COVID-19)	Interventional	2 March 2020	Inclusion	Unconvetional medicine	TCM			The First Affiliated Hospital of Nanchang University	20200218	4/7/2020 10:40:56 AM	No	18	75
ChiCTR2000029755	395	245	http://www.chictr.org.cn/showproj.aspx?proj=49301	Inclusion	1		TCM	UCM	Asia	China	120	Adults	All	1	Open label		0		0	Diagnosed/suspected COVID	Recruiting	2020-02-12	ChiCTR	A randomized, open, parallel-controlled clinical trial on the efficacy and safety of Jingyebaidu granules in treating novel coronavirus pneumonia (COVID-19)	A randomized, open, parallel-controlled	Pneumonia	experimental group:routine treatment, Jinyebaidu granule, po, 1-2 bags once, 3 times a day;;control group:routinel treatment, treatment according to the fifth version of the diagnosis and treatment protocol, no use of traditional Chinese medicine.;	Liu Dong	TCM	TCM	Effectiveness Observation Index	ld_2069@163.com	+86 13507183749	Institutional Review Board, Tongji Hospital, Tongji Medical College, Huazhong University of Science and Technology	Parallel	novel coronavirus pneumonia (COVID-19)	Interventional	2 March 2020	Inclusion	Unconvetional medicine	TCM			Tongji Hospital, Tongji Medical College of HUST	20200212	4/7/2020 10:40:56 AM	No	18
ChiCTR2000030225	398	246	http://www.chictr.org.cn/showproj.aspx?proj=49945	Inclusion	1		TCM	UCM	Asia	China	186	Adults	All	N/A	Open label		0		0	Hospitalised/Severe/ICU	Not Recruiting	2020-02-26	ChiCTR	Clinical Reseach of Acupuncture in the treatment of Novel Coronavirus Pneumonia (COVID-19)	Clinical Reseach of Acupuncture in the t	Hospitalised	Experimental group:Conventional treatment & Acupuncture;Control Group:Conventional treatment;	Zhou Jia	TCM	TCM	Length of hospital stay+Discharge time of general type+Discharge time of severe type	pdzhoujia@163.com	+86 18017306677	Yueyang Hospital of Integrated Traditional Chinese and Western Medicine, Shanghai University of Traditional Chinese Medicine	Parallel	Novel Coronavirus Pneumonia (COVID-19)	Interventional	2 March 2020	Inclusion	Unconventional medicine	Acupuncture			Yueyang Hospital of Integrated Traditional Chinese and Western Medicine, Shanghai University of Traditional Chinese Medicine	20200226	4/7/2020 10:40:56 AM	No	18	80
ChiCTR2000029387	401	247	http://www.chictr.org.cn/showproj.aspx?proj=48782	Inclusion	1		ribavirin/interferon-alpha/lopinavir/ritonavir/LPV-r	Other drug combinations	Asia	China	108	Adults	All	N/A	Not specified		1	1	0	Diagnosed/suspected COVID	Recruiting	2020-01-29	ChiCTR	Comparative effectiveness and safety of ribavirin plus interferon-alpha, lopinavir/ritonavir plus interferon-alpha and ribavirin plus lopinavir/ritonavir plus interferon-alphain in patients with mild to moderate novel coronavirus pneumonia	Comparative effectiveness and safety of	Confirmed	arm A:Ribavirin + Interferon alpha-1b;arm B:lopinavir / ritonavir + interferon alpha-1b;arm C:Ribavirin + LPV/r+Interferon alpha-1b;	Yaokai Chen	AV/IT	ribavirin/interferon-alpha/lopinavir/ritonavir/LPV-r	The time to 2019-nCoV RNA negativity in patients	yaokaichen@hotmail.com	+86 023-65481658	Chongqing Public Health Medical Center	Parallel	Novel Coronavirus Pneumonia (COVID-19)	Interventional	2 March 2020	Inclusion	Antiviral	Ribavirin + Interferon vs lopinvir/ritonavir + interferion vs all three			Chongqing Public Health Medical Center	20200129	4/7/2020 10:40:56 AM	No	18	65
ChiCTR2000029386	403	248	http://www.chictr.org.cn/showproj.aspx?proj=48777	Inclusion	1		Glucocorticoid	Glucocorticoid	Asia	China	48	Adults	All	N/A	Not specified		1	1	0	Hospitalised/Severe/ICU	Recruiting	2020-01-29	ChiCTR	Effectiveness of glucocorticoid therapy in patients with severe novel coronavirus pneumonia: a randomized controlled trial	Effectiveness of glucocorticoid therapy	Severe	Experimental group:Methylprednisolone, intravenous injection, 1-2mg/kg·d for 3 days.;Control group:Without any glucocorticoid therapy;	Yaokai Chen	AI	Methylprednisolone	SOFA	yaokaichen@hotmail.com	+86 13638352995	Chongqing Public Health Medical Center	Parallel	Novel Coronavirus Pneumonia (COVID-19)	Interventional	2 March 2020	Inclusion	Antiinflammatory	Glucocorticoid			Chongqing Public Health Medical Center	20200129	4/7/2020 10:40:56 AM	No	18
ChiCTR2000029899	405	249	http://www.chictr.org.cn/showproj.aspx?proj=49536	Inclusion	1		Chloroquine	Antimalaria	Asia	China	100	Adults	All	1	Open label		1	1	1	Diagnosed/suspected COVID	Recruiting	2020-02-16	ChiCTR	Evaluation the Efficacy and Safety of Hydroxychloroquine Sulfate in Comparison with Phosphate Chloroquine in Mild and Commen Patients with Novel Coronavirus Pneumonia (COVID-19): a Randomized, Open-label, Parallel, Controlled Trial	Evaluation the Efficacy and Safety of Hy	Confirmed	hydroxychloroquine sulfate:Day1: first dose: 6 tablets(0.1g/table), second dose: 6 tablets (0.1g/table)after 6h ;Day2~5: 2 tablets (0.1g/table), BID;phosphate chloroquine:Day1-3:500mg,BID Day4-5:250mg,BID;	Shen Ning	AM	Chloroquine	Time to Clinical Recovery, TTCR on day 28	shenning1972@126.com	+86 15611908958	Peking University Third Hospital	Parallel	Novel Coronavirus Pneumonia (COVID-19)	Interventional	2 March 2020	Inclusion	Antimalaria	Hydroxychloroquine in severe COVID			Peking University Third Hospital	20200216	4/7/2020 10:40:56 AM	No	18
ChiCTR2000029898	406	250	http://www.chictr.org.cn/showproj.aspx?proj=49482	Inclusion	1		Chloroquine	Antimalaria	Asia	China	100	Adults	All	1	Open label		1	1	1	Hospitalised/Severe/ICU	Recruiting	2020-02-16	ChiCTR	Evaluation the Efficacy and Safety of Hydroxychloroquine Sulfate in Comparison with Phosphate Chloroquine in Severe Patients with Novel Coronavirus Pneumonia (COVID-19): a Randomized, Open-Label, Parallel, Controlled Trial	Evaluation the Efficacy and Safety of Hy	Severe	hydroxychloroquine sulfate:Day1: first dose: 6 tablets(0.1g/table), second dose: 6 tablets (0.1g/table)after 6h ;Day2~5: 2 tablets (0.1g/table), BID;phosphate chloroquine:Day 1-3:500mg BID; Day 4-5:250mg BID;	Shen Ning	AM	Chloroquine	TTCI (Time to Clinical Improvement) day 28	shenning1972@126.com	+86 15611908958	Peking University Third Hospital	Parallel	Novel Coronavirus Pneumonia (COVID-19)	Interventional	2 March 2020	Inclusion	Antimalaria	Hydroxychloroquine in mild COVID			Peking University Third Hospital	20200216	4/7/2020 10:40:56 AM	No	18	75
ChiCTR2000030535	407	251	http://www.chictr.org.cn/showproj.aspx?proj=49790	Inclusion	1		Ebastine	Antiinflammatory	Asia	China	100	N/A	All	1	Single blind		1	1	1	Diagnosed/suspected COVID	Recruiting	2020-03-06	ChiCTR	Multi-Center Clinical Study on the Treatment of Patients with Novel Coronavirus Pneumonia (COVID-19) by Ebastine	Multi-Center Clinical Study on the Treat	Pneumonia	experimental group:ebastine 10mg bid, nterferon-alpha aerosol inhalation 5million U bid and Lopinavir 200 mg, 2 capsules at a time, bid;control group:interferon-alpha aerosol inhalation 5million U bid and Lopinavir 200 mg, 2 capsules at a time, bid;	Xu Zhihua	AI	Ebastine	Clinical therapeutic course	1121733818@qq.com	+86 18508160990	Mianyang Central Hospital	Parallel	Novel Coronavirus Pneumonia (COVID-19)	Interventional	9 March 2020	Inclusion	Antihistamine	Ebastine			Wuhan Red Cross Hospital	20200306	4/7/2020 10:40:56 AM	No
ChiCTR2000030522	408	252	http://www.chictr.org.cn/showproj.aspx?proj=44213	Inclusion	1		TCM	UCM	Asia	China	100	Adults	All	N/A	Double blind		0		1	Hospitalised/Severe/ICU	Recruiting	2020-03-06	ChiCTR	Efficacy and safety of Ma-Xing-Gan-Shi decoction in the treatment of novel coronavirus pneumonia (COVID-19)	Efficacy and safety of Ma-Xing-Gan-Shi d	Hospitalised	experimental group:Ma-Xing-Gan-Shi decoction and Conventional Western Medicine Treatment;control group:placebo and Conventional Western Medicine Treatment;	Chuantao Zhang	TCM	TCM	Time to Clinical Recovery (TTCR)	1035788783@qq.com	+86 13880336152	Affiliated Hospital of Chengdu University of Traditional Chinese Medicine	Parallel	Novel Coronavirus Pneumonia (COVID-19)	Interventional	9 March 2020	Inclusion	Unconventional medicine	TCM			Affiliated Hospital of Chengdu University of Traditional Chinese Medicine	20200306	4/7/2020 10:40:56 AM	No	18	75
ChiCTR2000030540	410	253	http://www.chictr.org.cn/showproj.aspx?proj=50658	Inclusion	1		CRRT dialysis	Other	Asia	China	152	Adults	All	N/A	Not specified		1	1	0	Hospitalised/Severe/ICU	Not Recruiting	2020-03-06	ChiCTR	Research for the mechanism of improvement of novel coronavirus pneumonia (COVID-19) patients' pulmonary exudation by continuous renal replacement therapy	Research for the mechanism of improvemen	Hospitalised	CRRT group:CRRT;Control group:Routine treatment, CRRT only when there are emergency indications;	Li Shusheng	AT	CRRT	Chest imaging+Oxygenation index+Extravascular pulmonary water+pulmonary vascular permeability index, PVPI+Inflammatory factors+Tissue kallikrein	shushengli16@sina.com	+86 13971086498	Tongji Hospital Affiliated to Tongji Medical College of Huazhong University of science and technology	Parallel	Novel Coronavirus Pneumonia (COVID-19)	Interventional	9 March 2020	Inclusion	Adjunctive	CRRT			Tongji Hospital Affiliated to Tongji Medical College of Huazhong University of science and technology	20200306	4/7/2020 10:40:56 AM	No	18	90
ChiCTR2000030627	411	254	http://www.chictr.org.cn/showproj.aspx?proj=50727	Inclusion	1		Convalescent Plasma	Antibodies	Asia	China	30	N/A	All	N/A	Not specified		1	1	0	Hospitalised/Severe/ICU	Recruiting	2020-03-08	ChiCTR	Study for using the healed novel coronavirus pneumonia (COVID-19) patients plasma in the treatment of severe critical cases	Study for using the healed novel coronav	Severe	Experimental group:Convalescent plasma therapy + routine treatment;Control group:routine treatment;	Guojun Zhang	IT	Plasma	Tempreture+Virus nucleic acid detection	zlgj-001@126.com	+86 13673665268	The First Affiliated Hospital of Zhengzhou University	Parallel	Novel Coronavirus Pneumonia (COVID-19)	Interventional	9 March 2020	Inclusion	Adjunctive	Plasma treatment			The First Affiliated Hospital of Zhengzhou University	20200308	4/7/2020 10:40:56 AM	No
ChiCTR2000030518	412	255	http://www.chictr.org.cn/showproj.aspx?proj=50586	Inclusion	1		TCM	UCM	Asia	China	60	Adults	All	N/A	Not specified		1	1	0	Diagnosed/suspected COVID	Recruiting	2020-03-05	ChiCTR	Zedoary Turmeric Oil for Injection in the treatment of Novel Coronavirus Pneumonia (COVID-19): a randomized, open, controlled trial	Zedoary Turmeric Oil for Injection in th	Confirmed	Experimental group:Intravenous drip, 0.2 g (4 vials) once daily for adults; slow drip after dilution with 250 ml of 5% Glucose Injection or 0.9% Sodium Chloride Injection, not less than 120 minutes or 30-40 drops/minute. Continuous administration for 7 days, observation until 21 days or discharge;Control group:Conventional treatment, no control drug;	Yuanrong Dai	TCM	TCM	Real-time fluorescent RT-PCR detection of pharyngeal swab were used to detect the negative conversion rate of the new coronavirus nucleic acid (tested after the end of medication) and the negative conversion time(measured every other day after the start of medication, determined according to clinical needs)	13968888872@163.com	+86 13857715778	the Second Affiliated Hospital of Wenzhou Medical University	Parallel	Novel Coronavirus Pneumonia (COVID-19)	Interventional	9 March 2020	Inclusion	Unconventional medicine	TCM			The Second Affiliated Hospital of Wenzhou Medical University	20200305	4/7/2020 10:40:56 AM	No	18
ChiCTR2000030578	414	256	http://www.chictr.org.cn/showproj.aspx?proj=50690	Inclusion	1		Pulmonary rehabilitation	Respiratory adjuncts (ventilator / gas)	Asia	China	40	N/A	All	N/A	Open label		0		0	Diagnosed/suspected COVID	Not Recruiting	2020-03-08	ChiCTR	Clinical Prediction and Intervention of Pulmonary Function Impairment in Patients with Novel Coronavirus Pneumonia (COVID-19)	Clinical Prediction and Intervention of	Pneumonia	Experimental group:Lung rehabilitation training+Conventional treatment;Control group:Conventional treatment;	Liu Yi	AT	Lung rehabilitation training	Pulmonary function+6 minutes walking distance+The Short Form -36 Healthy Survey	15168888626@163.com	+86 18660117915	Shandong Provincial Hospital	Parallel	Novel Coronavirus Pneumonia (COVID-19)	Interventional	9 March 2020	Inclusion	Adjunctive	Lung exercises			Shandong Provincial Hospital	20200308	4/7/2020 10:40:56 AM	No
ChiCTR2000030471	417	257	http://www.chictr.org.cn/showproj.aspx?proj=50421	Inclusion	1		Lipoic acid	Dietary supplements	Asia	China	394	Adults	All	1	Single blind		1	1	1	Mild/moderate	Recruiting	2020-03-02	ChiCTR	Efficacy and safety of lipoic acid injection in reducing the risk of progression in common patients with novel coronavirus pneumonia (COVID-19)	Efficacy and safety of lipoic acid injec	Mild	Lipoic acid group:Routine Therapy and administration of Lipoic acid injection;Blank control group:Routine Therapy and administration of placebo;	Chen Chunbo	Dietary supplements	Lipoic acid	Progression rate from mild to critical/severe	gghicu@163.com	+86 13922745788	Maoming People's Hospital	Parallel	Novel Coronavirus Pneumonia (COVID-19)	Interventional	9 March 2020	Inclusion	Nutrition	Lipo acid therapy			Maoming People's Hospital	20200302	4/7/2020 10:40:56 AM	No	18	75
ChiCTR2000030484	418	258	http://www.chictr.org.cn/showproj.aspx?proj=50263	Inclusion	1		Stem Cells	Stem cells	Asia	China	90	N/A	All	N/A	Not specified	0	0		0	Diagnosed/suspected COVID	Not Recruiting	2020-03-03	ChiCTR	HUMSCs and Exosomes Treating Patients with Lung Injury following Novel Coronavirus Pneumonia (COVID-19)	HUMSCs and Exosomes Treating Patients wi	Confirmed	treatment group1:HUMSCs: intravenous infusion, 5 × 10E7 cells / time, once / week, twice / course;treatment group 2:HUMSCs: intravenous infusion, 5 × 107 cells / time, 1 time / week, 2 times / course, a total of 2 courses; Exosomes: intravenous administration, 180mg / time, 1 time / day, 7 days / course, 2 courses in total;control group:The control group was given the same amount of placebo (stem…	Jie Luo	SC	Stem Cells	So many! Not mortality	182190248@qq.com	+86 0719 8801713	Shiyan Taihe hospital	Parallel	Lung injury	Interventional	9 March 2020	Inclusion	Antiinflammatory	IV exosomes of stemm cells to reduce lung inflammation			Hubei Shiyan Taihe hospital	20200303	4/7/2020 10:40:56 AM	No
ChiCTR2000030481	419	259	http://www.chictr.org.cn/showproj.aspx?proj=50453	Inclusion	1		Glucocorticoid	Glucocorticoid	Asia	China	200	Adults	All	1	Not specified		1	1	1	Diagnosed/suspected COVID	Recruiting	2020-03-03	ChiCTR	The clinical value of corticosteroid therapy timing in the treatment of novel coronavirus pneumonia (COVID-19): a prospective randomized controlled trial	The clinical value of corticosteroid the	Pneumonia	Early corticosteroid intervention group:Early corticosteroid intervention;Middle-late corticosteroid intervention group:Middle-late corticosteroid intervention;Control group:No corticosteroid;	Chen Zhenshun	AI	corticosteroid	The time of duration of COVID-19 nucleic acid RT-PCR test results of respiratory specimens (such as throat swabs) or blood specimens change to negative.	chzs1990@163.com	+86 13627288300	Zhongnan Hospital of Wuhan University	Parallel	Novel Coronavirus Pneumonia (COVID-19)	Interventional	9 March 2020	Inclusion	Antiinflammatory	Glucocorticoid			Zhongnan Hospital of Wuhan University	20200303	4/7/2020 10:40:56 AM	No	18
ChiCTR2000030467	420	260	http://www.chictr.org.cn/showproj.aspx?proj=50378	Inclusion	1		TCM	UCM	Asia	China	60	N/A	All	N/A	Open label		0		0	Diagnosed/suspected COVID	Not Recruiting	2020-03-02	ChiCTR	A Randomized Controlled Trial for the Influence of TCM Psychotherapy on Negative Emotion of Patients with Novel Coronavirus Pneumonia (COVID-19) Based on Network Platform	A Randomized Controlled Trial for the	Confirmed/suspected	Control group:TCM + Conventional medicine treatment + conventional medicine's psychological intervention;Experimental group:Integrated Chinese and Conventional medicine treatment + conventional medicine's psychological intervention + TCM psychological intervention;	Wei Yao	TCM	TCM	Psychological status (DASS-21)	411484335@qq.com	+86 17709877386	Dalian Medical University	Parallel	Novel Coronavirus Pneumonia (COVID-19)	Interventional	9 March 2020	Inclusion	Unconventional medicine + pchycological therapy	TCM + psychotherapy			Dalian Medical University, Dalian, China.	20200302	4/7/2020 10:40:56 AM	No
ChiCTR2000030469	421	261	http://www.chictr.org.cn/showproj.aspx?proj=50082	Inclusion	1		TCM	UCM	Asia	China	96	Adults	All	N/A	Not specified		0		0	Diagnosed/suspected COVID	Recruiting	2020-03-02	ChiCTR	A randomized parallel controlled trial for LIUSHENWAN in Treatment of Novel Coronavirus Pneumonia (COVID-19)	A randomized parallel controlled trial f	Pneumonia	Control group:Coventional Treatment;Experimental group:Conventional treatment+LIUSHENWAN;	Xiuming Song	TCM	TCM	fever clearance time+Effective rate of TCM symptoms	Xiumingsong@sina.com	+86 13817525012	Shuguang Hospital Affiliated to Shanghai University of T.C.M.	Parallel	Novel Coronavirus Pneumonia (COVID-19)	Interventional	9 March 2020	Inclusion	Unconventional medicine	TCM			Shanghai University of TCM	20200302	4/7/2020 10:40:56 AM	No	18	65
ChiCTR2000030480	423	262	http://www.chictr.org.cn/showproj.aspx?proj=50470	Inclusion	1		INF-Alpha	Other immunotherapeutics	Asia	China	328	Adults	All	1	Open label		0		0	Diagnosed/suspected COVID	Recruiting	2020-03-03	ChiCTR	Randomized, open, blank controlled trial for the efficacy and safety of recombinant human interferon alpha 1beta in the treatment of Wuhan patients with novel coronavirus pneumonia (COVID-19)	Randomized, open, blank controlled trial	Confirmed	Interferon Therapy Group:Standard treatment + cerrokin (recombinant human interferon alpha 1beta) 10UG BID is administered by nebulization for 10 days.;Control group:Standard treatment + blank;	Huilan Zhang	IT	cerrokin (recombinant human interferon alpha 1beta	Incidence of side effects	huilanz_76@163.com	+86 15391532171	Department of Respiratory and Critical Care Medicine, Tongji Hospital of Tongji Medical College, Huazhong University of Science and Technology	Parallel	Novel Coronavirus Pneumonia (COVID-19)	Interventional	9 March 2020	Inclusion	Antiviral	Interferon inhalation			Department of Respiratory and Critical Care Medicine, Tongji Hospital of Tongji Medical College, Huazhong University of Science and Technology	20200303	4/7/2020 10:40:56 AM	No	18	110
ChiCTR2000030479	424	263	http://www.chictr.org.cn/showproj.aspx?proj=50450	Inclusion	1		TCM	UCM	Asia	China	100	Adults	All	N/A	Open label		0		1	Diagnosed/suspected COVID	Not Recruiting	2020-03-03	ChiCTR	Study for the Effectiveness and Safety of Yi-Qi Hua-shi Jie-Du-Fang in the Treatment of the Novel Coronavirus Pneumonia (COVID-19)	Study for the Effectiveness and Safety o	Confirmed	Control group:Refer to the National Health Office Medical Letter (2020) 77 document "Diagnosis and treatment plan for the novel coronavirus disease (trial version 5)" general treatment plan.;Experimental group:Refer to the National Health Office Medical Letter (2020) 77 document "Diagnosis and treatment plan for the novel coronavirus disease (trial version 5)" general treatment plan. Based on the…	Zhijun Fang	TCM	TCM	lasting time of fever+lasting time of novel coronavirus pneumonia virus nucleic acid detected by RT-PCR and negative result rate of the novel coronavirus disease nucleic acid	fangzjnj@hotmail.com	+86 13372018676	Affiliated Hospital of traditional Chinese and Western Medicine Nanjing University of Chinese Medicine	Parallel	Novel Coronavirus Pneumonia (COVID-19)	Interventional	9 March 2020	Inclusion	Unconventional medicine	TCM			Affiliated Hospital of traditional Chinese and Western Medicine Nanjing University of Chinese Medicine	20200303	4/7/2020 10:40:56 AM	No	18	75
ChiCTR2000029993	428	264	http://www.chictr.org.cn/showproj.aspx?proj=49435	Inclusion	1		TCM	UCM	Asia	China	40	Adults	All	N/A	Open label		1	1	1	Diagnosed/suspected COVID	Recruiting	2020-02-18	ChiCTR	A pilot study for Integrated Chinese and Western Medicine in the treatment of non-critical novel coronavirus pneumonia (COVID-19)	A pilot study for Integrated Chinese and	Confirmed	group A:Arbidol Hydrochloride Tablets, Liushen Capsule, standard therapy;control group:standard therapy;	Ye Feng/ Yang Zifeng/ Xu Xuyan/ Zhu Jun/ Jiang Lihong/ Zhang Yunhui/ Yuan Bing/ Chen Shi/ Fan Jie	TCM	TCM	Main symptom relief time(Temperature/oxygen saturation/respiratory rate)	yefeng@gird.cn	+86 13710494278; +86 13622273918	The First Affiliated Hospital of Guangzhou Medical University	Parallel	Novel Coronavirus Pneumonia (COVID-19)	Interventional	9 March 2020	Inclusion	Unconventional medicine	TCM			The First Affiliated Hospital of Guangzhou Medical University	20200218	4/7/2020 10:40:56 AM	No	18
ChiCTR2000029638	429	265	http://www.chictr.org.cn/showproj.aspx?proj=49224	Inclusion	1		INF (rSIFN-co)	Other immunotherapeutics	Asia	China	100	Adults	All	N/A	Single blind		0		1	Diagnosed/suspected COVID	Recruiting	2020-02-08	ChiCTR	A Multicenter, Randomized, Controlled trial for Recombinant Super-Compound Interferon (rSIFN-co) in the Treatment of 2019 Novel Coronavirus (2019-nCoV) Infected Pneumonia	A Multicenter, Randomized, Controlled tr	Confirmed	Treatment group:nebulization of recombinant super-compound interferon (rSIFN-co);Control group:nebulization of interferon a;	Lunxu Liu	IT	interferon (rSIFN-co)	Clinical symptoms	lunxu_liu@aliyun.com	+86 18980601525	West China Hospital, Sichuan University	Parallel	Novel Coronavirus Pneumonia (COVID-19)	Interventional	9 March 2020	Inclusion	Antiviral	Interferon inhalation			West China Hospital, Sichuan University	20200208	4/7/2020 10:40:56 AM	No	18	75
ChiCTR2000029580	432	266	http://www.chictr.org.cn/showproj.aspx?proj=49088	Inclusion	1		Ruxolitinib/stem cell	Other drug combinations	Asia	China	70	Adults	All	N/A	Single blind		0		0	Hospitalised/Severe/ICU	Recruiting	2020-02-05	ChiCTR	Severe novel coronavirus pneumonia (COVID-19) patients treated with ruxolitinib in combination with mesenchymal stem cells: a prospective, single blind, randomized controlled clinical trial	Severe novel coronavirus pneumonia (COVI	Severe	Experimental group:Ruxolitinib combined with mesenchymal stem cell;control group: Routine treatment;	Jianfeng Zhou	IT/SC	Ruxolitinib/stem cell	Safety	zhougene@medmail.com.cn	+86 027 83665506	Department of Hematology, Tongji Hospital, Tongji Medical College, Huazhong University of Science and Technology	Parallel	novel coronavirus pneumonia (COVID-19)	Interventional	9 March 2020	Inclusion	Antiinflammation	Ruxolitinib + stemcells			Department of Hematology, Tongji Hospital, Tongji Medical College, Huazhong University of Science and Technology	20200205	4/7/2020 10:40:56 AM	No	18	75
ChiCTR2000029434	433	267	http://www.chictr.org.cn/showproj.aspx?proj=48889	Inclusion	1		TCM	UCM	Asia	China	240	Adults	All	1	Open label		0		1	Mild/moderate	Recruiting	2020-02-01	ChiCTR	A randomized, open-label, blank-controlled trial for Lian-Hua Qing-Wen Capsule /Granule in the treatment of novel coronavirus pneumonia (COVID-19)	A randomized, open-label, blank-controll	Mild	Routine treatment + Lianhua Qingwen Capsules/granules:4 capsules / time or 1 bag / time, 3 times a day;Conventional treatment:Treat as prescribed in the fourth edition of the diagnosis and treatment plan, without using traditional Chinese medicine;	Zhong Nanshan/Zhang Boli/Li Lanjuan/Duan Zhongping/Li Xingwang/Liu Qingquan/Song Yuanlin/Jia Zhenhua	TCM	TCM	Clinical symptoms	jiactm@163.com	+86 0311 83855881	Hebei Yiling Hospital	Parallel	Novel Coronavirus Pneumonia (COVID-19)	Interventional	9 March 2020	Inclusion	Unconventional medicine	TCM			Hebei Yiling Hospital, Renmin Hospital of Wuhan University	20200201	4/7/2020 10:40:56 AM	No	18
ChiCTR2000029757	435	268	http://www.chictr.org.cn/showproj.aspx?proj=49081	Inclusion	1		Convalescent Plasma	Antibodies	Asia	China	200	Adults	All	N/A	Open label		1	1	1	Hospitalised/Severe/ICU	Recruiting	2020-02-12	ChiCTR	Convalescent plasma for the treatment of severe and critical novel coronavirus pneumonia (COVID-19): a prospective randomized controlled trial	Convalescent plasma for the treatment of	Severe	Experimental group:Conventional treatment and convalescent plasma therapy;Control group:Conventional treatment;	Cao Bin	IT	Convalescent plasma	clinical improvement	caobin_ben@163.com	13911318339	China-Japan friendship hospital	Parallel	novel coronavirus pneumonia (COVID-19)	Interventional	9 March 2020	Inclusion	Adjunctive	Plasma treatment			China-Japan friendship hospital	20200212	4/7/2020 10:40:56 AM	No	18	-
ChiCTR2000029549	436	269	http://www.chictr.org.cn/showproj.aspx?proj=49014	Inclusion	1		TCM	UCM	Asia	China	400	N/A	All	N/A	Not specified		0		0	Diagnosed/suspected COVID	Recruiting	2020-02-04	ChiCTR	Recommendations of Integrated Traditional Chinese and Western Medicine for Novel Coronavirus Pneumonia (COVID-19)	Recommendations of Integrated Traditiona	Confirmed/suspected	Experimental group:Western medicine routine treatment combined with traditional Chinese medicine treatment;Control group:Western medicine routine treatment;	Xie Chunguang	TCM	TCM	Severe conversion rate	xcg718@aliyun.com	+86 18980880132	Hospital of Chengdu University of Traditional Chinese Medicine	Parallel	novel coronavirus pneumonia (COVID-19)	Interventional	9 March 2020	Inclusion	Unconventional medicine	TCM			Hospital of Chengdu University of Traditional Chinese Medicine	20200204	4/7/2020 10:40:56 AM	No
ChiCTR2000029479	437	270	http://www.chictr.org.cn/showproj.aspx?proj=48773	Inclusion	1		TCM	UCM	Asia	China	20000	N/A	All	N/A	Open label		0		0	Prevention	Recruiting	2020-02-02	ChiCTR	Research for Traditional Chinese Medicine Technology Prevention and Control of Novel Coronavirus Pneumonia (COVID-19) in the Community Population	Research for Traditional Chinese Medicin	Prevention	Experimental group:1. Jinhao Artemisia Antipyretic Granules 8g / time, bid, take it with warm water after meals; 2. Huoxiangzhengqi oral liquid 10ml / time, bid, orally after meals.;blank cntrol group:non-intervention;	Tang Jianyuan	TCM	TCM	Inccidence of 2019-nCoV pneumonia	tangjianyuan163@163.com	+86 13910768464	Hospital of Chengdu University of Traditional Chinese Medicine	Cluster randomization	novel coronavirus pneumonia (COVID-19)	Interventional	9 March 2020	Inclusion	Unconventional medicine	TCM			Hospital of Chengdu University of Traditional Chinese Medicine	20200202	4/7/2020 10:40:56 AM	No
ChiCTR2000029308	438	271	http://www.chictr.org.cn/showproj.aspx?proj=48684	inclusion	1		Ritonavir/Lopinavir	Antiviral	Asia	China	160	Adults	All	N/A	Open label	1	0	1	0	Hospitalised/Severe/ICU	Recruiting	2020-01-23	ChiCTR	A randomized, controlled open-label trial to evaluate the efficacy and safety of lopinavir-ritonavir in hospitalized patients with novel coronavirus pneumonia (COVID-19)	A randomized, controlled open-label tria	Hospitalised	intervention group:Lopinavir-ritonavir tablets (each containing 200 mg of lopinavir and 50 mg of ritonavir), twice a day, 2 tablets at a time;Control group:Conventional standardized treatment;	Zhang Dingyu	AV	Ritonavir/Lopinavir	Mortality	1813886398@qq.com	13507117929	Wuhan Jinyintan Hospital (Wuhan Infectious Diseases Hospital)	Parallel	Novel Coronavirus Pneumonia (COVID-19)	Interventional	9 March 2020	Inclusion	Antiviral	Lopinavir-ritonavir			Wuhan Jinyintan Hospital (Wuhan Infectious Diseases Hospital)	20200123	4/7/2020 10:40:56 AM	No	18
ChiCTR2000030897	440	272	http://www.chictr.org.cn/showproj.aspx?proj=50462	Inclusion	1		Probiotic	Dietary supplements	Asia	China	20	N/A	All	N/A	Not specified		0		1	Diagnosed/suspected COVID	Recruiting	2020-03-16	ChiCTR	Evaluation of the effect of taking Newgen beta-gluten probiotic composite powder to nutrition intervention of patients with novel coronavirus pneumonia (COVID-19)	Evaluation of the effect of taking Newge	Pneumonia	Control group:Routine medicines and food;Experimental group:Taking Newgen beta-gluten probiotic composite powder;	Honghua Ye	Dietary supplements	probiotic	serum albumin	yehonghua@medmail.com.cn	+86 13505743664	HwaMei Hospital, University of Chinese Academy of Sciences	Parallel	Novel Coronavirus Pneumonia (COVID-19)	Interventional	16 March 2020	Inclusion	Nutrition	Probiotic nutrition			HwaMei Hospital, University of Chinese Academy of Sciences	20200316	4/7/2020 10:40:56 AM	No
ChiCTR2000030892	441	273	http://www.chictr.org.cn/showproj.aspx?proj=51118	Inclusion	1		Pirfenidone	Antiinflammatory	Asia	China	40	Adults	All	N/A	Open label		0		0	Hospitalised/Severe/ICU	Recruiting	2020-03-16	ChiCTR	Efficacy and Safety of Pirfenidone in the Treatment of Severe Post-Novel Coronavirus Pneumonia (COVID-19) Fibrosis: a prospective exploratory experimental medical study	Efficacy and Safety of Pirfenidone in th	Severe	Experimental group:Pirfenidone;Control group:Blank;	Qun Luo	AI	Pirfenidone	HRCT pulmonary fibrosis score	luoqunx@163.com	+86 13710658121	State Key Laboratory of Respiratory Disease, National Clinical Center for Respiratory Disease, Guangzhou Institute of Respiratory Health, The First Affiliated Hospital of Guangzhou Medical University	Parallel	Fibrosis after Severe Coronavirus Disease 2019 (COVID-19) Pneumonia	Interventional	16 March 2020	Inclusion	Anti-inflammation	Pifenidone, (antifibrotic, anti-inflammatory, and antioxidant )			State Key Laboratory of Respiratory Disease, National Clinical Center for Respiratory Disease, Guangzhou Institute of Respiratory Health, The First Affiliated Hospital of Guangzhou Medical University	20200316	4/7/2020 10:40:56 AM	No	18	80
ChiCTR2000030853	444	274	http://www.chictr.org.cn/showproj.aspx?proj=51081	Inclusion	1		Dexmedetomidine	Other	Asia	China	200	Adults	All	N/A	Not specified		0		0	Hospitalised/Severe/ICU	Not Recruiting	2020-03-16	ChiCTR	Evaluation of the protective effect of dexmedetomidine on patients with severe novel coronavirus pneumonia (COVID-19)	Evaluation of the protective effect of d	Severe	Case series:dexmedetomidine;	Wen Jianli	Other	dexmedetomidine	CK-MB	zywenjianli@163.com	+86 15186660001	The Third Affiliated Hospital of Zunyi Medical University	Sequential	Novel Coronavirus Pneumonia (COVID-19)	Interventional	16 March 2020	Exclusion	Adjunctive	Dexmedetomidine			Department of critical care medicine, the third affiliated hospital of zunyi medical university	20200316	4/7/2020 10:40:56 AM	No	18
ChiCTR2000030804	452	275	http://www.chictr.org.cn/showproj.aspx?proj=51018	Inclusion	1		TCM	UCM	Asia	China	128	Adults	All	1	Not specified		0		0	Diagnosed/suspected COVID	Recruiting	2020-03-15	ChiCTR	Exocarpium Citri Grandis Relieves Symptoms of Novel Coronavirus Pneunomia (COVID-19): a Randomized Controlled Clinical Trial	Exocarpium Citri Grandis Relieves Sympto	Confirmed	Exocarpium Citri Grandis Group:Oral Administration of Exocarpium Citri Grandis Phlegm Cough Solution;Placebo Group:Oral Administration of Placebo;	Hu Linhui	TCM	TCM	Cough Score	hulinhui@live.cn	+86 13580013426	Maoming People's Hospital	Parallel	Novel Coronavirus Pneumonia (COVID-19)	Interventional	16 March 2020	Inclusion	Unconventional medicine	TCM extract of C. grandis			Maoming People's Hospital	20200315	4/7/2020 10:40:56 AM	No	18	75
ChiCTR2000030779	453	276	http://www.chictr.org.cn/showproj.aspx?proj=50973	Inclusion	1		Ulinastatin	Other	Asia	China	100	N/A	All	1	Not specified		0		1	Hospitalised/Severe/ICU	Recruiting	2020-03-14	ChiCTR	A clinical trial for Ulinastatin Injection in the treatment of patients with severe novel coronavirus pneumonia (COVID-19)	A clinical trial for Ulinastatin Injecti	Severe	Experimental group:Conventional treatent and Ulinastatin;Control group:Conventional treatent ;	Zhaofen Lin,Wansheng Chen,Weifen Xie	Other	Ulinastatin	SOFA score	linzhaofen@sina.com	+86 13601605100, 13301833859, 13701682806	Shanghai Changzheng Hospital	Parallel	Novel Coronavirus Pneumonia (COVID-19)	Interventional	16 March 2020	Inclusion	Antiinflammatory	Urin trypsin inhibitor			Shanghai Changzheng Hospital	20200314	4/7/2020 10:40:56 AM	No
ChiCTR2000030759	454	277	http://www.chictr.org.cn/showproj.aspx?proj=49284	Inclusion	1		TCM	UCM	Asia	China	70	N/A	All	N/A	Not specified		0		0	Diagnosed/suspected COVID	Not Recruiting	2020-03-13	ChiCTR	Study for the therapeutic effect and mechanism of traditional Chinese medicine in the treatment of novel coronavirus pneumonia (COVID-19)	Study for the therapeutic effect and mec	Pneumonia	control group:Routine supportive treatment;experimental group:TCM decoction intervention + routine supportive treatment;	Jing-Guo Cheng	TCM	TCM	Incidence of deterioration	wzwsjcjg@126.com	+86 13857797188	WenZhou Medical University	Parallel	Novel Coronavirus Pneumonia (COVID-19)	Interventional	16 March 2020	Inclusion	Unconventional medicine	TCM			The First Affiliated Hospital of Wenzhou Medical University	20200313	4/7/2020 10:40:56 AM	No
ChiCTR2000030750	458	278	http://www.chictr.org.cn/showproj.aspx?proj=50928	Inclusion	1		Vaccine	Vaccine	Asia	China	120	Adults	All	2	Not specified		0		0	Prevention	Not Recruiting	2020-03-13	ChiCTR	A clinical study for effectiveness and safety evaluation for recombinant chimeric COVID-19 epitope DC vaccine in the treatment of novel coronavirus pneumonia	A clinical study for effectiveness and s	Prevention	common type :Immunotherapy with recombinant chimeric DC vaccine;Latent period group:Immunotherapy with recombinant chimeric DC vaccine;Normal control group:Immunotherapy with recombinant chimeric DC vaccine;Blank vaccine control group:0.9%NS;	Zhenlin Zhao	Vaccine	Vaccine	Antipyretic rate	zhaozl2006@163.com	+86 13828895409	Shenzhen Ruipuxun Academy for Stem Cell & Regenerative Medicine	Parallel	Novel Coronavirus Pneumonia (COVID-19)	Interventional	16 March 2020	Inclusion	Vaccination	DC vaccine			Shenzhen Third People's Hospital	20200313	4/7/2020 10:40:56 AM	No	25	65
ChiCTR2000030720	459	279	http://www.chictr.org.cn/showproj.aspx?proj=50793	Inclusion	1		TCM	UCM	Asia	China	120	Adults	All	N/A	Not specified		0		0	Diagnosed/suspected COVID	Recruiting	2020-03-11	ChiCTR	Prognosis Investigation and Intervention Study on Patients with novel coronavirus pneumonia (COVID-19) in recovery period Based on Community Health Management	Prognosis Investigation and Intervention	Pneumonia	Group 2:Western medicine conventional treatment;Group 1:TCM treatment;	Xiaodong Li	TCM	TCM	imaging improvement	lixiaodong555@126.com	+86 13908658127	Hubei Provincial Hospital of TCM	Parallel	Novel Coronavirus Pneumonia (COVID-19)	Interventional	16 March 2020	Inclusion	Unconventional medicine	TCM			Hubei Provincial Hospital of TCM	20200311	4/7/2020 10:40:56 AM	No	18	65
ChiCTR2000030701	462	280	http://www.chictr.org.cn/showproj.aspx?proj=50795	Inclusion	1		Enoxaparin	Anticoagulants	Asia	China	60	Adults	All	N/A	Open label		0		0	Mild/moderate	Not Recruiting	2020-03-10	ChiCTR	A randomized, parallel controlled open-label trial for the efficacy and safety of Prolongin (Enoxaparin Sodium Injection) in the treatment of adult patients with novel coronavirus pneumonia (COVID-19)	A randomized, parallel controlled open-l	Mild	experimental group:Based on the standard treatment recommended in the guidelines, a combination of Prolongin (Enoxaparin Sodium Injection) was used.;control group:Follow the guidelines for standard treatment.;	Cai Qingxian	AT	Enoxaparin	Time to Virus Eradication	41180423@qq.com	+86 13760857996	The Third People's Hospital of Shenzhen	Parallel	Novel Coronavirus Pneumonia (COVID-19)	Interventional	16 March 2020	Inclusion	Antithrombotic	Enoxaparin			The Third People's Hospital of Shenzhen	20200310	4/7/2020 10:40:56 AM	No	18
ChiCTR2000030702	463	281	http://www.chictr.org.cn/showproj.aspx?proj=50537	Inclusion	1		Convalescent Plasma	Antibodies	Asia	China	50	Adults	All	N/A	Open label		1	1	1	Hospitalised/Severe/ICU	Recruiting	2020-03-10	ChiCTR	Plasma of the convalescent in the treatment of novel coronavirus pneumonia (COVID-19) common patient: a prospective clinical trial	Plasma of the convalescent in the treatm	Hospitalised	eperimental group:Conventional treatment and convalescent plasma therapy;control group:conventional treatment;	Cao Bin	IT	Plasma	Time to clinical recovery	caobin_ben@163.com	+86 13911318339	China-Japan Friendship Hospital	Parallel	Novel Coronavirus Pneumonia (COVID-19)	Interventional	16 March 2020	Inclusion	Plasma treatment	Plasma			China-Japan friendship hospital	20200310	4/7/2020 10:40:56 AM	No	18	-
ChiCTR2000030700	464	282	http://www.chictr.org.cn/showproj.aspx?proj=50786	Inclusion	1		Enoxaparin	Anticoagulants	Asia	China	60	Adults	All	N/A	Open label		0		0	Mild/moderate	Not Recruiting	2020-03-10	ChiCTR	Study for the efficacy and safety of Prolongin (Enoxaparin Sodium Injection) in treatment of novel coronavirus pneumonia (COVID-19) adult common patients	Study for the efficacy and safety of Pro	Mild	experimental group:Based on the standard treatment recommended in the guidelines, a combination of Prolongin (Enoxaparin Sodium Injection) was used.;control group:Follow the guidelines for standard treatment.;	Zhang Yu	AT	Enoxaparin	Time to Virus Eradication	whxhzy@163.com	+86 13971292838	Union Hospital affiliated to Tongji Medical College of Huazhong University of Science and Technology	Parallel	Novel Coronavirus Pneumonia (COVID-19)	Interventional	16 March 2020	Inclusion	Antithrombotic	Enoxaparin			Union Hospital affiliated to Tongji Medical College of Huazhong University of Science and Technology	20200310	4/7/2020 10:40:56 AM	No	18
ChiCTR2000030703	465	283	http://www.chictr.org.cn/showproj.aspx?proj=50251	Inclusion	1		Ixekizumab	Other immunotherapeutics	Asia	China	40	Adults	All	N/A	Single blind		0		1	Diagnosed/suspected COVID	Recruiting	2020-03-10	ChiCTR	A randomized, blinded, controlled, multicenter clinical trial to evaluate the efficacy and safety of Ixekizumab combined with conventional antiviral drugs in patients with novel coronavirus pneumonia (COVID-19)	A randomized, blinded, controlled, multi	Pneumonia	experimental group:Ixekizumab and antiviral therapy;control group:antiviral therapy;	Pinhua Pan, Yehong Kuang	IT	Ixekizumab	Lung CT	pinhuapan668@126.com	+86 13574171102	Xiangya Hospital of Central South University	Parallel	Novel Coronavirus Pneumonia (COVID-19)	Interventional	16 March 2020	Inclusion	Antiviral	Ixekizumab			Xiangya Hospital of Central South University	20200310	4/7/2020 10:40:56 AM	No	18	75
ChiCTR2000030545	466	284	http://www.chictr.org.cn/showproj.aspx?proj=50126	Inclusion	1		TCM	UCM	Asia	China	300	Adults	All	1	Not specified		0		1	Diagnosed/suspected COVID	Recruiting	2020-03-06	ChiCTR	Efficacy and safety of honeysuckle oral liquid in the treatment of novel coronavirus pneumonia (COVID-19): a multicenter, randomized, controlled, open clinical trial	Efficacy and safety of honeysuckle oral	Pneumonia	Control group:Basic treatment refers to the treatment according to the diagnosis and treatment plan of the health care Commission (Sixth Edition). (after three days of medication, if the symptoms cannot be controlled in time and effectively, the patients can be sent out of the group immediately to receive the treatment&#;Experimental group 1:Basic treatment + honeysuckle oral liquid at a low dose…	Yang Yi	TCM	TCM	Recovery time	153267742@qq.com	+86 18971163518	Hubei Hospital of Traditional Chinese Medicine	Parallel	Novel Coronavirus Pneumonia (COVID-19)	Interventional	16 March 2020	Inclusion	Unconventional medicine	TCM			Hubei Hospital of Traditional Chinese Medicine	20200306	4/7/2020 10:40:56 AM	No	18	75
ChiCTR2000030580	467	285	http://www.chictr.org.cn/showproj.aspx?proj=50693	Inclusion	1		Tocilizumab/adamumab	Other immunotherapeutics	Asia	China	60	Adults	All	1	Not specified		0		0	Hospitalised/Severe/ICU	Recruiting	2020-03-08	ChiCTR	Efficacy and safety of tozumab combined with adamumab(Qletli) in severe and critical patients with novel coronavirus pneumonia (COVID-19)	Efficacy and safety of tozumab combined	Severe	experimental group:Based on the standard treatment recommended in the guidelines, a combination of tozumab and adamumab was used;control group:Follow the guidelines for standard treatment;	Min Zhang	IT	tozumab/adamumab	CT-scan findings	maggie_zhangmin@163.com	+86 18121288279	Shanghai General Hospital	Parallel	Novel Coronavirus Pneumonia (COVID-19)	Interventional	16 March 2020	Inclusion	Antiviral	Tozumab adamumab			Shanghai General Hospital	20200308	4/7/2020 10:40:56 AM	No	18	80
ChiCTR2000030388	474	286	http://www.chictr.org.cn/showproj.aspx?proj=50306	Inclusion	1		TCM	UCM	Asia	China	60	Adults	All	N/A	Not specified	1	0	1	0	Hospitalised/Severe/ICU	Recruiting	2020-03-01	ChiCTR	Efficacy and safety of Xue-Bi-Jing injection in the treatment of severe cases of novel coronavirus pneumonia (COVID-19)	Efficacy and safety of Xue-Bi-Jing injec	Severe	Experimental group:On the basis of routine treatment, add 100ml of normal saline and 50ml of Xuebijing injection twice a day;;Control group:conventional therapy;	xiao wei	TCM	TCM	Mortality	99xw@sina.com	+86 071 68494565	Jingzhou First People's Hospital	Parallel	Novel coronavirus pneumonia (COVID-19)	Interventional	16 March 2020	Inclusion	Unconventional medicine	TCM			Jingzhou First People's Hospital	20200301	4/7/2020 10:40:56 AM	No	18	80
ChiCTR2000030187	481	287	http://www.chictr.org.cn/showproj.aspx?proj=50057	Inclusion	1		Ritonavir/Lopinavir	Antiviral	Asia	China	60	Adults	All	N/A	Not specified	1	0	1	0	Diagnosed/suspected COVID	Recruiting	2020-02-24	ChiCTR	Clinical study for Lopinavir and Ritonavir in the treatment of novel coronavirus pneumonia (COVID-19)	Clinical study for Lopinavir and Ritonav	Confirmed	Experimental group:Lopinavir and Ritonavir Tablets;control group:Routine symptomatic support treatment;	Wei Xiao	AV	Ritonavir/Lopinavir	Mortality	99xw@sina.com	+86 18972161798	Jingzhou First People's Hospital	Parallel	Novel coronavirus pneumonia (COVID-19)	Interventional	16 March 2020	Inclusion	Antiviral				Jingzhou First People's Hospital	20200224	4/7/2020 10:40:56 AM	No	18	80
ChiCTR2000031138	491	288	http://www.chictr.org.cn/showproj.aspx?proj=51416	Inclusion	1		Pirfenidone	Antiinflammatory	Asia	China	40	N/A	All	N/A	Not specified		0		0	Hospitalised/Severe/ICU	Recruiting	2020-03-22	ChiCTR	Prospective exploratory clinical research on the efficacy and safety of pirfenidone capsules in the treatment of severe novel coronavirus pneumonia (COVID-19)	Prospective exploratory clinical researc	Severe	Pirfenidone group:Support treatment with oral taken Pirfenidone capsule;Support treatment group:Support treatment ;	Meng Jie	AI	Pirfenidone	HRCT score	mengjie@csu.edu.cn	+86 13607492399	The Third Xiangya Hospital of Central South University	Parallel	Severe COVID-19	Interventional	23 March 2020	Inclusion	Antiinflammatory	Pirfenidone			The third xiangya hospital of Central South University	20200322	4/7/2020 10:40:56 AM	No
ChiCTR2000030987	495	289	http://www.chictr.org.cn/showproj.aspx?proj=51329	Inclusion	1		Chloroquine	Antimalaria	Asia	China	150	Adults	Male	3	Not specified		0		0	Diagnosed/suspected COVID	Recruiting	2020-03-20	ChiCTR	A Randomized Controlled Trial for Favipiravir Tablets Combine With Chloroquine Phosphate in the Treatment of Novel Coronavirus Pneumonia (COVID-19)	A Randomized Controlled Trial for Favipi	Confirmed	Experimental group 1:the oral trial drug favipiravir tablets plus chloroquine phosphatetablets tablets group;Experimental group 2:the oral trial drug favipiravir tablets;Control group:the oral placebo treatment;	Zhaohui Tong	AM	Chloroquine	Recovery of respiratory symptoms	tongzhaohuicy@sina.com	+86 13910930309	Beijing Chao-yang Hospital, Capital Medical University	Parallel	Novel Coronavirus Pneumonia (COVID-19)	Interventional	23 March 2020	Inclusion	Antiviral + antimalaria	Favipiravir + chloroquine			Beijing Chao-yang Hospital, Capital Medical University	20200320	4/7/2020 10:40:56 AM	No	18	75
ChiCTR2000030996	496	290	http://www.chictr.org.cn/showproj.aspx?proj=51349	Inclusion	1		TCM	UCM	Asia	China	60	Adults	All	N/A	Not specified		0		0	Diagnosed/suspected COVID	Recruiting	2020-03-20	ChiCTR	Effect of Auricular point pressing on insomnia of novel coronavirus pneumonia (COVID-19) patients: a randomized controlled trial.	Effect of Auricular point pressing on in	Confirmed	Experimental group:normal treatment and auricular point pressing;control group:normal treatment;	Jing Li	TCM	TCM	insomnia	xyyylijing@sina.com	+86 15901203883	Nursing Department of Xiyuan Hospital, Chinese Academy of Traditional Chinese Medicine	Parallel	novel coronavirus pneumonia (COVID-19)	Interventional	23 March 2020	Inclusion	Unconventional medicine	Acupuncture			Xiyuan Hospital, Chinese Academy of Traditional Chinese Medicine	20200320	4/7/2020 10:40:56 AM	No	33	75
ChiCTR2000030933	499	291	http://www.chictr.org.cn/showproj.aspx?proj=51184	Inclusion	1		TCM	UCM	Asia	China	108	Adults	All	N/A	Open label		0		0	Diagnosed/suspected COVID	Not Recruiting	2020-03-18	ChiCTR	Effectiveness of ''Liu-Zi-Jue'' combined with respiratory muscle training for respiratory function in novel coronavirus pneumonia (COVID-19) patients: a randomized controlled trial	Effectiveness of ''Liu-Zi-Jue'' combined	Confirmed	Group 1:Liuzijue exercise;Group 2:Respiratory muscle training;Group 3:Liuzijue exercise combined with respiratory muscle training;	Feng Zhen	TCM	TCM	Maximal inspiratory pressure	fengzhenly@sina.com	+86 13970038111	The First Affiliated Hospital of Nanchang University	Parallel	Novel Coronavirus Pneumonia (COVID-19)	Interventional	23 March 2020	Inclusion	Unconventional	Lung exercises			The First Affiliated Hospital of Nanchang University	20200318	4/7/2020 10:40:56 AM	No	18	75
ChiCTR2000030944	500	292	http://www.chictr.org.cn/showproj.aspx?proj=50199	Inclusion	1		Stem Cells	Stem cells	Asia	China	20	Both	All	1	Open label	1	0	1	0	Hospitalised/Severe/ICU	Not Recruiting	2020-03-18	ChiCTR	Clinical study of human NK cells and MSCs transplantation for severe novel coronavirus pneumonia (COVID-19)	Clinical study of human NK cells and MSC	Severe	Experimental group:On the basis of the current clinical treatment of SNCP, NK cells and MSCs were increased;Control group:current clinical treatment of SNCP;	Ye Xiaoqun	SC	Stem Cells	Mortality	511201663@qq.com	+86 0791 86300047	The Second Affiliated Hospital of Nanchang University	Parallel	Novel Coronavirus Pneumonia (COVID-19)	Interventional	23 March 2020	Inclusion	Stem Cells	NK and MSCs transplantation			The Second Affiliated Hospital of Nanchang University	20200318	4/7/2020 10:40:56 AM	No	4	80
ChiCTR2000030929	501	293	http://www.chictr.org.cn/showproj.aspx?proj=50696	Inclusion	1		Convalescent Plasma	Antibodies	Asia	China	60	Adults	All	N/A	Double blind		1	1	0	Hospitalised/Severe/ICU	Not Recruiting	2020-03-17	ChiCTR	A randomized, double-blind, parallel-controlled trial to evaluate the efficacy and safety of anti-SARS-CoV-2 virus inactivated plasma in the treatment of severe novel coronavirus pneumonia (COVID-19)	A randomized, double-blind, parallel-con	Severe	Experimental group:Anti-SARS-CoV-2 virus inactivated plasma;Control group:Ordinary plasma;	Binghong Zhang	IT	plasma	Improvement of clinical symptoms	zbhong6288@163.com	+86 13886009855	Renmin Hospital of Wuhan University	Parallel	Novel Coronavirus Pneumonia (COVID-19)	Interventional	23 March 2020	Inclusion	Plasma treatment				Renmin Hospital of Wuhan University	20200317	4/7/2020 10:40:56 AM	No	18	70
ChiCTR2000029868	504	294	http://www.chictr.org.cn/showproj.aspx?proj=49524	Inclusion	1		Chloroquine	Antimalaria	Asia	China	360	Adults	All	1	Not specified		0		1	Diagnosed/suspected COVID	Completed	2020-02-15	ChiCTR	Hydroxychloroquine treating novel coronavirus pneumonia (COVID-19): a randomized controlled, open label, multicenter trial	Hydroxychloroquine treating novel corona	Pneumonia	Experimental group:oral hydroxychloroquine sulfate tablets;Control group:Conventional treatment meet the Guideline;	Guochao Shi	AM	Chloroquine	Viral nucleic acid test	shi_guochao2010@qq.com	+86 13918462035	Ruijin Hospital, Shanghai Jiaotong University School of Medicine	Parallel	Novel Coronavirus Pneumonia (COVID-19)	Interventional	23 March 2020	Inclusion	Antimalaria	Chloroquine			Ruijin Hospital, Shanghai Jiaotong University School of Medicine	20200215	4/7/2020 10:40:56 AM	No	18
ChiCTR2000030922	505	295	http://www.chictr.org.cn/showproj.aspx?proj=51141	Inclusion	1		Interferon A+ribavirin/Umifenovir+ribavirin	Other drug combinations	Asia	China	30	Adults	All	N/A	Not specified	1	0	1	1	Diagnosed/suspected COVID	Recruiting	2020-03-17	ChiCTR	Prospective, open-label, controlled, multicenter cohort study of long-acting interferon plus ribavirin in patients with novel coronavirus pneumonia (COVID-19)	Prospective, open-label, controlled, mul	Confirmed	A:Long-acting interferon alpha-2a (135ug) + ribavirin;B:Abidol + ribavirin;	Bin Zhang/Yinong Ye	AV/IT	INF-alpha+ribavirin/Abidol+ribavirin	Mortality	FSYYN001@126.com	+86 18038860666	Department of Infectious Diseases, Foshan First People's Hospital	Parallel	Novel Coronavirus Pneumonia (COVID-19)	Interventional	23 March 2020	Inclusion	AV	Interferon, ribavirin, abidol			Foshan First People's Hospital	20200317	4/7/2020 10:40:56 AM	No	18	65
ChiCTR2000030254	506	296	http://www.chictr.org.cn/showproj.aspx?proj=50137	Inclusion	1		Favipiravir/Umifenovir	Antiviral	Asia	China	240	Adults	All	N/A	Not specified		1	1	1	Hospitalised/Severe/ICU	Completed	2020-02-26	ChiCTR	the Efficacy and Safety of Favipiravir for novel coronavirus–infected pneumonia: A multicenter, randomized, open, positive, parallel-controlled clinical study	the Efficacy and Safety of Favipiravir f	Hospitalised	Experimental group:Farpiravir tablets;Control group:Abidole tablets;	Xinghuan Wang	AV	Favipiravir/Abidole	Clinical recovery rate	wangxinghuan@whu.edu.cn	+86 027 67813096	Zhongnan Hospital of Wuhan University	Parallel	Novel Coronavirus Pneumonia (COVID-19)	Interventional	23 March 2020	Inclusion	AV	Favipiravir, abidole			Zhongnan Hospital of Wuhan University	20200226	4/7/2020 10:40:56 AM	No	18	100
ChiCTR2000029658	507	297	http://www.chictr.org.cn/showproj.aspx?proj=49074	Inclusion	1		high-flow therapy by nasal cannulae (HFNC)	Respiratory adjuncts (ventilator / gas)	Asia	China	60	Adults	All	N/A	Not specified		1	1	0	Hospitalised/Severe/ICU	Not Recruiting	2020-02-09	ChiCTR	Nasal high-fow preoxygenation assisted fibre-optic bronchoscope intubation in patients with critical novel coronavirus pneumonia (COVID-19)	Nasal high-fow preoxygenation assisted f	ICU	experimental group:high-fow therapy by nasal cannulae (HFNC);control group:bag- valve mask oxygenation (SMO);	Li Bixi	AT	high-fow therapy by nasal cannulae (HFNC)	lowest SpO2 during intubation	bxlee@sohu.com	+86 13397192089	Central Theater General Hospital of PLA	Parallel	novel coronavirus pneumonia (COVID-19)	Interventional	23 March 2020	Inclusion	Adjunctive therapy	Highdose oxygen			Central Theater General Hospital of PLA	20200209	4/7/2020 10:40:56 AM	No	18	80
ChiCTR2000029573	508	298	http://www.chictr.org.cn/showproj.aspx?proj=49065	Inclusion	1		Novaferon atomization/TCM?	Other immunotherapeutics	Asia	China	48	N/A	All	1	Open label		1	1	1	Diagnosed/suspected COVID	Recruiting	2020-02-05	ChiCTR	A multicenter, randomized, open, controlled clinical study to evaluate the efficacy and safety of recombinant cytokine gene-derived protein injection in combination with standard therapy in patients with novel coronavirus infection	A multicenter, randomized, open, control	Confirmed	Mild Type Group A:antiviral therapy and Chinese medicine treatment;Mild Type Group B:antiviral therapy, Chinese medicine treatment, and Novaferon atomization;Common and Heavy Type Group C:antiviral therapy and Chinese medicine treatment;Common and Heavy Type Group C:antiviral therapy, Chinese medicine treatment, and Novaferon atomization;	Li Lanjuan	IT	Novaferon atomization/TCM?	RNA Yin conversion	ljli@zju.edu.cn	+86 13906514210	The First Affiliated Hospital of Medical College of Zhejiang University	Parallel	novel coronavirus pneumonia	Interventional	23 March 2020	Inclusion	AV	Novaferon og ukendt AV			The First Affiliated Hospital of Medical College of Zhejiang University	20200205	4/7/2020 10:40:56 AM	No
ChiCTR2000029496	510	299	http://www.chictr.org.cn/showproj.aspx?proj=48809	Inclusion	1		Novaferon	Other immunotherapeutics	Asia	China	90	Adults	All	1	Not specified		0		0	Diagnosed/suspected COVID	Recruiting	2020-02-03	ChiCTR	A randomized, open label, parallel controlled trial of evaluating the efficacy of recombinant cytokine gene-derived protein injection for clearing novel coronavirus in patients with novel coronavirus pneumonia (COVID-19)	A randomized, open label, parallel contr	Confirmed	Intervention A:On the basis of routine medical treatment, the patients were given Novaferon Atomization inhalation, 20ug each time, twice a day, 7-14 days.;intervention B:On the basis of routine medical treatment, the patients were given lopinavir / ritonavir tablets (Kaletra) twice a day, twice each time, 7-14 days.;intervention C:On the basis of routine medical treatment, combined with Novafron…	Gong Guozhong	IT	Novaferon	coronavirus nucleic acid clearance rate	gongguozhong@csu.edu.cn	+86 13873104819	The Second Xiangya Hospital of Cental South University	Parallel	Novel Coronavirus Pneumonia (COVID-19)	Interventional	23 March 2020	Inclusion	AV	Novaferon			The First Hospital of Changsha; The Second Xiangya Hospital of Central South University	20200203	4/7/2020 10:40:56 AM	No	18	70
ChiCTR2000031319	511	300	http://www.chictr.org.cn/showproj.aspx?proj=51647	Inclusion	1		Stem Cells	Stem cells	Asia	China	20	Adults	All	N/A	Not specified		0		0	Hospitalised/Severe/ICU	Not Recruiting	2020-03-27	ChiCTR	Safety and Efficacy Study of Allogeneic Human Dental Pulp Mesenchymal Stem Cells to Treat Severe novel coronavirus pneumonia (COVID-19) patients	Safety and Efficacy Study of Allogeneic	Severe	hDPSCs group:Routine treatment + Intravenous injection of human dental pulp stem cells;Control group:Routine treatment + Placebo;	Prof. Qingsong Ye; Dr. Chenliang Zhou	SC	Stem Cells	TTCI	20215851@qq.com	+86 027 88041919-83920	Center for Regenerative Medicine, Renmin Hospital of Wuhan University	Parallel	Novel Coronavirus Pneumonia (COVID-19)	Interventional	30 March 2020	Inclusion	Stem Cells				Renmin Hospital of Wuhan University	20200327	4/7/2020 10:40:56 AM	No	18	65
ChiCTR2000031271	513	301	http://www.chictr.org.cn/showproj.aspx?proj=51194	Inclusion	1		Nutrtion/Amino Acids	Dietary supplements	Asia	China	80	Adults	All	N/A	Not specified	1	0	1	0	Diagnosed/suspected COVID	Not Recruiting	2020-03-26	ChiCTR	Metabolic abnormalities and rearrangement reversal treatment of patient with novel coronavirus pneumonia (COVID-19)	Metabolic abnormalities and rearrangemen	Pneumonia	Control group:regular treatment;Experimental group:Compound amino acid combined with routine treatment;	Zhuang-Gui Chen	Dietary supplements	Nutrtion/Amino Acids	death ratio	chenzhuanggui@126.com	+86 13600009221	Department of Pediatrics, The Third Affiliated Hospital of Sun Yat-sen University	Parallel	Novel Coronavirus Pneumonia (COVID-19)	Interventional	30 March 2020	Inclusion	Nutrition	Amino acids			The Third Affiliated Hospital of Sun Yat-sen University	20200326	4/7/2020 10:40:56 AM	No	18	65
ChiCTR2000031203	515	302	http://www.chictr.org.cn/showproj.aspx?proj=51030	Inclusion	1		TCM	UCM	Asia	China	28	Adults	All	N/A	Not specified		0		0	Diagnosed/suspected COVID	Recruiting	2020-03-24	ChiCTR	Study for the effect of Moxibustion Guidance and Intervention based on internet for the discharged patients with novel coronavirus pneumonia (COVID-19)	Study for the effect of Moxibustion Guid	Rehabilitation	1:Blank;2:Moxibustion treatment;	Fu Liran	TCM	TCM	TCM Syndrome Scale	fuliran@126.com	+86 15837117112	Zhengzhou People's Hospital	Parallel	Novel Coronavirus Pneumonia (COVID-19)	Interventional	30 March 2020	Inclusion	Unconventional medicine	Moxibustion			Zhengzhou People's Hospital	20200324	4/7/2020 10:40:56 AM	No	18	75
ChiCTR2000031204	516	303	http://www.chictr.org.cn/showproj.aspx?proj=49420	Inclusion	1		Chloroquine	Antimalaria	Asia	China	300	N/A	All	1	Single blind		0		1	Diagnosed/suspected COVID	Recruiting	2020-03-24	ChiCTR	A multicenter, single-blind, randomized controlled clinical trial for chloroquine phosphate in the treatment of novel coronavirus pneumonia (COVID-19)	A multicenter, single-blind, randomized	Pneumonia	Experimental treatment group:Oral chloroquine phosphate tablets (treatment group);control group:Oral placebo group (control group);	Jin Ronghua	AM	Chloroquine	Clearance time of virus RNA	jin_eagle@sina.com	+86 13901374552	Beijing You'an Hospital, Capital Medical University	Parallel	Novel Coronavirus Pneumonia (COVID-19)	Interventional	30 March 2020	Inclusion	Antimalaria	Chloroquine			Beijing you'an Hospital, Capital Medical University	20200324	4/7/2020 10:40:56 AM	No
ChiCTR2000030937	518	304	http://www.chictr.org.cn/showproj.aspx?proj=51240	Inclusion	1		TCM	UCM	Asia	China	144	Adults	All	1	Open label		0		0	Diagnosed/suspected COVID	Recruiting	2020-03-18	ChiCTR	A randomized, open-label, controlled trial for Gu-Shen Ding-Chuan-Wan in the treatment of patients with novel coronavirus pneumonia (COVID-19) at recovery phase with Fei-Pi-Qi-Xu Zhen	A randomized, open-label, controlled tri	Rehabilitation	Experimental group:On the basis of rehabilitation treatment, the subjects in the experimental group take Gu-Shen Ding-Chuan-Wan;Control group:standard treatment;	Li Shi-yue	TCM	TCM	change of TCM syndrome	lishiyue@188.com	+86 13902233925	the First Affiliated Hospital of Guangzhou Medical University	Parallel	Novel Coronavirus Pneumonia (COVID-19)	Interventional	30 March 2020	Inclusion	Unconventional medicine	TCM			The First Affiliated Hospital of Guangzhou Medical University	20200318	4/7/2020 10:40:56 AM	No	18
ChiCTR2000030988	520	305	http://www.chictr.org.cn/showproj.aspx?proj=51317	Inclusion	1		TCM	UCM	Asia	China	204	Adults	All	N/A	Open label		0		0	Diagnosed/suspected COVID	Not Recruiting	2020-03-20	ChiCTR	A RCT for Hua-Shi Bai-Du granules in patients with novel coronavirus pneumonia (COVID-19)	A RCT for Hua-Shi Bai-Du granules in pat	Confirmed	Experimental group:Hua-Shi Bai-Du granules;control group:conventional treatment of western medicine;	Zhongde Zhang	TCM	TCM	Inflammation absorption on Chest CT	doctorzzd99@163.com	+86 13903076359	Guangdong Provincial Hospital of Chinese Medicine	Parallel	Novel Coronavirus Pneumonia (COVID-19)	Interventional	30 March 2020	Inclusion	Unconventional medicine	TCM			Guangdong Provincial Hospital of Chinese Medicine	20200320	4/7/2020 10:40:56 AM	No	18	85
ChiCTR2000030923	521	306	http://www.chictr.org.cn/showproj.aspx?proj=51139	Inclusion	1		TCM	UCM	Asia	China	400	Both	All	N/A	Open label		0		0	Diagnosed/suspected COVID	Recruiting	2020-03-17	ChiCTR	The treatment and diagnosis plan of integrated traditional Chinese and Western medicine for novel coronavirus pneumonia (COVID-19)	The treatment and diagnosis plan of inte	Suspected	Suspected case treatment group:TCM formula 1 or TCM formula 2;Suspected case control group:null;Confirmed case treatment group:Western medicine+(TCM formula 3 or TCM formula 4 or TCM formula 5 or TCM formula 6);Confirmed case control group:Western medicine;	Lei Genping	TCM	TCM	Incidence of COVID-19 pneumonia	leigenping2006@163.com	+86 13609219205	Affiliated Hospital of Shaanxi University of Traditional Chinese Medicine	Parallel	Novel Coronavirus Pneumonia (COVID-19)	Interventional	30 March 2020	Inclusion	Unconventional medicine	TCM			Affiliated Hospital of Shaanxi University of Traditional Chinese Medicine	20200317	4/7/2020 10:40:56 AM	No	0	No limit
ChiCTR2000030288	522	307	http://www.chictr.org.cn/showproj.aspx?proj=50202	Inclusion	1		TCM	UCM	Asia	China	204	Adults	All	N/A	Open label		0		0	Diagnosed/suspected COVID	Recruiting	2020-02-27	ChiCTR	Efficacy of Traditional Chinese Medicine in the Treatment of Novel Coronavirus Pneumonia (COVID-19): a Randomized Controlled Trial	Efficacy of Traditional Chinese Medicine	Confirmed	experimental group:TCM formula and general treatment based on "Diagnosis and Treatment Program for COVID-19" (trial version 6th);control group:general treatment based on "Diagnosis and Treatment Program for COVID-19" (trial version 6th);	Huang Luqi; Ruan Lianguo	TCM	TCM	Time to 2019-nCoV RNA negativity	huangluqi01@126.com	+86 010-64089801	China Academy of Chinese Medical Sciences	Parallel	Novel Coronavirus Pneumonia (COVID-19)	Interventional	30 March 2020	Inclusion	Unconventional medicine	TCM			China Academy of Chinese Medical Sciences	20200227	4/7/2020 10:40:56 AM	No	18	75
ChiCTR2000030704	523	308	http://www.chictr.org.cn/showproj.aspx?proj=50778	Inclusion	1		TCM	UCM	Asia	China	50	Both	All	1	Not specified		0		0	Hospitalised/Severe/ICU	Not Recruiting	2020-03-10	ChiCTR	Observation Of Clinical Efficacy And Safety Of Bufonis Venenum Injection In The Treatment Of Severe Novel Coronavirus Pneumonia (COVID-19)	Observation Of Clinical Efficacy And Saf	Severe	Experimental group:Bufonis venenum injection;Control group:0.9% N.S.;	Hu Xingxing	TCM	TCM	PO2/FiO2	huxingxing82@163.com	+86 17327006987	Jiangsu Provincial Hospital of Integrated Traditional Chinese and Western Medicine	Cross-over	Novel Coronavirus Pneumonia (COVID-19)	Interventional	30 March 2020	Exclusion	Unconventional medicine	Bufonis (antiinflammation/pain treatment) /CROSS OVER study, randomization not mentioned			The First People's Hospital of Jiangxia District, Wuhan	20200310	4/7/2020 10:40:56 AM	No	7	90
ChiCTR2000030028	524	309	http://www.chictr.org.cn/showproj.aspx?proj=49840	Inclusion	1		PD-1 mAb(Monoclonal antibodies)	Other immunotherapeutics	Asia	China	40	Adults	All	N/A	Not specified		0		0	Hospitalised/Severe/ICU	Not Recruiting	2020-02-20	ChiCTR	Clinical comparative study of PD-1 mAb in the treatment of severe and critical patients with novel coronavirus pneumonia (COVID-19)	Clinical comparative study of PD-1 mAb i	Severe	Experimental group:PD-1 mAb + Standard treatment;Control group:Standard treatment;	Yan Kang	IT	PD-1 mAb(Monoclonal antibodies)	Neutrophil count	kangyan_hx@163.com	+86 18980601556	West China Hospital, Sichuan University	Parallel	novel coronavirus disease (COVID-19)	Interventional	30 March 2020	Inclusion	Anticancer drugs	PD-1 mAb			West China Hospital	20200220	4/7/2020 10:40:56 AM	No	18
ChiCTR2000030198	525	310	http://www.chictr.org.cn/showproj.aspx?proj=50066	Inclusion	1		Pulmonary rehabilitation	Respiratory adjuncts (ventilator / gas)	Asia	China	60	N/A	All	N/A	Not specified		0		0	Diagnosed/suspected COVID	Not Recruiting	2020-02-25	ChiCTR	Clinical research of pulmonary rehabilitation in survivors due to severe or critial novel coronavirus pneumonia (COVID-19)	Clinical research of pulmonary rehabilit	Rehabilitation	experimental group:Health education+ pulmonary rehabilitation;control group:Health educatio;	Chengqi He	AT	pulmonary rehabilitation	pulmonary function	hxkfhcq@126.com	+86 18980601618	West China Hospital, Sichuan University	Parallel	Novel Coronavirus Pneumonia (COVID-19)	Interventional	30 March 2020	Inclusion	Adjunctive therapy	Pulmonary rehabilitation			West China Hospital of Sichuan University	20200225	4/7/2020 10:40:56 AM	No
ChiCTR2000029976	526	311	http://www.chictr.org.cn/showproj.aspx?proj=49631	Inclusion	1		TCM	UCM	Asia	China	80	Adults	All	N/A	Open label		0		0	Mild/moderate	Recruiting	2020-02-18	ChiCTR	The effect of Gymnastic Qigong Yangfeifang on functional recovery and quality of life in patients with mild novel coronavirus pneumonia (COVID-19)	The effect of Gymnastic Qigong Yangfeifa	Mild	experimental group:Fitness Qigong Yangfei prescription;control group:general advice and related psychological comfort.;	Shan Chunlei	TCM	TCM	Oxygen Inhalation Frequency	shanclhappy@163.com	+86 18616974986	Shanghai University of Traditional Chinese Medicine	Parallel	Novel Coronavirus Pneumonia (COVID-19)	Interventional	30 March 2020	Inclusion	Unconventional medicine	Gymnastic exercises			Shanghai University of Traditional Chinese Medicine	20200218	4/7/2020 10:40:56 AM	No	25	65
ChiCTR2000031453	530	312	http://www.chictr.org.cn/showproj.aspx?proj=51859	Inclusion	1		Nintedanib (tyrosine kinase)	Other	Asia	China	80	Adults	All	1	Not specified		0		0	Diagnosed/suspected COVID	Not Recruiting	2020-04-01	ChiCTR	Efficacy and safety of Nintedanib esilate soft capsules in the treatment of pulmonary fibrosis in healed moderate to severe patients of novel coronavirus pneumonia (COVID-19): a single-center, randomized, placebo-controlled trial	Efficacy and safety of Nintedanib esilat	Rehabilitation	Nintedanib group:Nintedanib;Control group:Placebo;	Xianglin Yuan	AT	Nintedanib (tyrosine kinase)	FVC	yuanxianglin@hust.edu.cn	+86 13667241722	Tongji Hospital of Tongji Medical College; Huazhong Science and Technology University	Parallel	Novel Coronavirus Pneumonia (COVID-19)	Interventional	6 April 2020	Inclusion	Anticancer drugs	Tyrokinase inhibitor (CBT-I)			Tongji Hospital of Tongji Medical College, Huazhong Science and Technology University	20200401	4/7/2020 10:40:56 AM	No	18	70
ChiCTR2000031454	535	313	http://www.chictr.org.cn/showproj.aspx?proj=51693	Inclusion	1		Chloroquine + other	Antimalaria_antiviral/antibiotic	Asia	China	56	Adults	All	N/A	Double blind		0		0	Prevention	Recruiting	2020-04-01	ChiCTR	Clinical study for prevention and treatment of digestive tract lesions caused by novel coronavirus pneumonia (COVID-19)	Clinical study for prevention and treatm	Prevention	experimental group:Rabeprazole plus chloroquine;control group :Lopinavir + rabeprazole;	Xiao Fei	AM/AV	Chloroquine;control/Lopinavir/Rabeprazole	2019-ncov nucleic acid yin rate	xiaof35@sysu.edu.cn	+86 13380600018	The Fifth Affiliated Hospital of Sun Yat-Sen University	Parallel	Novel Coronavirus Pneumonia (COVID-19)	Interventional	6 April 2020	Inclusion	Antimalaria	Chloroquine			Infection prevention and treatment center of The Fifth Affiliated Hospital of Sun Yat-Sen University	20200401	4/7/2020 10:40:56 AM	No	18	75
ChiCTR2000031672	536	314	http://www.chictr.org.cn/historyversionpuben.aspx?regno=ChiCTR2000031672	Inclusion	1		TCM	UCM	Asia	China	75	Adults	All	N/A	Not specified		0		0	Diagnosed/suspected COVID	Not Recruiting	2020-04-06	Xsearch ChiCTR	Development and application of TCM body regulating protection scheme for the convalescent population of novel coronavirus pneumonia (COVID-19)	Development and application of TCM body	Rehabilitation	Group 1:Xiaotan Sanjiefang granuleGroup 2 Placebo and 5% active drug	Yingshuai Li	TCM	TCM	Lung CT Score	liyingshuai2013@163.com	+86 13681410020	11 Beisanhuan Road East, Chaoyang District, Beijing, China	Parallel	Novel Coronavirus Pneumonia (COVID-19)	Interventional	8 April 2020										18	75
ChiCTR2000031174	537	315	http://www.chictr.org.cn/historyversionpuben.aspx?regno=ChiCTR2000031174	Inclusion	1		Chloroquine	Antimalaria	Asia	China	1000	Adults	All	N/A	Not specified		0		0	Prevention	Not Recruiting	2020-04-23	Xsearch ChiCTR	Effectiveness and safety of hydroxychloroquine sulfate in the preventive treatment of novel coronavirus pneumonia (COVID-19)	Effectiveness and safety of hydroxychlor	Prevention	Hydroxychloroquine	Xia Lu	AM	Chloroquine	COVID-19 Nucleic acid	hello0410@126.com	+86 18930811818	Shanghai Public Health Clinical Center	Parallel	Novel Coronavirus Pneumonia (COVID-19)	Interventional											18	70
NCT04333368	539	316	https://clinicaltrials.gov/ct2/show/NCT04333368	Inclusion	1		Stem cells	Stem cells	Europe	France	60	Adults	All	2	Triple blind		1	1	0	Hospitalised/Severe/ICU	Recruiting	2020-04-03	Xsearch NCT	Cell Therapy Using Umbilical Cord-derived Mesenchymal Stromal Cells in SARS-CoV-2-related ARDS	Cell Therapy Using Umbilical Cord-derive	Severe	UC-MSC (Umbilical Cord(UC)-Derived Mesenchymal Stem Cells(MSCs)) vs placebo	Antoine MONSEL	SC	UC-MSC (Umbilical Cord(UC)-Derived Mesenchymal Stem Cells(MSCs))	Respiratory efficacy evaluated by the increase in PaO2/FiO2 ratio from baseline to day 7	antoine.monsel@aphp.fr	184827399	Assitance Publique - Hôpitaux de Paris	Allocation: Randomized, Intervention Model: Parallel Assignment, Masking: Triple (Participant, Care Provider, Investigator)	Severe Acute Respiratory Syndrome Coronavirus 2	Interventional											18
NCT04329195	540	317	https://clinicaltrials.gov/ct2/show/NCT04329195	Inclusion	1		ACE inhibitor	Antihypertensiva	Europe	France	554	Adults	All	1	Open label		1	1	0	Hospitalised/Severe/ICU	Recruiting	2020-04-01	Xsearch NCT	ACE Inhibitors or ARBs Discontinuation in Context of SARS-CoV-2 Pandemic	ACE Inhibitors or ARBs Discontinuation i	Hospitalised	Discontinuation/continuation from ACE inhibitors	Gilles MONTALESCOT	AT	ACE inhibitors discontinuation/continuation	Time to clinical improvement from day 0 to day 28	gilles.montalescot@aphp.fr	+33 1 42 16 30 07	Assistance Publique - Hôpitaux de Paris	Randomized, parallel, open label	History of Cardiovascular Disease Treated With RAS Blockers and With SARS-CoV-2 Infection	Interventional											18
NCT04323527	541	318	https://clinicaltrials.gov/ct2/show/NCT04323527	Inclusion	1		Chloroquine	Antimalaria	South America	Brazil	440	Adults	All	1	Quadruple blind	1	0	1	0	Hospitalised/Severe/ICU	Recruiting	2020-03-26	Xsearch NCT	Chloroquine Diphosphate for the Treatment of Severe Acute Respiratory Syndrome Secondary to SARS-CoV2	Chloroquine Diphosphate for the Treatmen	Severe	150mg chloroquine diphosphate tablets.	Marcus Lacerda	AM	Chloroquine	Absolute mortality at day 28	marcuslacerda.br@gmail.com	+55 92 99114 7633	Fundação de Medicina Tropical	Randomized, parallel, Masking: Quadruple (Participant, Care Provider, Investigator, Outcomes Assessor)	Novel Coronavirus Pneumonia (COVID-19)	Interventional											18	100
NCT04303299	542	319	https://clinicaltrials.gov/ct2/show/NCT04303299	inclusion	1		Chloroquine + other	Other drug combinations	Asia	Thailand	80	Both	All	1	Open label		1	1	1	Diagnosed/suspected COVID	Not Recruiting	2020-03-11	Xsearch NCT	Various Combination of Protease Inhibitors, Oseltamivir, Favipiravir, and Hydroxychloroquine for Treatment of COVID19 : A Randomized Control Trial	Various Combination of Protease Inhibito	Confirmed	Experimental: Oseltamivir plus Chloroquine in Mild COVID19 Oseltamivir 300mg ( or 4-6 mg/kg) per day plus Hydroxychloroquine 800 mg per day In mild COVID19 Intervention: Drug: Oral Experimental: Darunavir and Ritonavir plus oseltamivir Darunavir 400 mg every 8 hours Ritonavir 200 mg (or 2.5 mg/kg ) per day plus plus Oseltamivir 300mg ( or 4-6 mg/kg) per day plus Hydroxychloroquine 400mg per day i…	Subsai Kongsaengdao	AM/AV/AT	Protease Inhibitors, Oseltamivir, Favipiravir, and Hydroxychloroquine	Eradication of nasopharyngeal SARS-CoV-2	skhongsa@gmail.com	.+66818180890	Rajavithi Hospital	Randomized, parallel 8-arm, Open label	Novel Coronavirus Pneumonia (COVID-19)	Interventional											16	100
NCT04299152	543	320	https://clinicaltrials.gov/ct2/show/NCT04299152	inclusion	1		Stem cells	Stem cells	North America	United States	20	Adults	All	1	Double blind		0		0	Hospitalised/Severe/ICU	Not Recruiting	2020-03-06	Xsearch NCT	Stem Cell Educator Therapy Treat the Viral Inflammation Caused by Severe Acute Respiratory Syndrome Coronavirus 2	Stem Cell Educator Therapy Treat the Vir	Severe	single session mononuclear cells (MNC)	Johnny Itticheria	SC	mononuclear cells (MNC)	Determine the number of Covid-19 patients who were unable to complete SCE Therapy	info@TianheCell.com	6308496657	Tianhe Stem Cell Biotechnologies Inc.	two-arm, partially masked, single center clinical study	Severe Acute Respiratory Syndrome (SARS) Pneumonia	Interventional											18	60
DRKS00021214	544	321	https://www.drks.de/drks_web/navigate.do?navigationId=trial.HTML&TRIAL_ID=DRKS00021214	inclusion	1		Vitamin B3	Dietary supplements	Europe	Germany	1300	Adults	All	N/A	Double blind		1	1	0	Diagnosed/suspected COVID	Not Recruiting	2020-04-01	Xsearch DKRS	Improvement of the nutritional status regarding nicotinamide (vitamin B3) and the course of COVID-19 disease	Improvement of the nutritional status re	Confirmed	Arm 1: Nicotinamide, 1,000 mg/day p.o. (2 x 500-mg tablets), for 4 weeks Arm 2: Silica, 245 mg/day p.o., for 4 weeks	Stefan Schreiber	Dietary supplements	Vitamin B3	Frequency of hospitalization with a continuous oxygen requirement of at least 24 hours.	s.schreiber@mucosa.de	0431 500-22201	Klinik für Innere Medizin I (UKSH Campus Kiel)	Parallel, randomized, double-blinded (patient/investigator)	Novel Coronavirus Pneumonia (COVID-19)	Interventional											18
CTRI024402	545	322	http://ctri.nic.in/Clinicaltrials/pmaindet2.php?trialid=42638&EncHid=&userName=024402	inclusion	1		Chloroquine	Antimalaria	Asia	India	500	Adults	All	1	Open label		1	1	0	Prevention	Not Recruiting	2020-03-31	Xsearch CTRI	Hydroxy Chloroquine, in open labelled, Randomised intervention for prevention of new infection and adverse outcomes following COVID-19 infection -A Tertiary Hospital based study	Hydroxy Chloroquine, in open labelled, R	Prevention	Preemptive hydroxychloroquine300 mg daily x 7 days followed by 300 mg weekly x 7 weeks vs none	Remesh Bhasi	AM	Chloroquine	Infected Non infected	remesh.bhasi@asterhospital.com	9447010634	Aster Malabar Institute of Medical Sciences	Randomized, Parallel Group, Active Controlled Trial, Open label	COVID- 19 (Prevention of infection)	Interventional											18	80
CTRI024479	546	323	http://ctri.nic.in/Clinicaltrials/pmaindet2.php?trialid=42713&EncHid=&userName=024479	Inclusion	1		Chloroquine	Antimalaria	Asia	India	32	Both	All	N/A	Open label		1	1	0	Hospitalised/Severe/ICU	Not Recruiting	2020-04-06	Xsearch CTRI	Study of the effect of Chloroquine in addition to standard therapy in COVID-19 patients	Study of the effect of Chloroquine in ad	Severe	Chloroquine phosphate tablets will be given in the dose of 500 mg twice daily for 10 days vi SoC	SALIL GUPTA	AM	Chloroquine	Length of hospitalisation	chickusalil@yahoo.com	8197751281	COMMAND HOSPITAL AIRFORCE	Randomized, parallel, open label		Interventional											14	99
IRCT20160310026998N11	547	324	https://www.irct.ir/trial/46690	Inclusion	1		Metformin	Other	Asia	Iran	200	Adults	All	1	Open label	1	0	1	0	Diagnosed/suspected COVID	Completed	2020-03-27	Xsearch IRCT	Study of the metformin effect on the survival and recovery rate of COVID-19 patients	Study of the metformin effect on the sur	Confirmed/suspected	Control group: will receive standard regimen for COVID-19. Metformin group: will receive standard regimen for COVID-19 plus metformin 500 BID.	Saba Ghaffary	AT	Metformin	decrease hospitalization period; decrease ARDS symptoms; decrease mortality	ghaffarys@tbzmed.ac.ir	+98 33266042	Faculty of Pharmacy, Tabriz University of Medical Sciences	Randomized, parallel	novel coronavirus pneumonia	Interventional							Tabriz University of Medical Sciences				18
IRCT20180923041093N3	549	325	https://www.irct.ir/trial/46721	Inclusion	1		TCM	UCM	Asia	Iran	100	Adults	All	1	Open label		1	1	0	Diagnosed/suspected COVID	Completed	28/03/2020	Xsearch IRCT	Efficacy of the myrtle (Myrtus Communis) syrup in the treatment of suspected novel coronavirus pneumonia (COVID-19)	Efficacy of the myrtle (Myrtus Communis)	Suspected	treatment of Covid-19 based on Fifth Edition of the Novel Corona Virus Guidelines with myrtle syrup for 5 days (Patients daily boil the contents of a pack containing 10 grams of myrtle fruit and 10 grams of sugar in 3 glasses of water gently to stay 2 glasses, then smooth it and drink one glass in the morning and one glass in the evening	Fatemeh sadat Hasheminasab	TCM	TCM	Temperature; cough (fisman cough severity score); weakness (VAS); muscular pain (VAS); respiratory rate (count)	hashemifa67@gmail.com	+98 71 5333 8547	Afzalipour Hospital	Randomized, parallel	Novel coronavirus	Interventional							Kerman University of Medical Sciences				18	65
IRCT20180802040678N4	550	326	https://www.irct.ir/trial/46824	Inclusion	1		Losartan	Antihypertensiva	Asia	Iran	100	Adults	All	1	Open label	1	0	1	0	Diagnosed/suspected COVID	Completed	01/04/2020	Xsearch IRCT	Evaluation of the effects of Losartan in patients with corona virus disease 2019	Evaluation of the effects of Losartan in	Confirmed	In the case group, patients will receive 25 mg losartan tablets two times daily and in the control group, patients will receive 5 mg amlodipine daily.	Masoud Nouri-Vaskeh	AT	Losartan	Mortality, 28 days; Performance of patients (SOFA respiratory score); Length of hospitalization	mnvaskeh@tbzmed.ac.ir	+98 41 3325 9778	Tabriz Emam Reza Hospital	Randomized, parallel	Novel coronavirus	Interventional							Tabriz University of Medical Sciences				18
IRCT20200323046841N1	551	327	https://www.irct.ir/trial/46715	Inclusion	1		TCM	UCM	Asia	Iran	30	Adults	All	3	Triple blind		0		0	Diagnosed/suspected COVID	Completed	28/03/2020	Xsearch IRCT	Efficacy evaluation of an herbal compound “Fluherb” on clinical symptoms and paraclinical parameters in highly suspected COVID-19 patients: a controlled randomized clinical trial.	Efficacy evaluation of an herbal compoun	Suspected	Intervention group will receive a herbal compound so-called Fluherb containing extracts of purslane, Plantain, Elderberry, licorice and turmeric prepared in suspension dosage form. The control group received a placebo syrup.	Mahdi Yousefi	TCM	TCM	Changing the patient's clinical status in the COVID-19 clinical classification table	yousefim@mums.ac.ir	+98 51 3876 6148	Imam Reza hospital	Randomized, parallel	Novel coronavirus	Interventional							Mashhad University of Medical Sciences					70
IRCT20120826010664N6	552	328	https://www.irct.ir/trial/46603	Inclusion	1		Chloroquine	Antimalaria	Asia	Iran	310	Adults	All	N/A	Double blind		0		0	Prevention	Recruiting	05/04/2020	Xsearch IRCT	Effect of hydroxychloroquine on prevention of covid-19 virus infection among treatment staff in Arash hospital-A double-blind clinical trial	Effect of hydroxychloroquine on preventi	Prevention	A or B groups and will be assigned to one hydroxychloroquine group and one placebo group.	Reihaneh Pirjani	AM	Chloroquine	covid-19 infection (PCR-test and clinical symptoms)	pirjani@razi.tums.ac.ir	+98 21 7788 3288	Tehran University of Medical Sciences	Randomized, parallel; blinded researcher and patient	Prevention of novel coronavirus	Interventional							Tehran University of Medical Sciences				18	60
IRCT20200324046850N3	554	329	https://www.irct.ir/trial/46718	Inclusion	1		Naproxen	Antiinflammatory	Asia	Iran	40	Both	All	1	Open label		0		0	Diagnosed/suspected COVID	Completed	30/03/2020	Xsearch IRCT	The effect of naproxen on the healing process of patients with COVID-19	The effect of naproxen on the healing pr	Confirmed	patients also take naproxen in addition to taking Standard protocol national drugs	Sara Mobarak	AI	naproxen	Fever; Cough; Chills; Night sweats	s.mobarak@abadanums.ac.ir	+98 61 5326 7800	Ayatollah Taleghani Hospital	Randomized, parallel, open label	novel coronavirus pneumonia	Interventional							Abadan University of Medical Sciences				15
IRCT20151113025025N3	555	330	https://www.irct.ir/trial/46531	Inclusion	1		ACE inhibitor	Antihypertensiva	Asia	Iran	60	Adults	All	1	Double blind	1	0	1	0	Hospitalised/Severe/ICU	Recruiting	29/03/2020	Xsearch IRCT	Clinical Trial of renin-angiotensin-aldosterone system inhibitors with halting their administration and the effect on clinical outcomes of patients with corona virus disease-2019 (COVID-19) referring to Sina Hospital in 2020	Clinical Trial of renin-angiotensin-aldo	Hospitalised	Patients continuing to consume medications inhibiting renin-angiotensin-aldestrone system 2) Patients whose medication inhibiting renin-angiotensin-aldestrone system is discontinued and substituted by a calcium channel blocker with or without a beta blocker	Maryam Bahreini	AT	ACE inhibitors discontinuation/continuation	Mortality 3 months	m-bahreini@tums.ac.ir	+98 21 6312 1413	Tehran University of Medical Sciences, Sina Hospital	Randomized, parallel; blinded researcher and patient	novel coronavirus pneumonia	Interventional							Tehran University of Medical Sciences				18
IRCT20101219005416N2	556	331	https://www.irct.ir/trial/46775	Inclusion	1		TCM	UCM	Asia	Iran	80	N/A	All	1	Single blind		1	1	0	Diagnosed/suspected COVID	Completed	03/04/2020	Xsearch IRCT	Evaluation of the effect of Traditional medicine product incorporated in the base of Astragalus gossypinus with food spice on improvement of clinical menifestation of COVID -19 patients with conventional protocol	Evaluation of the effect of Traditional	Confirmed	Intervention group received standard treatment with traditional medicine protocol including traditional syrup based on Astragalus gossypinus a rate of 10 cc daily for two hours on the first and second days and 10 cc on the following days.	Haleh Tajadini	TCM	TCM	Response to the treatment (Significant clinical improvement)	drhalehtajadini@gmail.com	+98 34 3243 5539	Kerman University of Medical Sciences	Randomized, parallel; blinided analyst	novel coronavirus pneumonia	Interventional							Kerman University of Medical Sciences
IRCT20180923041093N4	557	332	https://www.irct.ir/trial/46728	Inclusion	1		TCM	UCM	Asia	Iran	100	Adults	All	N/A	Open label		1	1	0	Diagnosed/suspected COVID	Completed	28/03/2020	Xsearch IRCT	Efficacy of the barley-based remedy in the treatment of suspected novel coronavirus (COVID-19) pneumonia	Efficacy of the barley-based remedy in t	Suspected	Intervention group: Receiving medication for treatment of Covid-19 based on Ministry of Health protocol with barley based-compound	Fatemeh sadat Hasheminasab	TCM	TCM	Cough (severity-frequency); Weakness; Muscular pain; Respiratory rate	hashemifa67@gmail.com	+98 71 5333 8547	Kerman University of Medical Sciences	Randomized, parallel, open label	Novel coronavirus	Interventional							Kerman University of Medical Sciences				18	65
IRCT20081019001369N2	558	333	https://www.irct.ir/trial/46868	Inclusion	1		TCM	UCM	Asia	Iran	40	Adults	All	1	Double blind		0		0	Mild/moderate	Recruiting	07/04/2020	Xsearch IRCT	Clinical trial of berberine against COVID-19	Clinical trial of berberine against COVI	Mild	In addition to the common anti-corona virus drugs, the treatment group also receives berberine.	Hossein Hosseinzadeh	TCM	TCM	Time interval until clinical symptoms improve	hosseinzadehh@mums.ac.ir	+98 51 3180 1193	Mashhad University of Medical Sciences	Randomized, parallel; blinded physician and patient	Novel coronavirus symptoms	Interventional							Mashhad University of Medical Sciences				18	65
IRCT20180610040049N4	560	334	https://www.irct.ir/trial/46850	Inclusion	1		TCM	UCM	Asia	Iran	60	Adults	All	1	Double blind		0		0	Diagnosed/suspected COVID	Recruiting	03/04/2020	Xsearch IRCT	The comparison of effectiveness of Tanacetum parthenium (L) Sch. syrups on clinical and paraclinical features of inpatients infected with 2019 novel coronavirus COVID-19, Parallel randomized trial	The comparison of effectiveness of Tanac	Confirmed	2 weeks the patients in the intervention group will receive the Tanacetum parthenium (L) Sch syrup and the control group will receive placebo.	Amirhosein Latifi	TCM	TCM	CRP in cerum	Sah.latifi@arakmu.ac.ir	+98 86 3417 3601	Ghoum University of Medical Sciences	Randomized, parallel; blinded physician and patient and analyst	Novel coronavirus	Interventional							Ghoum University of Medical Sciences				20	70
IRCT20180610040049N3	561	335	https://www.irct.ir/trial/46697	Inclusion	1		TCM	UCM	Asia	Iran	60	Adults	All	1	Double blind		0		0	Diagnosed/suspected COVID	Completed	29/03/2020	Xsearch IRCT	The effect of Trachyspermum copticum-based traditional medicine product on clinical manifestations and Para clinical features in patients with COVID-19: A Randomized clinical trial	The effect of Trachyspermum copticum-bas	Confirmed	2 weeks the patients in the intervention group will receive the Trachyspermum copticum syrup and the control group will receive placebo.	Amirhosein Latifi	TCM	TCM	CRP in cerum	Sah.latifi@arakmu.ac.ir	+98 86 3417 3601	Arak University of Medical Sciences	Randomized, parallel; blinded physician and patient and analyst	Novel coronavirus	Interventional							Arak University of Medical Sciences				20	70
IRCT20140528017891N8	562	336	https://www.irct.ir/trial/46623	Inclusion	1		Stem Cells	Stem cells	Asia	Iran	10	Adults	All	1	Double blind	1	0	1	0	Diagnosed/suspected COVID	Completed	28/03/2020	Xsearch IRCT	Evaluation of the efficacy and safety of cord-derived mesenchymal stem cell transplantation in the treatment of COVID-19	Evaluation of the efficacy and safety of	Confirmed	intervention group will be injected with an initial dose of 0.5–1 milion / kg of MSC. This process will be performed on the first, third and sixth days.	Nader Tavakoli	SC	UC-MSC (Umbilical Cord(UC)-Derived Mesenchymal Stem Cells(MSCs))	Mortality, 28 days	tavakoli.n@iums.ac.ir	+98 21 8891 5410	Iran University Of Medical Science	Randomized, parallel; blinded analyst and patient	novel coronavirus pneumonia	Interventional							MOM research and innovation center				18	95
IRCT20130917014693N10	563	337	https://www.irct.ir/trial/46849	Inclusion	1		Chloroquine	Antimalaria	Asia	Iran	100	Adults	All	1	Open label		1	1	0	Prevention	Completed	08/04/2020	Xsearch IRCT	Evaluation the efficacy and safety of Hydroxychloroquine administration for COVID-19 post exposure prophylaxis	Evaluation the efficacy and safety of Hy	Prevention	In intervention group, participants receive Hydroxychloroquine (Amin Pharmaceutical company, Isfahan) at dose of 200 mg TDS up to 7 days	Zahra Sahraei	AM	Chloroquine	Fever; Cough; Dyspnea; Sore throat; Myalgia	z.sahraei@sbmu.ac.ir	+98 21 8887 3704	Faculty of pharmacy, Shahid beheshti university of medical sciences	Randomized, parallel, open label	Prevention of novel coronavirus	Interventional							Shahid Beheshti University of Medical Sciences				18
IRCT20200324046850N5	564	338	https://www.irct.ir/trial/46751	Inclusion	1		Vitamin C	Dietary supplements	Asia	Iran	40	N/A	All	1	Single blind		1	1	0	Hospitalised/Severe/ICU	Completed	04/04/2020	Xsearch IRCT	Study of the effect of Vitamin C on duration of hospital stay in patients with Covid-19	Study of the effect of Vitamin C on dura	Hospitalised	Intervention Group: Patients with Covid-19 that will be Recipient of standard national protocol drugs + Vitamin C 500mg	Sara Mobarak	Dietary supplements	Vitamin C	Number of hospital days	s.mobarak@abadanums.ac.ir	+98 61 5326 7800	Abadan University of Medical Sciences	Randomized, parallel; blinided patient	novel coronavirus pneumonia	Interventional							Abadan University of Medical Sciences
IRCT20200317046797N2	566	339	https://www.irct.ir/trial/46786	Inclusion	1		fingolimod	Other immunotherapeutics	Asia	Iran	40	Adults	All	1	Open label	1	0	1	0	Hospitalised/Severe/ICU	Completed	2020-04-03	Xsearch IRCT	Effect of Fingolimod for treatment of COVID-19-induced cytokine storm	Effect of Fingolimod for treatment of CO	Hospitalised	Intervention group: will receive a standard regimen for COVID-19 plus fingolimod	Sepideh Zununi Vahed	IT	fingolimod	Mortality rate (in-hospital); Improvement of the symptoms of lung, pulmonary infiltrates; Decreased hospitalization period; need for intubation	sepide.zununi@gmail.com	+98 41 3336 9331	Tabriz University of Medical Sciences	Randomized, parallel, open label	novel coronavirus pneumonia; moderate-severe	Interventional							Tabriz University of Medical Sciences				18	80
IRCT20190727044343N1	567	340	https://www.irct.ir/trial/46629	Inclusion	1		febuxostat	Other	Asia	Iran	60	Adults	All	1	Triple blind		0		0	Mild/moderate	Completed	05/04/2020	Xsearch IRCT	The effect of febuxostat against lung injury induced by COVID-19 virus in infected patients: A clinical trial study	The effect of febuxostat against lung in	Mild	Intervention group will receive acetaminophen + febuxostat and comparison group will receive acetaminophen + hydroxychloroquine.	Lotfollah Davoodi	AT	febuxostat	CT-scan findings	lotfdavoodi@yahoo.com	+98 11 4221 8231	Mazandaran University of Medical Sciences	Randomized, parallel; blinded physician and patient and analyst	Novel coronavirus	Interventional							Mazandaran University of Medical Sceinces				18
IRCT20140617018126N2	568	341	https://www.irct.ir/trial/46637	Inclusion	1		TCM	UCM	Asia	Iran	60	Adults	All	1	Open label		0		0	Diagnosed/suspected COVID	Completed	29/03/2020	Xsearch IRCT	The Effect of Persian Medicine Products on the Clinical and Laboratory Symptoms of Patients With or Suspected of Covid-19	The Effect of Persian Medicine Products	Confirmed/suspected	Persian medicine capsule, Persian medicine syrup	Mostafa Araj-Khodaei	TCM	TCM	Oxygen saturation; Respiratory Rate	araj@tbzmed.ac.ir	+98 41 3337 9528	Tabriz University of Medical Sciences	Randomized, parallel, open label	Novel coronavirus	Interventional							Tabriz University of Medical Sciences				18	85
IRCT20200317046797N1	569	342	https://www.irct.ir/trial/46573	Inclusion	1		Camostat mesilate	Antiinflammatory	Asia	Iran	40	Adults	All	1	Open label	1	0	1	0	Hospitalised/Severe/ICU	Completed	03/04/2020	Xsearch IRCT	Effect of Camostate mesylate on clinical improvement and outcome of Coronavirus (COVID-19)-induced pneumonia	Effect of Camostate mesylate on clinical	Hospitalised	Patients in the Camostate mesylate group will be prescribed Camostate mesylate 200 mg three times daily for three days and standard regimen for COVID-19	Sepideh Zununi Vahed	AI	Camostate mesylate	Mortality rate (in-hospital); Hospitalization period, Lung symptoms, Need for intubation	sepide.zununi@gmail.com	+98 41 3336 9331	Tabriz University of Medical Sciences	Randomized, parallel, open label	novel coronavirus pneumonia; moderate-severe	Interventional							Tabriz University of Medical Sciences				18	80
IRCT20150914024017N1	570	343	https://www.irct.ir/trial/46665	Inclusion	1		INF-Beta	Other immunotherapeutics	Asia	Iran	40	Adults	All	1	Quadruple blind		0		0	Hospitalised/Severe/ICU	Recruiting	03/04/2020	Xsearch IRCT	The efficacy of Interferon beta 1 a (ReciGen) in treatment of patients with Covid-19 in Sina Hospital Emergency Department	The efficacy of Interferon beta 1 a (Rec	Hospitalised	receive 1 daily dose (44 mcg) of Recigen or placebo subcutaneously for five days	Pooya Payandemehr	IT	Interferon beta 1 a (ReciGen)	Length of hospitalisation; need for ICU; need for intubation	p-payandemehr@sina.tums.ac.ir	+98 44670534	Tehran University of Medical Sciences	Randomized, parallel; blinded physician and patient and analyst and reseacher	novel coronavirus pneumonia	Interventional							Tehran University of Medical Sciences				18
IRCT20200310046736N1	571	344	https://www.irct.ir/trial/46424	Inclusion	1		Convalescent Plasma	Antibodies	Asia	Iran	45	Adults	All	3	Single blind		0		0	Diagnosed/suspected COVID	Not Recruiting	01/04/2020	Xsearch IRCT	Comparison of The Therapeutic Effect of Convalescent Plasma and Plasma-derived Immunoglobulin-enriched solution on COVID-19 Patients: A Clinical Trial Study	Comparison of The Therapeutic Effect of	Confirmed/suspected	COVID-19 patients (2 subgroups) & Controls: _Patients will treat with IV convalescent plasma and or plasma-derived immunoglobulin-enriched solution (PDIES), respectively	Parastoo Moradi Choghakabodi	IT	convalescent plasma transfer /Plasma-derived Immunoglobulin-enriched solution	complete remission of clinical signs of disease; Negative result for COVID-19 RT-PCR test; Normal CT Scan	parastoomoradi40@yahoo.com	+98 61 3337 7435	Ahvaz University of Medical Sciences	Randomized, parallel; blinded patient	novel coronavirus pneumonia	Interventional							Ahvaz University of Medical Sciences				20	45
IRCT20160316027081N1	572	345	https://www.irct.ir/trial/46678	Inclusion	1		TCM	UCM	Asia	Iran	374	N/A	All	1	Double blind	1	0	1	1	Diagnosed/suspected COVID	Completed	31/03/2020	Xsearch IRCT	Comparison of the Effectiveness of Standard Treatment with Standard Treatment plus licorice extract in Improving Respiratory Symptoms and Survival Rate in COVID-19 Patients	Comparison of the Effectiveness of Stand	Confirmed	licorice-based herbal formulation in a 240 cc syrup, at a dose of 10 cc three times daily for a maximum of eight days.	Saeed Soleiman-Meigooni	TCM	TCM	Mortality rate (in-hospital); Hospitalization period; Increase or decrease of respiratory rates more than 25% of primary respiratory rate; Myocardial Infarction or unstable angina; Rising of creatinine more than 25% primary creatinine	s.s.meigooni@ajaums.ac.ir	+98 21 4414 4939	AJA university of medical sciences	Randomized, parallel; blinded physician and patient	novel coronavirus pneumonia	Interventional							Artesh University of Medical Sciences
IRCT20200322046833N1	573	346	https://www.irct.ir/trial/46731	Inclusion	1		Chloroquine + other	Other drug combinations	Asia	Iran	100	Adults	All	1	Triple blind		0		0	Hospitalised/Severe/ICU	Completed	2020-04-03	Xsearch IRCT	Evaluation of the efficacy and safety of Umifenovir in the treatment of hospitalized patients with covid-19: A randomized clinical trial	Evaluation of the efficacy and safety of	Hospitalised	Hydroxychlorquine 400 mg every 12 hours in the first day then 200 mg every 12 hours ,Atazanavir/Ritonavir 300/100 mg once daily, Uumifenovir 100 mg 2 capsules every 6 hours. Control group: Hydroxychloroquine 400 mg every 12 hours for the first day then 200 mg every 12 hours Atazanavir / ritonavir 300/100 mg, two placebo capsules (hand made) every 6 hours.	Farhad Najmeddin	AM/AV/AT	Hydroxychloroquine/Atazanavir/Ritonavir/Uumifenovir	Clinical improvement includes fever rupture; Clinical improvement includes SPO2 >93%; Improvement of respiratory symptoms; Adverse effects	f-najmeddin@sina.tums.ac.ir	+98 21 6695 4709	Tehran University of Medical Sciences	Randomized, parallel; blinded physician and patient and reseacher	Novel coronavirus	Interventional							Center for Progress and Development of Iran				18
IRCT20190917044805N2	574	347	https://www.irct.ir/trial/46804	Inclusion	1		Vitamin C	Dietary supplements	Asia	Iran	60	Adults	All	3	Quadruple blind		1	1	0	Hospitalised/Severe/ICU	Recruiting	31/03/2020	Xsearch IRCT	Effects of High-dose Vitamin C on Treatment, Clinical Symptoms and Laboratory Signs of Iranian COVID-19 Patients: A Double Blind Randomized Clinical Trial	Effects of High-dose Vitamin C on Treatm	Hospitalised	Treatment group will receive 12g Vitamin C in dextrose5% to total volume of 200 ml for 4 days	Kourosh Sadeghi	Dietary supplements	Vitamin C	Time to clinical improvement (TTIC); Time to clinical improvement (TTIC) of NEWS2 (National Early Warning Score 2) of 0 maintained for 24 hours	sadeghi_k@tums.ac.ir	+98 21 6695 4709	Tehran University of Medical Sciences	Randomized, parallel; blinded physician and patient and analyst and reseacher	novel coronavirus pneumonia; moderate-severe	Interventional							Tehran University of Medical Sciences				18
IRCT20200319046819N1	575	348	https://www.irct.ir/trial/46838	Inclusion	1		Vitamin B/A/D/E/C	Dietary supplements	Asia	Iran	60	Adults	All	1	Single blind	1	0	1	0	Diagnosed/suspected COVID	Recruiting	04/04/2020	Xsearch IRCT	Impact of vitamin B, A, D, E, C supplementation on improvement and mortality rate in patients with COVID-19 admitted in intensive care unit	Impact of vitamin B, A, D, E, C suppleme	Confirmed	Intervention group supplemented with vitamin D at 25,000 international units of vitamin A daily, 600,000 international units of vitamin D once daily, 300 units of vitamin E twice daily, 500 mg Vitamin C is taken 4 times a day and finally B vitamins are taken as a daily solute ampoule	Sama Bitarafan	Dietary supplements	Vitamin B/A/D/E/C	Mortality, before and after intervention; Intensity of pulmonary involvement; WBC, CRP, IL6,TNF-α, IFN-G ، ESR	bitarafans@gmail.com	+98 21 6694 8899	Tehran University of Medical Sciences	Randomized, parallel; blinded patient	Novel coronavirus	Interventional							Tehran University of Medical Sciences				20	60
IRCT20200318046812N1	576	349	https://www.irct.ir/trial/46783	Inclusion	1		Chloroquine + other	Antimalaria_antiviral/antibiotic	Asia	Iran	324	Both	All	1	Open label		0		1	Hospitalised/Severe/ICU	Completed	2020-04-01	Xsearch IRCT	Evaluation of safety and efficacy of hydroxychloroquine plus favipiravir drug regimen in comparison with hydroxychloroquine plus kaletra on the need for intensive care unit treatment in patients with COVID-19; a randomized, multicenter, parallel groups, open label study	Evaluation of safety and efficacy of hyd	Hospitalised	Group receiving Favipiravir plus Hydroxychloroquine. Stat dose of eight 200 mg Favipiravir tablets (total 1600 mg) followed by Favipiravir 600 mg three times a day for 7 days plus Hydroxychloroquine 200mg two times per day for 7 days. Control group: Group receiving Kaletra plus Hydroxychloroquine regimen. Stat dose of two 200 mg Hydroxychloroquine tablets (total 400 mg) followed by Kaletra(Lopina…	Behzad Einollahi	AM/AV	Chloroquine/Favipiravir	ICU admission	einollahi@numonthly.com	+98 21 8860 0067	Iran university of medical sciences, Tehran	Randomized, parallel, open label	Novel Coronavirus (COVID-19)	Interventional											16	100
IRCT20140907019073N4	577	350	https://www.irct.ir/trial/46736	Inclusion	1		TCM	UCM	Asia	Iran	60	N/A	All	1	Triple blind		0		1	Diagnosed/suspected COVID	Recruiting	2020-03-29	Xsearch IRCT	Double blind clinical trial study on Evaluation of the effectiveness of Ipecac homeopathic remedy in control of Clinical manifestations of COVID-19	Double blind clinical trial study on Eva	Confirmed	Ipecac homeopathic remedy vs placebo	Ali Mazaherinezhad	TCM	TCM	Fever	hrmc@iums.ac.ir	+98 21 6650 2248	Rasoul-e- Akram hospital	Randomized, parallel, double blinded (participant, care provider, outcome assessor)	Novel Coronavirus (COVID-19)	Interventional
IRCT20200324046850N1	578	351	https://www.irct.ir/trial/46732	Inclusion	1		D3 and N-acetylcysteine	Dietary supplements	Asia	Iran	100	N/A	All	1	Single blind		0		0	Diagnosed/suspected COVID	Recruiting	2020-03-29	Xsearch IRCT	Comparison of vitamin D3 and N-acetylcysteine prescription in COVID19 patients and their effect on recovery process	Comparison of vitamin D3 and N-acetylcys	Confirmed	The first group only receiving Standard protocol national drugs The second group receiving Standard protocol national drugs plus vitamin D3 50,000 units once a week. The third group receiving Standard protocol national drugs plus 600mg daily N acetylcysteine. The fourth group receiving Standard protocol national drugs drugs with a 500,000 unit dose of vitamin D3 once a week with 600mg N acetylcys…	Sara Mobarak	Dietary supplements	D3 and N-acetylcysteine	Shortness of breath	s.mobarak@abadanums.ac.ir	+98 61 5326 7800	Abadan University of Medical Sciences	Randomized, parallel, 4-arm, single blind	Novel Coronavirus (COVID-19)	Interventional
IRCT20200405046953N1	579	352	https://www.irct.ir/trial/46930	Inclusion	1		Chloroquine + other	Antimalaria_antiviral/antibiotic	Asia	Iran	3000	Adults	All	1	Open label	1	0	1	1	Hospitalised/Severe/ICU	Completed	2020-04-06	Xsearch IRCT	Randomzied trial of additional treatments for COVID-19 in hospitalized patients who are all receiving the local standard of care- Iranian SOLIDARITY multicentre trial	Randomzied trial of additional treatment	Hospitalised	Local standard of care alone OR local standard of care plus one of: • Remdesivir (daily infusion for 10 days) • Chloroquine or Hydroxychloroquine (two oral loading doses, then orally twice daily for 10 days) [NB Some collaborating hospitals will study chloroquine, others hydroxychloroquine] • Lopinavir with Ritonavir (orally twice daily for 14 days) • Lopinavir with Ritonavir (ditto) plus Interfe…	Hadiseh Hosami	AM/AV	Chloroquine/Remdesivir/lopinovir/retinovir	All-cause mortality	h-hosami@tums.ac.ir		Baharloo Hospital	Randomized, parallel, 5-arm, open label	Novel Coronavirus (COVID-19)	Interventional											18
IRCT20200312046749N1	580	353	https://www.irct.ir/trial/46551	Inclusion	1		Altebrel	Other immunotherapeutics	Asia	Iran	80	Both	All	3	Quadruple blind		1	1	0	Diagnosed/suspected COVID	Recruiting	2020-03-28	Xsearch IRCT	Evaluation the efficacy of Tumor Necrosis Factor alpha inhibitor in COVID-19 outcomes: a prospective clinical trial study.	Evaluation the efficacy of Tumor Necrosi	Confirmed/suspected	Altebrel 50 mg or placebo subcutaneously in 2 dose in one week.	Raheleh Assari	IT	Altebrel	Improvement of pulmonary manifestations and the duration.	r1assari@yahoo.com	+98 21 6694 8443	Imam Khomeini Hospital	Randomized, parallel, double-blind (participants, care provider, investigator, outcome assessor, data analyser)		Interventional											15
IRCT20180712040449N2	581	354	https://www.irct.ir/trial/46782	Inclusion	1		TCM	UCM	Asia	Iran	68	Adults	All	1	Open label		0		1	Diagnosed/suspected COVID	Completed	2020-04-01	Xsearch IRCT	Formulation and evaluation of their efficacy of herbal capsule and decoction in patients with COVID-19 via a randomized clinical trial.	Formulation and evaluation of their effi	Confirmed	herbal treatment (decoction every 8 hours and capsule every 12 hours) vs SoC	Mehrdad Karimi	TCM	TCM	Saturation	shpmc@sbmu.ac.ir	+98 21 3644 2012	Shohada Pakdasht Specialty and Subspecialty Hospital	Randomized, parallel, open label	Novel Coronavirus (COVID-19)	Interventional											18	75
IRCT20120225009124N4	582	355	https://www.irct.ir/trial/46810	Inclusion	1		Glucocorticoid / IV-IG / INF-beta	Other drug combinations	Asia	Iran	105	Adults	All	3	Open label		1	1	0	Hospitalised/Severe/ICU	Completed	2020-04-02	Xsearch IRCT	Efficacy of different methods of administeration of combination regiemn including Glucocorticoide, IV-IG and Interferone beta for treatment of patients with severe COVID-19: a randomized controlled trial	Efficacy of different methods of adminis	Severe	Control arm: receive standard treatment for COVID19 according to the protocol of MOH of Iran. Intervention 1: receive standard treatment for COVID19 and combination of dexamethadone, IV-IG and Interferon beta at admission. Intervention 2: receive standard treatment for COVID19 and combination of Glucocorticoide, IV-IG and Interferon beta 48 hours after admission.	Nafiseh Abdolahi	AI/IT	Glucocorticoide / IV-IG / INF-beta	Saturation	grcgh@goums.ac.ir	+98 17 3225 1910	Sayyad Shirazi hospital	Randomized, parallel, open label	Novel Coronavirus (COVID-19)	Interventional											18	70
IRCT20130812014333N145	583	356	https://www.irct.ir/trial/46790	Inclusion	1		Sofosbuvir and Velpatasvir	Antiviral	Asia	Iran	80	Adults	All	1	Single blind		0		0	Diagnosed/suspected COVID	Recruiting	2020-03-30	Xsearch IRCT	Comparative assessment of the efficacy and safety of add ontreatment with “Sofosbuvir plus Velpatasvir” to “standard of care therapeutic regimen” in patients with COVID-19	Comparative assessment of the efficacy a	N/A	The intervention group in addition to 400 mg of hydroxychloroquine and 100 to 400 mg of Lupinavir-ritonavir at a time, will receive 100 to 400 mg of Sofosbuvir-Velpatasvir for 10 days. The control group will receive 400 mg of hydroxychloroquine and 100 to 400 mg of lupinavir-ritonavir for 10 days at a time.	Babak Sayad	AV	Sofosbuvir and Velpatasvir	Clinical status 10 days and discharge	babaksayad@kums.ac.ir	+98 83 3427 6309	Golestan Hospital	Randomized, parallel, single blind	Novel Coronavirus (COVID-19)	Interventional											18
IRCT20200318046812N2	584	357	https://www.irct.ir/trial/46968	Inclusion	1		Chloroquine + other	Other drug combinations	Asia	Iran	906	Both	All	1	Open label		1	1	1	Hospitalised/Severe/ICU	Recruiting	2020-04-08	Xsearch IRCT	Safety and efficacy of “Hydroxychloroquine + Azithromycin + Naproxen + Prednisolone” and “Hydroxychloroquine + Azithromycin + Naproxen” regimens in comparison with “Hydroxychloroquine + kaletra” on the need for intensive care unit treatment in patients with COVID-19; a randomized, multicenter, parallel groups, open label study	Safety and efficacy of “Hydroxychloroqui	Hospitalised	Intervention group1: Stat dose of two 200 mg Hydroxychloroquine tablets (total 400 mg) followed by two 250 mg Azythromycin in first day and 250 mg Azythromycin a day for 5 days +five 5 mg Prednisolone tablets a day for 5 days +250 mg Naproxen tablets two times a day for 5 days. Intervention group2: Stat dose of two 200 mg Hydroxychloroquine tablets followed by two 250 mg Azythromycin in first day…	Mostafa Ghanei	AM/AV/AB/AI	Chloroquine/Ritonavir/Lopinavir/Azithromycin/Naproxen	Admission to ICU	mghaneister@gmail.com	+98 21 8860 0067	Bagheiat-allah University of Medical Sciences	Randomized, parallel, open label	Novel Coronavirus (COVID-19)	Interventional											16	80
IRCT20200328046882N1	586	358	https://www.irct.ir/trial/46784	Inclusion	1		Sofosbuvir	Antiviral	Asia	Iran	60	Adults	All	1	Double blind		1	1	0	Hospitalised/Severe/ICU	Recruiting	2020-04-05	Xsearch IRCT	Efficacy and safety of Sofosbuvir in the treatment of SARS-CoV-2: An Open Label phase II Trial	Efficacy and safety of Sofosbuvir in the	Hospitalised	Groupَ A: Experimental: Participants will receive standard of care therapy continued together with Sofosbuvir 400 mg single dose daily for 5 days Group B: Experimental: Participants will receive standard of care therapy continued together with Sofosbuvir 400 mg single dose daily for 10 days	Mostafa Alavi -Moghaddam	AV	Sofosbuvir	No fever at 14 days	mosalavi@sbmu.ac.ir	+98 21 7754 3634	Shahid Beheshti University of Medical Sciences	Randomized, parallel, double blind	Hospitalised with COVID-19	Interventional											18
IRCT20170117032004N3	587	359	https://www.irct.ir/trial/46564	Inclusion	1		Vitamin A	Dietary supplements	Asia	Iran	30	Adults	All	N/A	Open label		0		0	Hospitalised/Severe/ICU	Recruiting	2020-03-29	Xsearch IRCT	Evaluation the effect of vitamin A on respiratory signs and hospitalization in patients with COVID-19	Evaluation the effect of vitamin A on re	Hospitalised	50000 Vitamin A daily for two weeks vs SoC	Zeinab Nikniaz	Dietary supplements	Vitamin A	Duration of hospitalization	nikniazz@tbzmed.ac.ir	+98 41 3336 7473	Tabriz University of Medical Sciences	Randomized, parallel, open label	Hospitalised with COVID-19	Interventional											18
EUCTR2020-001194-69	588	360	https://www.clinicaltrialsregister.eu/ctr-search/trial/2020-001194-69/ES	Inclusion	1		Mefloquine	Antimalaria	Europe	Spain	100	Adults	All	1	Double blind		1	1	0	Prevention	Recruiting	2020-03-30	Xsearch EUCTR	Pilot study to evaluate the efficacy and safety of mefloquine as prophylaxis in people exposed to the disease caused by the SARS-CoV-2 coronavirus (COVID-19)	Pilot study to evaluate the efficacy and	Prevention	Mefloquine 250 mg orally vs placebo	Félix Gutiérrez Rodero	AM	Mefloquine	COVID-19 infection	gutierrez_fel@gva.es	34966616234	FISABIO	Randomized, parallel, double blind	Prevention of novel coronavirus	Interventional											18
EUCTR2020-001421-31	589	361	https://www.clinicaltrialsregister.eu/ctr-search/trial/2020-001421-31/ES	Inclusion	1		Chloroquine	Antimalaria	Europe	Spain	1530	Adults	All	1	Open label		0		1	Prevention	Recruiting	2020-04-07	Xsearch EUCTR	Clinical trial randomized, unblinded and controled for evaluation of efficacy and safety of hydroxychloroquine chemoprophylaxis against SARS-CoV-2 (COVID-19) infection in healthcare professionals.	Clinical trial randomized, unblinded and	Prevention	Hydroxychloroquine 200 mg orally vs none	Emilio Garcia Cabrera	AM	Chloroquine	COVID-19 infection (PCR-test and clinical symptoms)	secretaria@delosclinical.com		Sociedad Española de Farmacia Hospitalaria	Randomized, parallel, open label	Prevention of novel coronavirus in healthcare	Interventional											18	64
EUCTR2020-001445-39	594	362	https://www.clinicaltrialsregister.eu/ctr-search/trial/2020-001445-39/ES	Inclusion	1		Glucocorticoid/Tacrolimus	Other drug combinations	Europe	Spain	84	Adults	All	1	Open label		1	1	0	Hospitalised/Severe/ICU	Recruiting	2020-04-03	Xsearch EUCTR	PRAGMATIC, CONTROLLED, OPEN, SINGLE CENTER, RANDOMIZED, PHASE II CLINICAL TRIAL TO EVALUATE METHYLPREDNISOLONE PULSES AND TACROLIMUS IN HOSPITALIZED PATIENTS WITH SEVERE PNEUMONIA SECONDARY TO COVID-19 (TACROVID)	PRAGMATIC, CONTROLLED, OPEN, SINGLE CENT	Severe	20 to 125 mg methylprednisolone vs 0,1-0,2 mg/kg tacrolimus	Xavier Solanich Moreno	AM/IT	Methylprednisolone/Tacrolimus	Time (days) to clinical stability after initiation of trial treatment in hospitalised patients with severe pneumonia secondary to COVID-19 and elevated inflammatory parameters	xsolanich@bellvitgehospital.cat	34932602324	Servei Medicina Interna. Hospital de Bellvitge	Randomized, parallel, open label	Hospitalized patients with severe pneumonia secondary to COVID-19.	Interventional											18
EUCTR2020-001606-33	597	363	https://www.clinicaltrialsregister.eu/ctr-search/trial/2020-001606-33/ES	Inclusion	1		Chloroquine + other	Other drug combinations	Europe	Spain	132	Adults	All	1	Open label		1	1	0	Mild/moderate	Recruiting	2020-04-07	Xsearch EUCTR	Randomized clinical trial to evaluate the efficacy of hydroxychloroquine associated or not with azithromycin as a treatment for COVID-19 infection.	Randomized clinical trial to evaluate th	Mild		Eunate Arana Arri	AM/AI/AB	Ibuprofen+paracetamol/Hydrochloroquine/Azithromycin	Proportion of patients with negative viral load by CODV-19 [SARS-CoV-2 (PCR)] at 6 days after the start of treatment	eunate.aranaarri@osakidetza.eus	34946182646	Asociación Instituto Investigación Biocruces Bizkaia	Randomized, open label	COVID-19 infection	Interventional											18
EUCTR2020-001246-18	599	364	https://www.clinicaltrialsregister.eu/ctr-search/trial/2020-001246-18/FR	Inclusion	1		Chloroquine + other	Other drug combinations	Europe	France	1000	Adults	All	3	Open label	1	0	1	0	Hospitalised/Severe/ICU	Recruiting	2020-03-25	Xsearch EUCTR	Cohort Multiple randomized controlled trials open-label of immune modulatory drugs and other treatments in COVID-19 patients	Cohort Multiple randomized controlled tr	Severe	Sarilumab 200mg sc, tocilizumab 400mg iv, anakinra 100mg iv, hydroxychloroquine 200mg orally vs SoC	Cécile Kedzia	AM/IT/AB	Sarilumab/Tocilizumab/Anakinra/hydroxychloroquine/Azithromycin/eculizumab	For the group 1 of patients not requiring ICU: Co Primary Endpoints 1. Survival without needs of ventilator utilization (including Non invasive ventilation) at day 14. Thus, events considered are needing ventilator utilization (including Non Invasive Ventilation, NVI), or death. New DNR order will be considered as an event at the date of the DNR. 2. Early end point : OMS progression scale < or = …	cecile.kedzia@aphp.fr	13344 84 17 33	Assistance Publique - Hôpitaux de Paris	Randomized, parallel, open label	hospitalized with COVID-19	Interventional											18
EUCTR2020-001366-11	602	365	https://www.clinicaltrialsregister.eu/ctr-search/trial/2020-001366-11/ES	Inclusion	1		Chloroquine + other	Antimalaria_antiviral/antibiotic	Europe	Spain	2500	Adults	All	1	Open label	1	0	1	1	Hospitalised/Severe/ICU	Recruiting	2020-03-26	Xsearch EUCTR	An international randomised trial of additional treatments for COVID-19 in hospitalised patients who are all receiving the local standard of care	An international randomised trial of add	Hospitalised	Remdesivir 100mg iv/Hydroxychloroquine 250mg orally/ Hydroxychloroquine 200mg orally/lopinavir 200mg orally /INF-beta 152mikrg parenteral	SCREN-UICEC	AM/AV	Chloroquine/Remdesivir/lopinavir-retinavir/INF-beta	All-cause in-hospital mortality	fibucicec.hcsc@salud.madrid.org	+349133030007360	FIB-HCSC	Randomized, parallel, open label, 5-arm, multicenter	Hospitalized with COVID-19	Interventional											18
EUCTR2020-001113-21	606	366	https://www.clinicaltrialsregister.eu/ctr-search/trial/2020-001113-21/GB	inclusion	1		Chloroquine/Lopinavir/ritonavir/azithromycin	Other drug combinations	Europe	United Kingdom	1000	Adults	All	3	Open label	1	0	1	1	Hospitalised/Severe/ICU	Recruiting	2020-03-19	Xsearch EUCTR	Randomised Evaluation of COVID-19 Therapy (RECOVERY)	Randomised Evaluation of COVID-19 Therap	Hospitalised	4-arm: Lopinavir 200mg orally, ritonavir 50mg, Glucocorticoide 6mg orally, hydroxychloroquine 155mg orally, azithromycin iv vs SoC		AM/AV/AB	Lopinavir/ritonavir/hydroxychloroquine/azithromycin	All-cause 28 days mortality			University of Oxford	Randomized, 4-arm, parallel, open label, multicenter	COVID-19 infection	Interventional											18
EUCTR2020-001310-38	608	367	https://www.clinicaltrialsregister.eu/ctr-search/trial/2020-001310-38/DE	inclusion	1		Convalescent Plasma	Antibodies	Europe	Germany	106	Adults	All	1	Open label		0		1	Hospitalised/Severe/ICU	Recruiting	2020-03-31	Xsearch EUCTR	A randomized, prospective, open label clinical trial on the use of convalescent plasma compared to best supportive care in patients with severe COVID-19	A randomized, prospective, open label cl	Severe	FFP iv vs SoC	Sixten Körper	IT	Convalescent plasma	Composite survival and clinical improvement day 21	s.koerper@blutspende.de	0049731150519	IKT Ulm	Randomized, parallel, open label	ICU requirement COVID-19	Interventional											18
EUCTR2020-001307-16	610	368	https://www.clinicaltrialsregister.eu/ctr-search/trial/2020-001307-16/ES	inclusion	1		Glucocorticoid	Glucocorticoid	Europe	Spain	104	Adults	All	1	Open label	1	0	1	0	Hospitalised/Severe/ICU	Recruiting	2020-04-08	Xsearch EUCTR	Efficacy and Safety of corticoids in patients with adult respiratory distress syndrome (ARDS) secondary to COVID-19.	Efficacy and Safety of corticoids in pat	Severe	Methylprednisolone inhaled vs SoC	Anabel Sánchez	AI	Methylprednisolone inhaled	28 days mortality	anabelsanchez.hrc@gmail.com	+34913368825	Fundación para la Investigación Biomédica Hospital Ramón y Cajal	Randomized, parallel, open label	ARDS in COVID-19	Interventional											18
ChiCTR2000030055	611	369	http://www.chictr.org.cn/showproj.aspx?proj=49864	Inclusion	1		Dipyridamole	Other	Asia	China	460	Adults	All	1	Not specified		0		1	Diagnosed/suspected COVID	Recruiting	2020-02-22	ChiCTR	Multicenter study for the treatment of Dipyridamole with novel coronavirus pneumonia (COVID-19)	Multicenter study for the treatment of D	Pneumonia	Routine treatment group:Conventional treatment of 2019-nCoV pneumonia;Dipyridamole treatment group:Conventional treatment of 2019-nCoV pneumonia and Dipyridamole;	Qingling Zhang	AT	Dipyridamole	Complete blood count	zqling68@hotmail.com	+86 13609068871	The First Affiliated Hospital of Guangzhou Medical University	Parallel	2019-nCoV pneumonia	Interventional	16 March 2020						The First Affiliated Hospital of Guangzhou Medical University	20200222	4/7/2020 10:40:56 AM	No	18	70
IRCT20200328046886N1	1004	370	https://www.irct.ir/trial/46885	Inclusion	1		Sovodak	Antiviral	Asia	Iran	48	Adults	All	3	Double blind		0		0	Hospitalised/Severe/ICU	Completed	12/04/2020	Xsearch IRCT			Hospitalised	Intervention group patients will be recieved Sovodak tablet (Sofosbuvir 400mg/Daclatasvir 60mg) + Ribavirin	Hamideh Abbaspour	Sovodak		Need of invasive and non-invasive mechanical ventiliation, need of oxygen, recovery time	dr.abbaspour1@yahoo.com	+98 11 4203 1035	Mazandaran University of Medical Sciences	Randomized, parallel, doube blind	dr.abbaspour1@yahoo.com	Evaluation of efficacy and safety of Sovodak (Sofosbuvir+Daclatasvir) in combination with Ribavirin for mild to moderate hospitalized Covid-19 patients compared to standard care regimen (a randomized controlled trial)					Mazandaran University of Medical Sciences		4/13/2020		18	85	05/03/2020
IRCT20180520039738N2	1005	371	https://www.irct.ir/trial/46974	Inclusion	1		Vitamin A	Dietary supplements	Asia	Iran	140	Both	All	3	Double blind	0	0		0	Diagnosed/suspected COVID	Completed	10/04/2020	Xsearch IRCT			Confirmed	Vitamin A in treatment in covid19 patients	Mohamadreza Rohani	Vitamin A		Clinical parameters, blod counts, CRP, organ markers	mohamadreza.rohani@yahoo.com	+98 21 4460 4118	Saveh University of Medical Sciences	Randomized, parallel, doube blind	mohamadreza.rohani@yahoo.com	Comparison of the effectiveness of standard treatment with stand treatment plus Vitamin A in treatment in covid19 patients					Saveh University of Medical Sciences		4/13/2020		1	75	07/04/2020
IRCT20200404046934N1	1006	372	https://www.irct.ir/trial/46913	Inclusion	1		Zufa syrup	UCM	Asia	Iran	130	Adults	All	3	Triple blind	0	0		0	Diagnosed/suspected COVID	Completed	13/04/2020	Xsearch IRCT			Pneumonia	Zufa syrup 6 times a day	Majid Asghari	Zufa syrup		Clinical signs, oxygen levels	asghari.rall@gmail.com	+98 25 3612 2058	Ghoum University of Medical Sciences	Randomized, parallel, tripple blind	asghari.rall@gmail.com	Investigation of the effect of Zufa syrup on clinical symptoms in the with suspected Corona(COVID-19)					Deouty of Research & Technology Qom University of Medical Sciences		4/13/2020		20	70	10/03/2020
IRCT20200404046933N1	1008	373	https://www.irct.ir/trial/46893	Inclusion	1		Licorice	UCM	Asia	Iran	40	Adults	All	2	Double blind	0	0		0	Mild/moderate	Recruiting	12/04/2020	Xsearch IRCT			Non-hospitalised	licorice capsules	Gholamreza Karimi	licorice extract		Clinical improvement, lymphopenia, CRP	karimig@mums.ac.ir	+98 51 3180 1191	Mashhad University of Medical Sciences	Randomized, parallel, doube blind	karimig@mums.ac.ir	Evaluation the effect of aqueous extract of licorice on coronavirus outpatients: A randomized, double-blind, placebo-controlled clinical trial					Mashhad University of Medical Sciences		4/13/2020		18	65	20/04/2020
IRCT20151227025726N14	1009	374	https://www.irct.ir/trial/46942	Inclusion	1		Favipiravir	Antiviral	Asia	Iran	84	Adults	All	3	Open label	0	1	1	0	Hospitalised/Severe/ICU	Recruiting	10/04/2020	Xsearch IRCT			Hospitalised	Favipiravir (Toliddaru-Sobhan Oncology company, Iran) at dose of 1600 mg BID for one day and then 600 mg BID for totally 7 days. In Lopinavir-ritonavir group, patients receive Lopinavir-ritonavir (Heterd company, India) at dose of 200/50 mg two tablets BID for 7 days	Farzaneh Dastan	Favipiravir		Clinical parameters	f_dastan@sbmu.ac.ir	+98 912 270 5933	Shahid Beheshti University of Medical Sciences	Randomized, parallel, open label	f_dastan@sbmu.ac.ir	Evaluation the efficacy and safety of Favipiravir made by Shahid Beheshti University of Medical Sciences in comparison with Lopinavir-ritonavir in COVID-19 patients					Shahid Beheshti University of Medical Sciences		4/13/2020		18		05/04/2020
IRCT20200317046797N3	1010	375	https://www.irct.ir/trial/47014	Inclusion	1		IVIG	Other immunotherapeutics	Asia	Iran	100	Adults	All	3	Open label	1	0	1	0	Diagnosed/suspected COVID	Recruiting	11/04/2020	Xsearch IRCT			Confirmed	tandard regimen for COVID-19 plus intravenous immunoglobulin (IVIG)	Sepideh Zununi Vahed	IVIG		Clinical improvement, in-hispital mortality, intubation	sepide.zununi@gmail.com	+98 41 3336 9331	Tabriz University of Medical Sciences	Randomized, parallel, open label	sepide.zununi@gmail.com	Intravenous immunoglobulin (IVIG) in the treatment of COVID-19-induced cytokine storm					Tabriz University of Medical Sciences		4/13/2020		18	85	20/04/2020
IRCT20200409047007N1	1011	376	https://www.irct.ir/trial/47058	Inclusion	1		Convalescent Plasma	Antibodies	Asia	Iran	32	Adults	All	N/A	Open label	1	0	1	0	Hospitalised/Severe/ICU	Recruiting	12/04/2020	Xsearch IRCT			Severe	patients were given 500 cc of freshly survivors plasma every other day up to 3 times.	Mohsen Seddigh-Shamsi	survivors plasma		Mortality 1 month	seddighshamsim@mums.ac.ir	+98 51 3859 8818	Mashhad University of Medical Sciences	Randomized, parallel, doube blind	seddighshamsim@mums.ac.ir	The effect of plasma administration of COVID-19 survivors in patients with acute respiratory distress syndrome due to COVID-19					Mashhad University of Medical Sciences		4/13/2020		50	75	13/04/2020
IRCT20200403046926N1	1013	377	https://www.irct.ir/trial/46926	Inclusion	1		Sovodak	Antiviral	Asia	Iran	60	Both	All	3	Open label	0	0		0	Diagnosed/suspected COVID	Completed	11/04/2020	Xsearch IRCT			Pneumonia	The intervention group will receive hydroxychloroquine + SOVODAK and the comparison group will receive hydroxychloroquine.	Fatemeh Roozbeh	Sovodak		Clinical improvement, lymphopenia, CRP, saturation	roozbeh@mazums.ac.ir	+98 11 3310 8690	Mazandaran University of Medical Sciences	Randomized, parallel, open label	roozbeh@mazums.ac.ir	The effect of adding SOVODAK (sofosbuvir+daclatasvir) to the treatment protocol of COVID-19 outpatients: A Clinical Trial Study					Mazandaran University of Medical Sciences		4/13/2020				08/04/2020
IRCT20161204031229N3	1015	378	https://www.irct.ir/trial/46814	Inclusion	1		Teicoplanin	Antibiotics/antifungal	Asia	Iran	40	Both	All	3	Open label	0	0		0	Diagnosed/suspected COVID	Completed	08/04/2020	Xsearch IRCT			Confirmed	Teicoplanin group: will receive standard regimen for COVID-19 plus teicoplanin 400 mg/daily for 7 days.	Azadeh Eshraghi	Teicoplanin		Clinical improvement	eshraghi.a@iums.ac.ir	+98 86709	Department of Clinical Pharmacy, Faculty of Pharmacy-International Campus, Iran University of Medica	Randomized, parallel, open label	eshraghi.a@iums.ac.ir	Study of the Efficacy of Teicoplanin on mortality rate of patients with COVID-19 Infection: A randomized clinical trial					Iran University of Medical Sciences		4/13/2020				30/03/2020
IRCT20200402046923N1	1016	379	https://www.irct.ir/trial/46879	Inclusion	1		Fenugreek syrup	UCM	Asia	Iran	110	Adults	All	3	Open label	0	0		0	Diagnosed/suspected COVID	Completed	09/04/2020	Xsearch IRCT			Confirmed	Intervention group: Received medications according national guideline plus Viroherb capsule (2 caps bid) and Fenugreek syrup (10 cc qid)	Roja Rahimi	Fenugreek syrup		Clinical improvement, blood count, CRP, CT scan	rojarahimi@gmail.com	+98 21 8899 0835	Tehran University of Medical Sciences	Randomized, parallel, open label	rojarahimi@gmail.com	Effects of Viroherb capsule and Fenugreek syrup derived from traditional Persian medicine on clinical and paraclinical outcomes and survival of patients with mild to moderate COVID-19 hospitalized in medical centers of Tehran University of Medical Sciences					Tehran University of Medical Sciences		4/13/2020		18		05/04/2020
IRCT20081019001369N3	1017	380	https://www.irct.ir/trial/46978	Inclusion	1		crocetin	UCM	Asia	Iran	40	Adults	All	2	Double blind	0	0		0	Mild/moderate	Recruiting	11/04/2020	Xsearch IRCT			Non-hospitalised	In addition to the common anti coronavirus drugs, the treatment group also receives crocetin capsules.	Hossein Hosseinzadeh	crocetin		Clinical improvement	hosseinzadehh@mums.ac.ir	+98 51 3180 1193	Mashhad University of Medical Sciences	Randomized, parallel, doube blind	hosseinzadehh@mums.ac.ir	Clinical trial of the effect of crocetin in improving the clinical and laboratory symptoms of patients with COVID-19					Mashhad University of Medical Sciences		4/13/2020		18	65	20/04/2020
IRCT20150808023559N20	1018	381	https://www.irct.ir/trial/47022	Inclusion	1		Chloroquine + other	Antimalaria_antiviral/antibiotic	Asia	Iran	100	Adults	All	2	Open label	1	0	1	0	Hospitalised/Severe/ICU	Recruiting	11/04/2020	Xsearch IRCT			Hospitalised	Intervention group: Group receiving Favipiravir plus Hydroxychloroquine. Stat dose of eight 200 mg Favipiravir tablets (total 1600 mg) followed by Favipiravir 600 mg three times a day for 7 days plus Hydroxychloroquine 200mg two times per day for 7 days	Somaieh Matin	hydroxychloroquine plus favipiravir		Mortality in-hospital	s.matin@arums.ac.ir	+98 45 3373 3011	Ardabil University of Medicine Sciences	Randomized, parallel, open label	s.matin@arums.ac.ir	Evaluation of safety and efficacy of hydroxychloroquine plus favipiravir drug regimen in comparison with hydroxychloroquine plus kaletra in hospitalized patients with COVID-19					Ardabil University of Medical Sciences		4/13/2020		16	100	29/04/2020
IRCT20200406046965N1	1019	382	https://www.irct.ir/trial/46958	Inclusion	1		Elderberry	UCM	Asia	Iran	40	Adults	All	2	Double blind	0	0		0	Diagnosed/suspected COVID	Recruiting	12/04/2020	Xsearch IRCT			Confirmed	The intervention group receives standard anti-coronavirus drugs with elderberry syrup.	Seyed Ahmad Emami	Elderberry		Clinical improvement	emamia@mums.ac.ir	+98 51 3180 1267	Mashhad University of Medical Sciences	Randomized, parallel, doube blind	emamia@mums.ac.ir	A comparison of Elderberry (Sambucus nigra) extract syrup and placebo against COVID-19 symptoms in outpatients and home quarantined patients: A randomized double-blind clinical trial					Mashhad University of Medical Sciences		4/13/2020		18	65	20/04/2020
IRCT20081019001369N4	1021	383	https://www.irct.ir/trial/46977	Inclusion	1		Minocycline	Antibiotics/antifungal	Asia	Iran	40	Adults	All	2	Double blind	0	0		0	Diagnosed/suspected COVID	Recruiting	11/04/2020	Xsearch IRCT			Confirmed	In addition to the common anticorona virus drugs, the treatment group also receives minocycline.	Hossein Hosseinzadeh	minocycline		Clinical improvement	hosseinzadehh@mums.ac.ir	+98 51 3180 1193	Mashhad University of Medical Sciences		hosseinzadehh@mums.ac.ir
IRCT20080901001157N16	1022	384	https://www.irct.ir/trial/46907	Inclusion	1		IMFLUNA herbal compound	UCM	Asia	Iran	60	Adults	All	2	Triple blind	0	0		0	Diagnosed/suspected COVID	Completed	08/04/2020	Xsearch IRCT			Confirmed	Intervention group: patients in this group receive two 500 mg capsules of herbal compound three times a day after post meal. Placebo group: patients in this group receive two 500 mg capsules of placebo three times a day after post meal.	Hasan Fallah Huseini	IMFLUNA herbal compound		Saturation, clinical symptoms, inflammation (CT scan)	fallah@imp.ac.ir	+98 26 3476 4010	Institute of Medicinal Plants		fallah@imp.ac.ir
IRCT20151228025732N52	1027	385	https://www.irct.ir/trial/46963	Inclusion	1		Vitamin C/melatonin/zinc	Other drug combinations	Asia	Iran	20	Both	All	3	Open label	0	0		0	Diagnosed/suspected COVID	Completed	13/04/2020	Xsearch IRCT			Confirmed	Melatonin, vitamin C, zink				Number of breaths per minute
EUCTR2020-001290-74	1029	386	https://www.clinicaltrialsregister.eu/ctr-search/trial/2020-001290-74/ES	Inclusion	1		Sarilumab	Anti-IL-6	Europe	Spain	216	Adults	All	3	Open label	0	1	1	0	Diagnosed/suspected COVID	Recruiting	13/04/2020	Xsearch EUCTR			Confirmed	SARILUMAB 200 mg	Ana Aldea	sarilumab		Clinical improvement	aaldea@imim.es	34933160490	Consorci PSMAR
EUCTR2020-001273-73	1031	387	https://www.clinicaltrialsregister.eu/ctr-search/trial/2020-001273-73/FR	Inclusion	1		Zitromax	Antibiotics/antifungal	Europe	France	600	Adults	All	3	Double blind	0	0		0	Prevention	Recruiting		Xsearch EUCTR			Prevention					PCR 3 months
EUCTR2020-001156-18	1033	388	https://www.clinicaltrialsregister.eu/ctr-search/trial/2020-001156-18/ES	Inclusion	1		Chloroquine / Azithromycin	Antimalaria_antiviral/antibiotic	Europe	Spain	1000	Adults	All	3	Open label	1	0	1	1	Mild/moderate	Recruiting	03/04/2020	Xsearch EUCTR			Moderate	Ritonevir, Lopinavir, Dolquine, Azithromycin				Mortality or discharge
EUCTR2020-001160-28	1036	389	https://www.clinicaltrialsregister.eu/ctr-search/trial/2020-001160-28/ES	Inclusion	1		Tocilizumab+pembrolizumab	Other immunotherapeutics	Europe	Spain	24	Adults	All	3	Open label	0	1	1	0	Mild/moderate	Recruiting	13/04/2020	Xsearch EUCTR			Moderate	Tocilizumab + Pembrolizumab				normalization of SpO2 ≥96%
EUCTR2020-001333-13	1037	390	https://www.clinicaltrialsregister.eu/ctr-search/trial/2020-001333-13/FR	Inclusion	1		Chloroquine	Antimalaria	Europe	France	122	Adults	All	3	Open label	1	0	1	1	Diagnosed/suspected COVID	Recruiting	02/04/2020	Xsearch EUCTR			Confirmed	PLAQUENIL 200 mg		Hydroxychloroquine		Mortality day 28	l.lamrani@hml.fr	33140942554	Groupe Hospitalier Paris Saint Joseph - Hôpital Marie Lannelongue
EUCTR2020-001209-22	1043	391	https://www.clinicaltrialsregister.eu/ctr-search/trial/2020-001209-22/GB	Inclusion	1		Chloroquine	Antimalaria	Europe	United Kingdom	3000	Adults	All	3	Open label	1	0	1	1	Diagnosed/suspected COVID	Recruiting	25/03/2020	Xsearch EUCTR			Suspected or confirmed	Hydroxychloroquine				Mortality
ChiCTR2000031735	1050	392	http://www.chictr.org.cn/historyversionpuben.aspx?regno=ChiCTR2000031735	Inclusion	1		NK cells	Other immunotherapeutics	Asia	China	20	Adults	All	1	Not specified	0	0		0	Diagnosed/suspected COVID	Not Recruiting	2020-04-08	Xsearch ChiCTR	Clinical study for natural killer (NK) cells from umbilical cord blood in the treatment of novel coronavirus pneumonia (COVID-19)	Clinical study for natural killer (NK) c	Confirmed	NK cells injection		SC	NK cells	adverse events				Randomized parallel group	COVID-19	Safety trial	08/04/2020
ChiCTR2000031809	1058	393	http://www.chictr.org.cn/historyversionpuben.aspx?regno=ChiCTR2000031809	Inclusion	1		Inactivated novel coronavirus vaccine (Vero cells)	Vaccine	Asia	China	1456	Both	All	2	Double blind	0	0		1	Prevention	Not Recruiting	11/04/2020	Xsearch ChiCTR	A randomized, double-blind, placebo parallel-controlled phase I/II clinical trial for inactivated COVID-19 vaccine (Vero cells)	A randomized, double-blind, placebo para	Prevention	Vaccine		Vaccine	COVID-19 Vaccine	Adverse events							10/04/2020
NCT04334148	1062	394	https://ClinicalTrials.gov/show/NCT04334148	Inclusion	1		Chloroquine	Antimalaria	North America	United States	15000	Adults	All	3	Triple blind	0	0		0	Prevention	Recruiting		Xsearch NCT	Healthcare Worker Exposure Response and Outcomes of Hydroxychloroquine	Healthcare Worker Exposure Response and	Prevention	Drug: Hydroxychloroquine|Drug: Placebo oral tablet			Hydroxychloroquine	Number of participants testing positive for COVID-19 infection				Allocation: Randomized|Intervention Model: Parallel Assignment|Masking: Triple (Participant, Care Provider, Investigator)|Primary Purpose: Prevention	COVID-19		April 6, 2020									Pro00105274
NCT04334265	1064	395	https://ClinicalTrials.gov/show/NCT04334265	Inclusion	1		TCM	UCM	Asia	China	750	Adults	All	N/A	Open label	0	0		0	Diagnosed/suspected COVID	Recruiting		Xsearch NCT	Efficacy and Safety of Anluohuaxian in the Treatment of Rehabilitation Patients With Corona Virus Disease 2019	Efficacy and Safety of Anluohuaxian in t	Confirmed	Drug: Anluohuaxian			Anluohuaxian	Changes in high-resolution computer tomography of the lung|Change in 6-minute walking distance|Changes in compound physiological index|Changes in the scores of the St. George's Hospital Respiratory Questionnaire|Changes in modified British Medical Research Council Dyspnea Scale (mMRC) scores|Changes in vital capacity of the lung				Allocation: Randomized|Intervention Model: Parallel Assignment|Masking: None (Open Label)|Primary Purpose: Treatment	COVID-19		April 6, 2020									2020 research 110
NCT04334382	1066	396	https://ClinicalTrials.gov/show/NCT04334382	Inclusion	1		Chloroquine + other	Other drug combinations	North America	United States	1550	Adults	All	3	Open label	0	0		0	Diagnosed/suspected COVID	Recruiting		Xsearch NCT	Hydroxychloroquine vs. Azithromycin for Outpatients in Utah With COVID-19	Hydroxychloroquine vs. Azithromycin for	Confirmed	Drug: Hydroxychloroquine|Drug: Azithromycin			Chloroquine vs Azithromycin	Hospitalization within 14 days of enrollment|Duration of COVID-19-attributable symptoms|Hospital-free days at 28 days|Ventilator-free days at 28 days|ICU-free days at 28 days				Allocation: Randomized|Intervention Model: Parallel Assignment|Masking: None (Open Label)|Primary Purpose: Treatment	COVID-19		April 6, 2020									1051360
NCT04334460	1068	397	https://ClinicalTrials.gov/show/NCT04334460	Inclusion	1		BLD-2660	Other	North America	United States	120	Adults	All	2	Quadruple blind	0	0		0	Hospitalised/Severe/ICU	Recruiting		Xsearch NCT	Safety and Antiviral Activity of BLD-2660 in COVID-19 Hospitalized Subjects	Safety and Antiviral Activity of BLD-266	Hospitalised	Drug: BLD-2660			BLD-2660	Antiviral Activity|Improvement of oxygenation|Safety & Tolerability: incidence of TEAEs and serious adverse events (SAEs)				Allocation: Randomized|Intervention Model: Parallel Assignment|Masking: Quadruple (Participant, Care Provider, Investigator, Outcomes Assessor)|Primary Purpose: Treatment	Sars-CoV2		April 6, 2020									B-2660-204
NCT04334629	1070	398	https://ClinicalTrials.gov/show/NCT04334629	Inclusion	1		Ibuprofen	Antiinflammatory	Europe	United Kingdom	230	Adults	All	4	Double blind	0	0		1	Hospitalised/Severe/ICU	Recruiting		Xsearch NCT	LIBA Trial in COVID-19	LIBA Trial in COVID-19	Hospitalised	Drug: Ibuprofen				Disease progression|Time to mechanical ventilation|Overall survival|Reduction in proportion of patients who require ventilation|Reduction in length of Critical Care stay|Reduction in length of Hospital stay|Modulation of serum pro- and anti-inflammatory cytokines|Reduction in duration of ventilation|Increase in ventilator-free days				Allocation: Randomized|Intervention Model: Parallel Assignment|Masking: Double (Investigator, Outcomes Assessor)|Primary Purpose: Treatment	Coronavirus|Respiratory Distress Syndrome|SARS-CoV Infection		April 6, 2020									282009
NCT04334928	1073	399	https://ClinicalTrials.gov/show/NCT04334928	Inclusion	1		Chloroquine + other	Other drug combinations	Europe	Spain	4000	Adults	All	3	Double blind	0	0		0	Prevention	Recruiting		Xsearch NCT	Randomized Clinical Trial for the Prevention of SARS-CoV-2 Infection (COVID-19) in Healthcare Personnel	Randomized Clinical Trial for the Preven	Prevention	Drug: Emtricitabine/tenofovir disoproxil|Drug: Hydroxychloroquine|Drug: Placebo: Emtricitabine/tenofovir disoproxil Placebo|Drug: Placebo: Hydroxychloroquine				Number of confirmed symptomatic infections of SARS-CoV-2 (COVID-19)|Severity of disease in confirmed infected participants of SARS-CoV-2 (COVID-19)|Duration of symptoms in confirmed infected participants of SARS-CoV-2 (COVID-19) measured in days				Allocation: Randomized|Intervention Model: Parallel Assignment|Masking: Double (Participant, Investigator)|Primary Purpose: Prevention	Coronavirus Infection		April 6, 2020									PrEP COVID-19
NCT04334980	1076	400	https://ClinicalTrials.gov/show/NCT04334980	Inclusion	1		Bacterial medium bacTRL-Spike	Other	North America	Canada	84	Adults	All	1	Triple blind	0	0		0	Prevention	Not Recruiting		Xsearch NCT	Evaluating the Safety, Tolerability and Immunogenicity of bacTRL-Spike Vaccine for Prevention of COVID-19	Evaluating the Safety, Tolerability and	Prevention	Biological: bacTRL-Spike|Other: Placebo				Frequency of Adverse Events|SARS-CoV-2 Antibodies|Incidence of COVID-19 infection|bacTRL-Spike in stool post-vaccination				Allocation: Randomized|Intervention Model: Parallel Assignment|Masking: Triple (Participant, Care Provider, Investigator)|Primary Purpose: Prevention	COVID-19		April 6, 2020									bacTRL-Spike-1
NCT04335071	1079	401	https://ClinicalTrials.gov/show/NCT04335071	Inclusion	1		Tocilizumab	Anti-IL-6	Europe	Switzerland	100	Adults	All	2	Quadruple blind	1	0	1	1	Hospitalised/Severe/ICU	Recruiting		Xsearch NCT	Tocilizumab in the Treatment of Coronavirus Induced Disease (COVID-19)	Tocilizumab in the Treatment of Coronavi	Hospitalised	Drug: Tocilizumab (TCZ)|Drug: Placebo				Number of patients with ICU admission|Number of patients with intubation|Number of patients with death|Illness severity|Number of patients with clinical improvement|Time to clinical improvement (days)|Duration of hospitalization (days)|Time to ICU admission (days)|Duration of ICU stay|Time to intubation|Duration of mechanical ventilation (days)				Allocation: Randomized|Intervention Model: Parallel Assignment|Masking: Quadruple (Participant, Care Provider, Investigator, Outcomes Assessor)|Primary Purpose: Treatment	SARS-CoV-2 Infection		April 6, 2020									2020-00691|2020DR2044
NCT04335136	1083	402	https://ClinicalTrials.gov/show/NCT04335136	Inclusion	1		rhACE2	Antihypertensiva	Europe	Austria	200	Adults	All	2	Double blind	0	1	1	0	Hospitalised/Severe/ICU	Recruiting		Xsearch NCT	Recombinant Human Angiotensin-converting Enzyme 2 (rhACE2) as a Treatment for Patients With COVID-19	Recombinant Human Angiotensin-converting	Hospitalised	Drug: RhACE2 APN01|Drug: Physiological saline solution				Cause of death or invasive mechanical ventilation|LDH level|Mortality|VFD|Time to death				Allocation: Randomized|Intervention Model: Parallel Assignment|Masking: Double (Participant, Investigator)|Primary Purpose: Treatment	COVID-19		April 6, 2020									APN01-01-COVID19
NCT04335305	1088	403	https://ClinicalTrials.gov/show/NCT04335305	Inclusion	1		Tocilizumab/Pembrolizumab	Other immunotherapeutics	Europe	Spain	24	Adults	All	2	Open label	0	1	1	1	Hospitalised/Severe/ICU	Recruiting		Xsearch NCT	Checkpoint Blockade in COVID-19 Pandemic	Checkpoint Blockade in COVID-19 Pandemic	Severe	Drug: Tocilizumab|Biological: Pembrolizumab (MK-3475)				Percentage of patients with normalization of SpO2 ‚â•96%|Proportion of patients with temperature < 37,5 ¬∞C armpit.|Proportion of patients discharged from the emergency department and classified as low risk|Change from baseline in organ failure parameters|Proportion of mortality rate|Analysis of the remission of respiratory symptoms|Evaluation of the radiological response|Time to first negative i…				Allocation: Randomized|Intervention Model: Parallel Assignment|Masking: None (Open Label)|Primary Purpose: Treatment	COVID-19|Pneumonia, Viral		April 6, 2020									MedOPP376
NCT04335552	1089	404	https://ClinicalTrials.gov/show/NCT04335552	Inclusion	1		Chloroquine / Azithromycin	Antimalaria_antiviral/antibiotic	North America	United States	500	Both	All	2	Open label	0	1	1	0	Hospitalised/Severe/ICU	Recruiting		Xsearch NCT	Pragmatic Factorial Trial of Hydroxychloroquine, Azithromycin, or Both for Treatment of Severe SARS-CoV-2 Infection	Pragmatic Factorial Trial of Hydroxychlo	Severe	Other: Standard of care|Drug: Hydroxychloroquine|Drug: Azithromycin				World Health Organization (WHO) ordinal scale measured at 14 days after enrollment|Rates of death during the index hospitalization|Number of days on mechanical ventilation for patients who were on mechanical ventilation at baseline|Proportion of patients not receiving mechanical ventilation at baseline who progress to requiring mechanical ventilation during the index hospitalization|WHO ordinal s…				Allocation: Randomized|Intervention Model: Factorial Assignment|Masking: None (Open Label)|Primary Purpose: Treatment	SARS-CoV-2		April 6, 2020									PRO00105339
NCT04335786	1093	405	https://ClinicalTrials.gov/show/NCT04335786	Inclusion	1		Valsartan	Antihypertensiva	Europe	Netherlands	651	Adults	All	4	Quadruple blind	1	0	1	0	Hospitalised/Severe/ICU	Recruiting		Xsearch NCT	Valsartan for Prevention of Acute Respiratory Distress Syndrome in Hospitalized Patients With SARS-COV-2 (COVID-19) Infection Disease	Valsartan for Prevention of Acute Respir	Hospitalised	Drug: Valsartan (Diovan)|Drug: Placebo oral tablet				first occurrence of intensive care unit admission, mechanical ventilation or death|Death|Mechanical ventilation|Intensive care unit admission|Occurrence of acute kidney injury				Allocation: Randomized|Intervention Model: Parallel Assignment|Masking: Quadruple (Participant, Care Provider, Investigator, Outcomes Assessor)|Primary Purpose: Treatment	Respiratory Distress Syndrome, Adult|SARS-CoV-2		April 6, 2020									NL73547.091.20|2020-001320-34
NCT04336332	1097	406	https://ClinicalTrials.gov/show/NCT04336332	Inclusion	1		Chloroquine / Azithromycin	Antimalaria_antiviral/antibiotic	North America	United States	160	Adults	All	2	Open label	0	0		0	Diagnosed/suspected COVID	Recruiting		Xsearch NCT	Randomized Comparison of Combination Azithromycin and Hydroxychloroquine vs. Hydroxychloroquine Alone for the Treatment of Confirmed COVID-19	Randomized Comparison of Combination Azi	Confirmed	Combination Product: Hydroxychloroquine Sulfate + Azithromycin|Drug: Hydroxychloroquine Sulfate				Changes in patients viral load|Second evaluation of changes in patients viral load|Symptom questionnaire|Fever assessment|Vital Signs - Body Temperature|Discharge|Recovery|Assessment of agent toxicity|Oropharynx swab sample collections|Blood Sample collections|Viral shedding assessment - nasopharyngeal secretions|Viral shedding assessment - serology|Cytokines in blood				Allocation: Randomized|Intervention Model: Parallel Assignment|Masking: None (Open Label)|Primary Purpose: Treatment	SARS-CoV-2|COVID-19		April 7, 2020									002011|Pro2020000712
NCT04336462	1101	407	https://ClinicalTrials.gov/show/NCT04336462	Inclusion	1		Oxygen nebulizer	Respiratory adjuncts (ventilator / gas)	Asia	China	100	Adults	All	N/A	Quadruple blind	0	0		1	Diagnosed/suspected COVID	Recruiting		Xsearch NCT	Hydrogen-Oxygen Generator With Nebulizer in the Improvement of Symptoms in Patients Infected With COVID-19	Hydrogen-Oxygen Generator With Nebulizer	Confirmed	Device: oxyhydrogen|Device: Oxygen				Recovery time|Clinical Symptom Remission time|fever duration|Leicester cough questionaire (LCQ)|minimum oxygen|Negative conversion rate|white blood cell(WBC)|Red blood cells(RBC)|Hemoglobin(Hb )|Platelets(PLT)|Lymphocyte count|The percentage of lymphocyte|neutrophils|C-reactive protein (CRP)|Myocardial enzyme|liver function|Renal function|Muscle enzyme				Allocation: Randomized|Intervention Model: Parallel Assignment|Masking: Quadruple (Participant, Care Provider, Investigator, Outcomes Assessor)|Primary Purpose: Treatment	COVID-19		April 7, 2020									JT202002LZ
NCT04336748	1103	408	https://ClinicalTrials.gov/show/NCT04336748	Inclusion	1		Chloroquine	Antimalaria	Europe	Austria	440	Adults	All	3	Triple blind	0	0		0	Prevention	Not Recruiting		Xsearch NCT	HCQ for Primary Prophylaxis Against COVID19 in Health-care Workers	HCQ for Primary Prophylaxis Against COVI	Prevention	Drug: Hydroxychloroquine				Symptomatic or asymptomatic SARS-CoV-2 infection confirmed by PCR|Viral load during SARS-CoV-2 infection|Seroconversion during the study period|Incidence of any acute respiratory infection|Days of sick leave				Allocation: Randomized|Intervention Model: Parallel Assignment|Masking: Triple (Participant, Care Provider, Investigator)|Primary Purpose: Prevention	Sars-CoV2|Infection Viral|Healthcare Worker|Prophylaxis		April 7, 2020									HCQ prophylaxis for COVID19
NCT04336904	1107	409	https://ClinicalTrials.gov/show/NCT04336904	Inclusion	1		Favipiravir	Antiviral	Europe	Italy	100	Adults	All	3	Double blind	0	1	1	1	Mild/moderate	Not Recruiting		Xsearch NCT	Clinical Study To Evaluate The Performance And Safety Of Favipiravir in COVID-19	Clinical Study To Evaluate The Performan	Moderate	Drug: Favipiravir|Other: Placebo				Time from randomization to clinical recovery|Time from randomization to negativity in RT-PCR nucleic acid test|Incidence of deterioration/aggravation of pneumonia|Time from randomization to resolution of pyrexia|Time from randomization to relief of cough|Time from randomization to relief of dyspnoea|Rate of auxiliary oxygen therapy|ICU admission rate|Mortality				Allocation: Randomized|Intervention Model: Parallel Assignment|Masking: Double (Participant, Care Provider)|Primary Purpose: Treatment	COVID-19		April 7, 2020									HS216C17-PHASE III
NCT04338074	1127	410	https://ClinicalTrials.gov/show/NCT04338074	Inclusion	1		Tranexamic acid	Other	North America	United States	100	Adults	All	2	Quadruple blind	0	0		0	Diagnosed/suspected COVID	Recruiting		Xsearch NCT	TXA and Corona Virus 2019 (COVID19) in Outpatients	TXA and Corona Virus 2019 (COVID19) in O	Confirmed	Drug: Tranexamic acid tablets|Drug: Placebo oral tablet				Hospitalization				Allocation: Randomized|Intervention Model: Parallel Assignment|Masking: Quadruple (Participant, Care Provider, Investigator, Outcomes Assessor)|Primary Purpose: Treatment	COVID-19		April 8, 2020									TXACOVID1
NCT04338126	1129	411	https://ClinicalTrials.gov/show/NCT04338126	Inclusion	1		Tranexamic acid	Other	North America	United States	60	Adults	All	2	Quadruple blind	0	0		0	Hospitalised/Severe/ICU	Not Recruiting		Xsearch NCT	Tranexamic Acid (TXA) and Corona Virus 2019 (COVID19) in Inpatients	Tranexamic Acid (TXA) and Corona Virus 2	Hospitalised	Drug: Tranexamic acid|Drug: Placebo oral tablet				Admission to Intensive Care Unit				Allocation: Randomized|Intervention Model: Parallel Assignment|Masking: Quadruple (Participant, Care Provider, Investigator, Outcomes Assessor)|Primary Purpose: Treatment	COVID19		April 8, 2020									TXACOVID2
NCT04338698	1134	412	https://ClinicalTrials.gov/show/NCT04338698	Inclusion	1		Chloroquine + other	Other drug combinations	Asia	Pakistan	500	Adults	All	3	Double blind	0	1	1	1	Diagnosed/suspected COVID	Not Recruiting		Xsearch NCT	Hydroxychloroquine, Oseltamivir and Azithromycin for the Treatment of COVID-19 Infection: An RCT	Hydroxychloroquine, Oseltamivir and Azit	Confirmed	Drug: Hydroxychloroquine|Drug: Oseltamivir|Drug: Azithromycin				Laboratory Result|Clinical Outcome				Allocation: Randomized|Intervention Model: Parallel Assignment|Masking: Double (Investigator, Outcomes Assessor)|Primary Purpose: Treatment	COVID 19		April 8, 2020									12(06)/2016-Coord
NCT04338802	1135	413	https://ClinicalTrials.gov/show/NCT04338802	Inclusion	1		Nintedanib	Other	Asia	China	96	Adults	All	2	Open label	0	0		0	Hospitalised/Severe/ICU	Not Recruiting		Xsearch NCT	Efficacy and Safety of Nintedanib in the Treatment of Pulmonary Fibrosis in Patients With Moderate to Severe COVID -19	Efficacy and Safety of Nintedanib in the	Severe	Drug: Nintedanib 150 MG|Other: Placebo				Changes in forced vital capacity (FVC)|Changes in carbon monoxide dispersion (DLco%)|Changes in the six-minute walk test (6MWT)|Changes in High resolution CT score				Allocation: Randomized|Intervention Model: Parallel Assignment|Masking: None (Open Label)|Primary Purpose: Treatment	COVID-19|Nintedanib|Safety|Effect of Drugs		April 8, 2020									huilanz Zhang
NCT04338828	1136	414	https://ClinicalTrials.gov/show/NCT04338828	Inclusion	1		Nitric Oxide	Respiratory adjuncts (ventilator / gas)	North America	United States	260	Adults	All	2	Triple blind	0	1	1	0	Mild/moderate	Recruiting		Xsearch NCT	Nitric Oxide Inhalation Therapy for COVID-19 Infections in the ED	Nitric Oxide Inhalation Therapy for COVI	Moderate	Drug: Nitric Oxide Gas|Other: Inhaled Supplemental Oxygen				Rates of return visits to the ED|Inpatient hospitalizations required|Rates of intubation|Rates of mortality				Allocation: Randomized|Intervention Model: Parallel Assignment|Masking: Triple (Participant, Care Provider, Investigator)|Primary Purpose: Treatment	COVID19		April 8, 2020									2019P00XXXX
NCT04338906	1138	415	https://ClinicalTrials.gov/show/NCT04338906	Inclusion	1		Chloroquine + other	Other drug combinations	Europe	Germany	334	Adults	All	4	Quadruple blind	0	1	1	0	Hospitalised/Severe/ICU	Not Recruiting		Xsearch NCT	Combination Therapy With Camostat Mesilate + Hydroxychloroquine for COVID-19	Combination Therapy With Camostat Mesila	Hospitalised	Drug: Camostat Mesilate|Drug: Placebo|Drug: Hydroxychloroquine				Not hospitalized|Time to improvement of 2 categories from admission on a 7-point ordinal scale|Proportion of participants in each group with normalization of fever|Proportion of participants in each group with oxygen saturation > 94% on room air for >24h|Time to fever normalization (if febrile at baseline)|Time to first negative SARS-CoV-2 PCR in NP swap (if pos. at baseline)|Time to first negati…				Allocation: Randomized|Intervention Model: Parallel Assignment|Masking: Quadruple (Participant, Care Provider, Investigator, Outcomes Assessor)|Primary Purpose: Treatment	COVID		April 8, 2020									CLOCC-2020
NCT04339660	1147	416	https://ClinicalTrials.gov/show/NCT04339660	Inclusion	1		Stem cells	Stem cells	Asia	China	30	Adults	All	2	Triple blind	0	1	1	0	Diagnosed/suspected COVID	Recruiting		Xsearch NCT	Clinical Research of Human Mesenchymal Stem Cells in the Treatment of COVID-19 Pneumonia	Clinical Research of Human Mesenchymal S	Confirmed	Biological: UC-MSCs|Other: Placebo				The immune function (TNF-Œ± „ÄÅIL-1Œ≤„ÄÅIL-6„ÄÅTGF-Œ≤„ÄÅIL-8„ÄÅPCT„ÄÅCRP)|Blood oxygen saturation|Rate of mortality within 28-days|Size of lesion area by chest imaging|CD4+ and CD8+ T cells count|Peripheral blood count recovery time|Duration of respiratory symptoms (fever, dry cough, difficulty breathing, etc.)|COVID-19 nucleic acid negative time				Allocation: Randomized|Intervention Model: Parallel Assignment|Masking: Triple (Participant, Care Provider, Outcomes Assessor)|Primary Purpose: Treatment	COVID-19		April 9, 2020									Pr20200402
NCT04339816	1151	417	https://ClinicalTrials.gov/show/NCT04339816	Inclusion	1		Chloroquine / Azithromycin	Antimalaria_antiviral/antibiotic	Europe	Czech Republic	240	Adults	All	3	Triple blind	0	1	1	1	Hospitalised/Severe/ICU	Recruiting		Xsearch NCT	Azithromycin Added to Hydrochloroquine in Patients Admitted to Intensive Care With COVID-19: Randomised Controlled Trial	Azithromycin Added to Hydrochloroquine i	Severe	Drug: Azithromycin|Drug: Hydroxychloroquine|Drug: Placebo				Proportion of alive patients free off mechanical ventilation|Proportion of patients who avoided the need of mechanical ventilation|ICU LOS|Mortality28|Mortality90				Allocation: Randomized|Intervention Model: Parallel Assignment|Masking: Triple (Participant, Care Provider, Outcomes Assessor)|Primary Purpose: Treatment	COVID-19|Respiratory Failure		April 9, 2020									AZIQUINE-ICU-25032020|2020-001456-18
NCT04340349	1158	418	https://ClinicalTrials.gov/show/NCT04340349	Inclusion	1		Chloroquine	Antimalaria	North America	Mexico	100	Adults	All	1	Triple blind	0	0		0	Prevention	Recruiting		Xsearch NCT	Low-dose Hydroxychloroquine and Bromhexine: a Novel Regimen for COVID-19 Prophylaxis in Healthcare Professionals	Low-dose Hydroxychloroquine and Bromhexi	Prevention	Drug: Hydroxychloroquine Sulfate|Drug: Bromhexine 8 MG				Polymerase chain reaction assay (PCR) negative at day 0 plus negative serological panel for COVID-19 antibodies at enrolment.|Polymerase chain reaction assay (PCR) negative at day 30.|Polymerase chain reaction assay (PCR) negative at day 60.				Allocation: Randomized|Intervention Model: Parallel Assignment|Masking: Triple (Participant, Care Provider, Investigator)|Primary Purpose: Prevention	Hydroxychloroquine|Antimalarials|Enzyme Inhibitors|Antirheumatic Agents		April 9, 2020									20/20
NCT04340544	1162	419	https://ClinicalTrials.gov/show/NCT04340544	Inclusion	1		Chloroquine	Antimalaria	North America	United States	2700	Adults	All	3	Quadruple blind	0	1	1	0	Mild/moderate	Recruiting		Xsearch NCT	Hydroxychloroquine for the Treatment of Mild COVID-19 Disease	Hydroxychloroquine for the Treatment of	Mild	Drug: Hydroxychloroquine|Drug: Placebo				Difference in time to resolution of clinical signs and symptoms of mild COVID-19 treated with hydroxychloroquine or placebo as assessed by daily self-assessment|Difference between hydroxychloroquine- and placebotreated patients on an ordinal outcome scale until Day 28 (death, admission to intensive care, hospitalization, continuing disease, recovered)|All-cause mortality within 28 days				Allocation: Randomized|Intervention Model: Parallel Assignment|Masking: Quadruple (Participant, Care Provider, Investigator, Outcomes Assessor)|Primary Purpose: Treatment	COVID-19		April 9, 2020									COMIHY
NCT04340557	1163	420	https://ClinicalTrials.gov/show/NCT04340557	Inclusion	1		Losartan	Antihypertensiva	North America	United States	200	Adults	All	4	Open label	0	0		1	Mild/moderate	Recruiting		Xsearch NCT	Do Angiotensin Receptor Blockers Mitigate Progression to Acute Respiratory Distress Syndrome With SARS-CoV-2 Infection	Do Angiotensin Receptor Blockers Mitigat	Mild/moderate	Drug: Losartan				Mechanical ventilation|ICU transfer|Oxygen therapy				Allocation: Randomized|Intervention Model: Parallel Assignment|Masking: None (Open Label)|Primary Purpose: Prevention	SARS-CoV Infection		April 9, 2020									COVID-ARB|2003902
NCT04341116	1168	421	https://ClinicalTrials.gov/show/NCT04341116	Inclusion	1		TJ003234	Other immunotherapeutics	North America	United States	144	Adults	All	2	Quadruple blind	0	1	1	1	Hospitalised/Severe/ICU	Recruiting		Xsearch NCT	Study of TJ003234 (Anti-GM-CSF Monoclonal Antibody) in Subjects With Severe Coronavirus Disease 2019 (COVID-19)	Study of TJ003234 (Anti-GM-CSF Monoclona	Hospitalised	Drug: TJ003234|Drug: Placebo				Proportion (%) of subjects experiencing deterioration in clinical status|Treatment Emergent Adverse Events|Clinical status|Improvement in clinical status|Sequential Organ Failure Assessment (SOFA) score|Change from baseline in PaO2/ FiO2|Length of time to normalization of oxygen saturation|Change from baseline in percentage of subjects requiring mechanical ventilation|Change from baseline in Gluc…				Allocation: Randomized|Intervention Model: Parallel Assignment|Masking: Quadruple (Participant, Care Provider, Investigator, Outcomes Assessor)|Primary Purpose: Treatment	Coronavirus Disease 2019 COVID-19		April 10, 2020									TJ003234COV201
NCT04341285	1172	422	https://ClinicalTrials.gov/show/NCT04341285	Inclusion	1		ECMO	Other	Europe	Germany	200	Adults	All	N/A	Open label	1	0	1	0	Hospitalised/Severe/ICU	Not Recruiting		Xsearch NCT	Early Versus Late ECMO Therapy in COVID-19 Induced ARDS (ECMO-VID)	Early Versus Late ECMO Therapy in COVID-	Severe	Procedure: ECMO Implantation				28 day all cause mortality|90 day all cause mortality|Sepsis-related organ failure assessment score at day 1-14, 28 and 90 days|duration of mechanical ventilation support|Ventilator Associated Pneumonia|Bleeding complications|Acute Renal Failure|Discharge Location				Allocation: Randomized|Intervention Model: Parallel Assignment|Masking: None (Open Label)|Primary Purpose: Treatment	ARDS, Human|COVID-19		April 10, 2020									ECMO-VID
NCT04341389	1173	423	https://ClinicalTrials.gov/show/NCT04341389	Inclusion	1		Vaccine Adenovirus	Vaccine	Asia	China	500	Adults	All	2	Double blind	0	0		0	Prevention	Not Recruiting		Xsearch NCT	A Phase II Clinical Trial to Evaluate the Recombinant Novel Coronavirus Vaccine (Adenovirus Vector)	A Phase II Clinical Trial to Evaluate th	Prevention	Biological: Recombinant novel coronavirus vaccine (Adenovirus type 5 vector)|Other: Placebo				Occurrence of adverse reactions|Anti SARS-CoV-2 S antibody response(ELISA)|Neutralizing antibody response to SARS-CoV-2|Occurrence of adverse events|Occurrence of serious adverse reaction|Neutralizing antibody response to Ad5-vector				Allocation: Randomized|Intervention Model: Crossover Assignment|Masking: Double (Participant, Investigator)|Primary Purpose: Prevention	COVID-19		April 10, 2020									JSVCT089
NCT04341441	1175	424	https://ClinicalTrials.gov/show/NCT04341441	Inclusion	1		Chloroquine	Antimalaria	North America	United States	3000	Adults	All	3	Triple blind	0	0		1	Prevention	Recruiting		Xsearch NCT	Will Hydroxychloroquine Impede or Prevent COVID-19	Will Hydroxychloroquine Impede or Preven	Prevention	Drug: Hydroxychloroquine - Daily Dosing|Drug: Hydroxychloroquine - Weekly Dosing|Other: Placebo oral tablet|Diagnostic Test: Monitoring Visit - Baseline|Diagnostic Test: Monitoring Visit - Week 4|Diagnostic Test: Monitoring Visit - Week 8|Other: Weekly Assessment				Reduction in the number of COVID-19 infections in healthcare workers.				Allocation: Randomized|Intervention Model: Parallel Assignment|Masking: Triple (Participant, Care Provider, Investigator)|Primary Purpose: Prevention	COVID-19|Coronavirus|Coronavirus Infections|SARS-CoV 2		April 10, 2020									1410401
NCT04341584	1180	425	https://ClinicalTrials.gov/show/NCT04341584	Inclusion	1		Anakinra	Other immunotherapeutics	Europe	France	240	Adults	All	2	Open label	1	0	1	0	Hospitalised/Severe/ICU	Not Recruiting		Xsearch NCT	CORIMUNO-ANA: Trial Evaluating Efficacy Of Anakinra In Patients With Covid-19 Infection	CORIMUNO-ANA: Trial Evaluating Efficacy	Hospitalised	Drug: Anakinra				Survival without needs of ventilator utilization at day 14|WHO progression scale ‚â§ 5|Cumulative incidence of successful tracheal extubation (defined as duration extubation > 48h) or withdrawal of NIV or high flow (for > 48h), at day 14|Decrease of at least one point in WHO progression scale score|WHO progression scale|Survival|28-day ventilator free-days|Respiratory acidosis|PaO2/FiO2 ratio|Tim…				Allocation: Randomized|Intervention Model: Parallel Assignment|Masking: None (Open Label)|Primary Purpose: Treatment	Corona Virus Infection		April 10, 2020									APHP200375-5
NCT04341675	1182	426	https://ClinicalTrials.gov/show/NCT04341675	Inclusion	1		Sirolimus	Antibiotics/antifungal	North America	United States	30	Adults	All	2	Quadruple blind	0	0		0	Hospitalised/Severe/ICU	Recruiting		Xsearch NCT	Sirolimus Treatment in Hospitalized Patients With COVID-19 Pneumonia	Sirolimus Treatment in Hospitalized Pati	Hospitalised	Drug: Sirolimus|Drug: Placebo				Progression to advanced respiratory support				Allocation: Randomized|Intervention Model: Parallel Assignment|Masking: Quadruple (Participant, Care Provider, Investigator, Outcomes Assessor)|Primary Purpose: Treatment	COVID-19		April 10, 2020									2020-0337
NCT04341727	1185	427	https://ClinicalTrials.gov/show/NCT04341727	Inclusion	1		Chloroquine / Azithromycin	Antimalaria_antiviral/antibiotic	North America	United States	500	Adults	All	3	Open label	0	0		0	Hospitalised/Severe/ICU	Not Recruiting		Xsearch NCT	Hydroxychloroquine,Hydroxychloroquine,Azithromycin in the Treatment of SARS CoV-2 Infection	Hydroxychloroquine,Hydroxychloroquine,Az	Hospitalised	Drug: Hydroxychloroquine Sulfate|Drug: Azithromycin|Drug: Chloroquine Sulfate				Hours to recovery|Time fever resolution				Allocation: Randomized|Intervention Model: Parallel Assignment|Masking: None (Open Label)|Primary Purpose: Treatment	Coronavirus Infection		April 10, 2020									202003188
NCT04341870	1188	428	https://ClinicalTrials.gov/show/NCT04341870	Inclusion	1		Chloroquine + other	Other drug combinations	Europe	France	60	Adults	All	3	Open label	1	0	1	1	Hospitalised/Severe/ICU	Not Recruiting		Xsearch NCT	Study of Immune Modulatory Drugs and Other Treatments in COVID-19 Patients: Sarilumab, Azithromycin, Hydroxychloroquine Trial - CORIMUNO-19 - VIRO	Study of Immune Modulatory Drugs and Oth	Hospitalised	Drug: Sarilumab|Drug: Azithromycin|Drug: Hydroxychloroquine				Need for ventilation (including invasive and non invasive ventilation), intensive care or death|Early improvement: OMS progression scale <= 5|OMS progression scale|Survival|ICU-free days alive|Ventilation-free days alive|Hospital-free days alive|Oxygen therapy-free days alive|Time to negative viral excretion|Immunophenotyping and multiplex cytokines				Allocation: Randomized|Intervention Model: Parallel Assignment|Masking: None (Open Label)|Primary Purpose: Treatment	COVID19|SARS-CoV-2 Infection		April 10, 2020									APHP200375-3
NCT04341935	1190	429	https://ClinicalTrials.gov/show/NCT04341935	Inclusion	1		Linagliptin/insulin	Other	North America	United States	20	Adults	All	4	Open label	0	0		0	Mild/moderate	Not Recruiting		Xsearch NCT	Effects of DPP4 Inhibition on COVID-19	Effects of DPP4 Inhibition on COVID-19	Mild/moderate	Drug: Linagliptin|Drug: Insulin regimen				Changes in Glucose Llevels|Changes in SpO2 levels|Changes in Interleukin 6 (IL6)|Changes in chest structures				Allocation: Randomized|Intervention Model: Parallel Assignment|Masking: None (Open Label)|Primary Purpose: Treatment	Coronavirus Infection|Type 2 Diabetes		April 10, 2020									20200384
NCT04342156	1192	430	https://ClinicalTrials.gov/show/NCT04342156	Inclusion	1		Chloroquine	Antimalaria	Asia	Singapore	3000	Adults	All	3	Open label	0	0		0	Prevention	Not Recruiting		Xsearch NCT	Safety And Efficacy Of Hydroxychloroquine As COVID-19 Prophylaxis For At-Risk Population (SHARP): A Cluster Randomized Controlled Trial	Safety And Efficacy Of Hydroxychloroquin	Prevention	Drug: Hydroxychloroquine Sulfate 200 milligram (mg) Tab				positive serology or reverse transcriptase (RT-PCR) for COVID-19 up until day 28.				Allocation: Randomized|Intervention Model: Parallel Assignment|Masking: None (Open Label)|Primary Purpose: Prevention	Coronavirus Infection|Hydroxychloroquine Adverse Reaction		April 10, 2020									2020/00402
NCT04342169	1193	431	https://ClinicalTrials.gov/show/NCT04342169	Inclusion	1		Chloroquine	Antimalaria	North America	United States	400	Adults	All	2	Open label	0	0		0	Diagnosed/suspected COVID	Recruiting		Xsearch NCT	University of Utah COVID-19 Hydrochloroquine Trial	University of Utah COVID-19 Hydrochloroq	Confirmed	Drug: Hydroxychloroquine|Drug: Placebo oral tablet				Duration of viral shedding|Duration of COVID-19-attributable symptoms|Hospitalization|Adult household contact viral acquisition				Allocation: Randomized|Intervention Model: Parallel Assignment|Masking: None (Open Label)|Primary Purpose: Treatment	Coronavirus Infection|Coronavirus|Infectious Disease		April 10, 2020									IRB_00131893
NCT04342221	1197	432	https://ClinicalTrials.gov/show/NCT04342221	Inclusion	1		Chloroquine	Antimalaria	Europe	Germany	220	Adults	All	3	Quadruple blind	0	1	1	1	Hospitalised/Severe/ICU	Recruiting		Xsearch NCT	Hydroxychloroquine for COVID-19	Hydroxychloroquine for COVID-19	Hospitalised	Drug: Hydroxychloroquine Sulfate|Drug: Placebo				Effect of HCQ on in vivo viral clearance				Allocation: Randomized|Intervention Model: Parallel Assignment|Masking: Quadruple (Participant, Care Provider, Investigator, Outcomes Assessor)|Primary Purpose: Treatment	COVID-19, Hydroxychloroquine Sulfate		April 10, 2020									COV-HCQ|2020-001224-33
NCT04342650	1199	433	https://ClinicalTrials.gov/show/NCT04342650	Inclusion	1		Chloroquine	Antimalaria	South America	Brazil	210	Adults	All	2	Quadruple blind	0	1	1	0	Prevention	Recruiting		Xsearch NCT	Chloroquine Diphosphate in the Prevention of SARS in Covid-19 Infection	Chloroquine Diphosphate in the Preventio	Prevention	Drug: Chloroquine Diphosphate|Drug: Placebo oral tablet				Proportion of patients with onset of severe acute respiratory syndrome (SARS)|Mortality rate|Number of participants in need of intensive care support|Viral concentration|Cumulative incidence of serious adverse events|Cumulative incidence of grade 3 and 4 adverse events|Proportion of patients with discontinued treatment|Incidence of cardiac lesions|Incidence of cardiac disfunctions|Change in respi…				Allocation: Randomized|Intervention Model: Parallel Assignment|Masking: Quadruple (Participant, Care Provider, Investigator, Outcomes Assessor)|Primary Purpose: Treatment	COVID-19|SARS-CoV Infection|Severe Acute Respiratory Syndrome (SARS) Pneumonia|Clinical Trial		April 13, 2020									CAAE: 30504220.5.0000.0005
NCT04342663	1200	434	https://ClinicalTrials.gov/show/NCT04342663	Inclusion	1		Fluvoxamine	Other	North America	United States	152	Adults	All	2	Triple blind	0	0		0	Mild/moderate	Recruiting		Xsearch NCT	A Double-blind, Placebo-controlled Clinical Trial of Fluvoxamine for Symptomatic Individuals With COVID-19 Infection	A Double-blind, Placebo-controlled Clini	Mild	Drug: Fluvoxamine|Drug: Placebo				Time to clinical worsening|clinical deterioration on a Likert-type scale (1-6)|clinical deterioration measured by number of days|Symptomatic severity on a likert scale (0-10 where 0= none and 10=very severe)				Allocation: Randomized|Intervention Model: Parallel Assignment|Masking: Triple (Participant, Investigator, Outcomes Assessor)|Primary Purpose: Treatment	COVID 19|Coronavirus		April 13, 2020									202004023
NCT04342689	1201	435	https://ClinicalTrials.gov/show/NCT04342689	Inclusion	1		Bobs Red Mill	Dietary supplements	North America	United States	1300	Adults	All	N/A	Quadruple blind	0	0		1	Diagnosed/suspected COVID	Not Recruiting		Xsearch NCT	The Role of Resistant Potato Starch in COVID-19 Infection	The Role of Resistant Potato Starch in C	Confirmed	Dietary Supplement: Bob's Red Mill|Dietary Supplement: Control - Amioca powder (Amylopectin)				Rates of hospitalization for a COVID-19 related complication|Time to clinical recovery (TTCR)|Symptom Severity Score				Allocation: Randomized|Intervention Model: Parallel Assignment|Masking: Quadruple (Participant, Care Provider, Investigator, Outcomes Assessor)|Primary Purpose: Prevention	COVID-19		April 13, 2020									2000027887
[truncated: 3,605 more rows]
[truncated: 16 more columns]
